# Supplementary material for: Taming of 4-azido-3,5-dinitropyrazole based energetic materials
Source: Royal Society of Chemistry journal article supplement (doi:10.1039/d3ma00742a), 2023-11-01
Supplement: d3ma00742a1.pdf [file d3ma00742a1.pdf]

**Electronic Supplementary Information**

**Taming of 4-Azido-3,5-dinitropyrazole Based Energetic  
Materials**

Priyanka Das, <sup>[a]</sup> Prachi Bhatia, <sup>[a]</sup> Krishna Pandey, <sup>[a]</sup> and Dheeraj Kumar\*<sup>[a]</sup>

<sup>[a]</sup> Energetic Materials Laboratory, Department of Chemistry, Indian Institute of Technology Roorkee, Roorkee-247667, Uttarakhand, India. E-mail: dheeraj.kumar@cy.iitr.ac.in

**Table of content:**

|    |                        |    |
|----|------------------------|----|
| 1. | Crystal structure data | 2  |
| 2. | Isodesmic Reaction     | 13 |
| 3. | NMR spectra            | 13 |
| 4. | IR spectra             | 31 |
| 5. | Mass Spectra           | 39 |
| 6. | Thermal analysis       | 40 |

## 1. Crystal structure data

**Table 1: Crystal data and structure refinement for Compound 4.**

|                                             |                                                               |
|---------------------------------------------|---------------------------------------------------------------|
| Identification code                         | cu_PKP_28092022_TVK_DNAP_AM_OXD_cu2_0m_a (2)                  |
| Empirical formula                           | C <sub>6</sub> H <sub>4</sub> N <sub>10</sub> O <sub>5</sub>  |
| Formula weight                              | 296.19                                                        |
| Temperature/K                               | 295(2)                                                        |
| Crystal system                              | orthorhombic                                                  |
| Space group                                 | Pca2 <sub>1</sub>                                             |
| a/Å                                         | 14.708(3)                                                     |
| b/Å                                         | 5.921(2)                                                      |
| c/Å                                         | 25.458(5)                                                     |
| α/°                                         | 90.00(3)                                                      |
| β/°                                         | 90.00(3)                                                      |
| γ/°                                         | 90.00(3)                                                      |
| Volume/Å <sup>3</sup>                       | 2216.9(10)                                                    |
| Z                                           | 8                                                             |
| ρ <sub>calc</sub> /cm <sup>3</sup>          | 1.775                                                         |
| μ/mm <sup>-1</sup>                          | 1.368                                                         |
| F(000)                                      | 1200.0                                                        |
| Crystal size/mm <sup>3</sup>                | 0.263 × 0.108 × 0.102                                         |
| Radiation                                   | CuKα (λ = 1.54184)                                            |
| 2θ range for data collection/°              | 6.944 to 120.058                                              |
| Index ranges                                | -16 ≤ h ≤ 16, -6 ≤ k ≤ 6, -28 ≤ l ≤ 28                        |
| Reflections collected                       | 26328                                                         |
| Independent reflections                     | 3239 [R <sub>int</sub> = 0.0359, R <sub>sigma</sub> = 0.0218] |
| Data/restraints/parameters                  | 3239/1/395                                                    |
| Goodness-of-fit on F <sup>2</sup>           | 1.133                                                         |
| Final R indexes [I ≥ 2σ (I)]                | R <sub>1</sub> = 0.0423, wR <sub>2</sub> = 0.1161             |
| Final R indexes [all data]                  | R <sub>1</sub> = 0.0427, wR <sub>2</sub> = 0.1167             |
| Largest diff. peak/hole / e Å <sup>-3</sup> | 0.32/-0.23                                                    |
| Flack parameter                             | 0.23(6)                                                       |
| CCDC number                                 | 2287540                                                       |

**Table 2: Fractional Atomic Coordinates (×10<sup>4</sup>) and Equivalent Isotropic Displacement Parameters (Å<sup>2</sup>×10<sup>3</sup>) for 4. U<sub>eq</sub> is defined as 1/3 of the trace of the orthogonalised U<sub>ij</sub> tensor.**

| Atom           | x       | y        | z          | U(eq)    |
|----------------|---------|----------|------------|----------|
| O <sub>1</sub> | 7128(3) | 16070(7) | 6612.6(18) | 79.1(13) |
| O <sub>2</sub> | 6339(3) | 14717(7) | 5984(2)    | 79.5(13) |

|                 |            |          |            |          |
|-----------------|------------|----------|------------|----------|
| O <sub>3</sub>  | 8311(3)    | 6908(5)  | 5429.0(14) | 58.8(9)  |
| O <sub>4</sub>  | 9678(3)    | 7878(7)  | 5660.0(19) | 79.8(13) |
| O <sub>5</sub>  | 9370.2(17) | 6276(5)  | 7263.8(12) | 40.2(7)  |
| N <sub>1</sub>  | 6996(2)    | 14721(6) | 6260.0(16) | 45.2(8)  |
| N <sub>2</sub>  | 8838(3)    | 8199(6)  | 5639.5(15) | 43.7(9)  |
| N <sub>3</sub>  | 6840(2)    | 10595(7) | 5546.5(14) | 50.2(10) |
| N <sub>4</sub>  | 6879(2)    | 9218(6)  | 5177.5(14) | 43.0(8)  |
| N <sub>5</sub>  | 6766(3)    | 8095(7)  | 4825.8(19) | 61.9(11) |
| N <sub>6</sub>  | 8970(2)    | 11453(6) | 6220.7(13) | 35.3(7)  |
| N <sub>7</sub>  | 8485(2)    | 13190(6) | 6403.8(13) | 37.9(8)  |
| N <sub>8</sub>  | 10616(2)   | 8228(6)  | 7057.4(15) | 41.4(8)  |
| N <sub>9</sub>  | 9103(2)    | 8021(6)  | 6908.2(13) | 39.1(8)  |
| N <sub>10</sub> | 10685(3)   | 5039(7)  | 7631.2(16) | 46.3(10) |
| C <sub>1</sub>  | 7683(3)    | 13006(6) | 6165.2(16) | 35.7(9)  |
| C <sub>2</sub>  | 7619(3)    | 11143(6) | 5823.7(15) | 35.3(8)  |
| C <sub>3</sub>  | 8482(2)    | 10177(7) | 5879.9(14) | 33.6(8)  |
| C <sub>4</sub>  | 9889(3)    | 11084(8) | 6450.5(15) | 37.4(9)  |
| C <sub>5</sub>  | 9859(2)    | 9054(7)  | 6811.1(14) | 30.5(8)  |
| C <sub>6</sub>  | 10276(3)   | 6512(7)  | 7327.6(15) | 34.1(8)  |

**Table 3: Anisotropic Displacement Parameters ( $\text{\AA}^2 \times 10^3$ ) for 4. The Anisotropic displacement factor exponent takes the form:  $-2\pi^2[h^2a^{*2}U_{11}+2hka^*b^*U_{12}+\dots]$ .**

| Atom            | U <sub>11</sub> | U <sub>22</sub> | U <sub>33</sub> | U <sub>23</sub> | U <sub>13</sub> | U <sub>12</sub> |
|-----------------|-----------------|-----------------|-----------------|-----------------|-----------------|-----------------|
| O <sub>1</sub>  | 59(2)           | 73(2)           | 106(3)          | -50(2)          | -3(2)           | 14.2(18)        |
| O <sub>2</sub>  | 59(2)           | 76(3)           | 103(3)          | -25(2)          | -33(2)          | 29.8(19)        |
| O <sub>3</sub>  | 53(2)           | 53.8(19)        | 70(2)           | -22.6(17)       | -9.7(18)        | 4.3(15)         |
| O <sub>4</sub>  | 51(2)           | 87(3)           | 101(3)          | -41(3)          | -5(2)           | 21.7(19)        |
| O <sub>5</sub>  | 27.6(14)        | 46.4(15)        | 46.5(14)        | 7.7(13)         | -4.4(11)        | -3.8(11)        |
| N <sub>1</sub>  | 39.5(19)        | 38.6(19)        | 58(2)           | -1.4(16)        | -3.7(17)        | 3.5(16)         |
| N <sub>2</sub>  | 39(2)           | 48(2)           | 44.3(18)        | -5.6(16)        | -3.2(16)        | 9.2(15)         |
| N <sub>3</sub>  | 35(2)           | 64(2)           | 52(2)           | -22(2)          | -9.3(15)        | 5.3(18)         |
| N <sub>4</sub>  | 35.4(19)        | 49(2)           | 44(2)           | 0.3(19)         | -5.1(15)        | -3.1(15)        |
| N <sub>5</sub>  | 59(3)           | 64(3)           | 62(3)           | -15(2)          | -10(2)          | -0.5(19)        |
| N <sub>6</sub>  | 28.6(18)        | 38.9(18)        | 38.4(17)        | -0.8(13)        | -5.3(14)        | -2.0(13)        |
| N <sub>7</sub>  | 36.1(19)        | 33.0(17)        | 44.4(19)        | 0.3(13)         | -3.1(14)        | -0.1(14)        |
| N <sub>8</sub>  | 28.9(17)        | 51(2)           | 44.0(18)        | 6.7(15)         | -7.5(15)        | -3.5(14)        |
| N <sub>9</sub>  | 26.5(17)        | 41.9(19)        | 49(2)           | 5.7(15)         | -7.6(13)        | 2.5(13)         |
| N <sub>10</sub> | 26(2)           | 60(3)           | 53(2)           | 16.2(18)        | -9.1(17)        | -7.6(17)        |
| C <sub>1</sub>  | 33(2)           | 35.2(19)        | 39(2)           | -0.8(17)        | 2.4(17)         | 2.9(15)         |
| C <sub>2</sub>  | 37(2)           | 34(2)           | 34.6(19)        | 2.7(15)         | -3.4(16)        | -0.8(16)        |
| C <sub>3</sub>  | 30.2(18)        | 38(2)           | 32.8(17)        | -1.1(15)        | -1.1(15)        | 1.8(15)         |
| C <sub>4</sub>  | 30(2)           | 42(2)           | 41(2)           | 1.9(17)         | -8.0(16)        | -0.9(15)        |
| C <sub>5</sub>  | 23.1(18)        | 35(2)           | 33.3(17)        | -3.8(16)        | -4.2(14)        | 0.6(14)         |

| Atom              | U <sub>11</sub> | U <sub>22</sub> | U <sub>33</sub> | U <sub>23</sub> | U <sub>13</sub> | U <sub>12</sub> |
|-------------------|-----------------|-----------------|-----------------|-----------------|-----------------|-----------------|
| C <sub>6</sub>    | 31(2)           | 38.8(19)        | 33.0(19)        | -1.9(16)        | -1.1(15)        | -6.9(15)        |
| O <sub>1_1</sub>  | 65(2)           | 69(3)           | 98(3)           | -42(2)          | -4(2)           | 15.6(18)        |
| O <sub>2_1</sub>  | 50(2)           | 51.5(19)        | 77(2)           | 2.8(16)         | -11.0(18)       | 13.6(15)        |
| O <sub>3_1</sub>  | 53(2)           | 44.3(17)        | 61.1(19)        | -16.0(14)       | -7.3(16)        | -1.7(13)        |
| O <sub>4_1</sub>  | 45(2)           | 86(3)           | 94(3)           | -46(3)          | -13(2)          | 22.0(18)        |
| O <sub>5_1</sub>  | 29.9(14)        | 52.5(17)        | 42.6(15)        | 4.7(13)         | 6.5(12)         | 11.5(12)        |
| N <sub>1_1</sub>  | 35.2(19)        | 38.7(18)        | 59(2)           | -1.5(16)        | 4.9(17)         | 1.2(14)         |
| N <sub>2_1</sub>  | 35.3(19)        | 45.6(19)        | 37.9(17)        | -5.4(15)        | -4.3(15)        | 3.0(13)         |
| N <sub>3_1</sub>  | 36(2)           | 58(2)           | 52(2)           | -8.9(19)        | -6.0(15)        | 5.1(16)         |
| N <sub>4_1</sub>  | 39.1(19)        | 46(2)           | 44(2)           | 3(2)            | 0.0(15)         | -4.7(15)        |
| N <sub>5_1</sub>  | 55(2)           | 62(3)           | 54(2)           | -10(2)          | -11.6(19)       | -7.0(18)        |
| N <sub>6_1</sub>  | 33.3(17)        | 33.5(16)        | 34.9(16)        | -0.3(12)        | 2.5(13)         | 0.1(13)         |
| N <sub>7_1</sub>  | 38(2)           | 33.5(18)        | 38.3(17)        | 0.5(13)         | 0.6(15)         | -2.0(12)        |
| N <sub>8_1</sub>  | 26.4(17)        | 45.7(18)        | 43.5(18)        | 4.4(14)         | -1.4(14)        | -0.1(13)        |
| N <sub>9_1</sub>  | 30.5(18)        | 49.0(19)        | 39.0(17)        | 2.5(14)         | 0.8(14)         | 2.6(14)         |
| N <sub>10_1</sub> | 28.5(18)        | 57(2)           | 52(2)           | 16.8(17)        | 1.8(15)         | 3.6(15)         |
| C <sub>1_1</sub>  | 38(2)           | 32(2)           | 40(2)           | 5.0(16)         | 1.8(18)         | -0.7(15)        |
| C <sub>2_1</sub>  | 27.3(19)        | 38.0(19)        | 33(2)           | 1.8(15)         | 1.6(15)         | -2.0(15)        |
| C <sub>3_1</sub>  | 31.0(19)        | 31.7(18)        | 31.8(17)        | 3.1(15)         | -1.1(15)        | -1.8(15)        |
| C <sub>4_1</sub>  | 27.0(19)        | 45(2)           | 45(2)           | -0.5(18)        | -3.6(16)        | -3.5(15)        |
| C <sub>5_1</sub>  | 24.3(17)        | 37(2)           | 32.8(17)        | -10.6(16)       | -0.3(14)        | -1.4(14)        |
| C <sub>6_1</sub>  | 22.5(19)        | 50(2)           | 39(2)           | -2.3(17)        | -0.4(16)        | -2.0(15)        |

**Table 4: Bond Lengths for 4.**

| Atom           | Atom           | Length/Å | Atom              | Atom             | Length/Å |
|----------------|----------------|----------|-------------------|------------------|----------|
| O <sub>1</sub> | N <sub>1</sub> | 1.217(5) | O <sub>1_1</sub>  | N <sub>1_1</sub> | 1.211(5) |
| O <sub>2</sub> | N <sub>1</sub> | 1.196(5) | O <sub>2_1</sub>  | N <sub>1_1</sub> | 1.211(5) |
| O <sub>3</sub> | N <sub>2</sub> | 1.214(5) | O <sub>3_1</sub>  | N <sub>2_1</sub> | 1.239(5) |
| O <sub>4</sub> | N <sub>2</sub> | 1.251(5) | O <sub>4_1</sub>  | N <sub>2_1</sub> | 1.200(5) |
| O <sub>5</sub> | N <sub>9</sub> | 1.429(4) | O <sub>5_1</sub>  | N <sub>9_1</sub> | 1.434(4) |
| O <sub>5</sub> | C <sub>6</sub> | 1.349(5) | O <sub>5_1</sub>  | C <sub>6_1</sub> | 1.340(5) |
| N <sub>3</sub> | N <sub>4</sub> | 1.245(5) | N <sub>3_1</sub>  | N <sub>4_1</sub> | 1.253(6) |
| N <sub>4</sub> | N <sub>5</sub> | 1.127(6) | N <sub>4_1</sub>  | N <sub>5_1</sub> | 1.109(5) |
| N <sub>6</sub> | N <sub>7</sub> | 1.336(5) | N <sub>6_1</sub>  | N <sub>7_1</sub> | 1.333(5) |
| N <sub>6</sub> | C <sub>3</sub> | 1.357(5) | N <sub>6_1</sub>  | C <sub>3_1</sub> | 1.380(5) |
| N <sub>8</sub> | C <sub>5</sub> | 1.368(5) | N <sub>6_1</sub>  | C <sub>4_1</sub> | 1.463(5) |
| C <sub>1</sub> | N <sub>1</sub> | 1.452(5) | N <sub>7_1</sub>  | C <sub>1_1</sub> | 1.333(6) |
| C <sub>1</sub> | N <sub>7</sub> | 1.332(5) | N <sub>8_1</sub>  | C <sub>5_1</sub> | 1.357(5) |
| C <sub>1</sub> | C <sub>2</sub> | 1.408(6) | N <sub>8_1</sub>  | C <sub>6_1</sub> | 1.316(6) |
| C <sub>2</sub> | N <sub>3</sub> | 1.383(5) | N <sub>9_1</sub>  | C <sub>5_1</sub> | 1.299(5) |
| C <sub>2</sub> | C <sub>3</sub> | 1.399(6) | N <sub>10_1</sub> | C <sub>6_1</sub> | 1.324(6) |

| Atom           | Atom            | Length/Å | Atom             | Atom             | Length/Å |
|----------------|-----------------|----------|------------------|------------------|----------|
| C <sub>3</sub> | N <sub>2</sub>  | 1.422(5) | C <sub>1_1</sub> | N <sub>1_1</sub> | 1.449(6) |
| C <sub>4</sub> | N <sub>6</sub>  | 1.489(5) | C <sub>2_1</sub> | N <sub>3_1</sub> | 1.390(6) |
| C <sub>5</sub> | N <sub>9</sub>  | 1.294(5) | C <sub>2_1</sub> | C <sub>1_1</sub> | 1.393(6) |
| C <sub>5</sub> | C <sub>4</sub>  | 1.513(5) | C <sub>3_1</sub> | N <sub>2_1</sub> | 1.420(5) |
| C <sub>6</sub> | N <sub>8</sub>  | 1.325(5) | C <sub>3_1</sub> | C <sub>2_1</sub> | 1.397(5) |
| C <sub>6</sub> | N <sub>10</sub> | 1.312(6) | C <sub>4_1</sub> | C <sub>5_1</sub> | 1.487(6) |

**Table 5: Bond Angles for 4.**

| Atom            | Atom           | Atom           | Angle/°  | Atom              | Atom             | Atom              | Angle/°  |
|-----------------|----------------|----------------|----------|-------------------|------------------|-------------------|----------|
| C <sub>6</sub>  | O <sub>5</sub> | N <sub>9</sub> | 105.9(3) | C <sub>6_1</sub>  | O <sub>5_1</sub> | N <sub>9_1</sub>  | 106.1(3) |
| O <sub>1</sub>  | N <sub>1</sub> | C <sub>1</sub> | 118.1(4) | O <sub>1_1</sub>  | N <sub>1_1</sub> | O <sub>2_1</sub>  | 124.4(4) |
| O <sub>2</sub>  | N <sub>1</sub> | O <sub>1</sub> | 124.3(4) | O <sub>1_1</sub>  | N <sub>1_1</sub> | C <sub>1_1</sub>  | 118.2(4) |
| O <sub>2</sub>  | N <sub>1</sub> | C <sub>1</sub> | 117.6(4) | O <sub>2_1</sub>  | N <sub>1_1</sub> | C <sub>1_1</sub>  | 117.4(4) |
| O <sub>3</sub>  | N <sub>2</sub> | O <sub>4</sub> | 123.6(4) | O <sub>3_1</sub>  | N <sub>2_1</sub> | C <sub>3_1</sub>  | 117.4(3) |
| O <sub>3</sub>  | N <sub>2</sub> | C <sub>3</sub> | 118.2(4) | O <sub>4_1</sub>  | N <sub>2_1</sub> | O <sub>3_1</sub>  | 122.8(3) |
| O <sub>4</sub>  | N <sub>2</sub> | C <sub>3</sub> | 118.2(4) | O <sub>4_1</sub>  | N <sub>2_1</sub> | C <sub>3_1</sub>  | 119.7(3) |
| N <sub>4</sub>  | N <sub>3</sub> | C <sub>2</sub> | 120.0(4) | N <sub>4_1</sub>  | N <sub>3_1</sub> | C <sub>2_1</sub>  | 121.2(3) |
| N <sub>5</sub>  | N <sub>4</sub> | N <sub>3</sub> | 168.1(4) | N <sub>5_1</sub>  | N <sub>4_1</sub> | N <sub>3_1</sub>  | 168.3(4) |
| N <sub>7</sub>  | N <sub>6</sub> | C <sub>3</sub> | 111.6(3) | N <sub>7_1</sub>  | N <sub>6_1</sub> | C <sub>3_1</sub>  | 110.1(3) |
| N <sub>7</sub>  | N <sub>6</sub> | C <sub>4</sub> | 117.5(3) | N <sub>7_1</sub>  | N <sub>6_1</sub> | C <sub>4_1</sub>  | 119.2(3) |
| C <sub>3</sub>  | N <sub>6</sub> | C <sub>4</sub> | 130.6(3) | C <sub>3_1</sub>  | N <sub>6_1</sub> | C <sub>4_1</sub>  | 130.7(3) |
| C <sub>1</sub>  | N <sub>7</sub> | N <sub>6</sub> | 104.6(3) | N <sub>6_1</sub>  | N <sub>7_1</sub> | C <sub>1_1</sub>  | 105.6(3) |
| C <sub>6</sub>  | N <sub>8</sub> | C <sub>5</sub> | 101.8(3) | C <sub>6_1</sub>  | N <sub>8_1</sub> | C <sub>5_1</sub>  | 103.2(3) |
| C <sub>5</sub>  | N <sub>9</sub> | O <sub>5</sub> | 103.0(3) | C <sub>5_1</sub>  | N <sub>9_1</sub> | O <sub>5_1</sub>  | 102.8(3) |
| N <sub>7</sub>  | C <sub>1</sub> | N <sub>1</sub> | 118.9(4) | N <sub>7_1</sub>  | C <sub>1_1</sub> | N <sub>1_1</sub>  | 117.8(4) |
| N <sub>7</sub>  | C <sub>1</sub> | C <sub>2</sub> | 113.9(3) | N <sub>7_1</sub>  | C <sub>1_1</sub> | C <sub>2_1</sub>  | 113.9(3) |
| C <sub>2</sub>  | C <sub>1</sub> | N <sub>1</sub> | 127.2(4) | C <sub>2_1</sub>  | C <sub>1_1</sub> | N <sub>1_1</sub>  | 128.1(4) |
| N <sub>3</sub>  | C <sub>2</sub> | C <sub>1</sub> | 123.6(4) | N <sub>3_1</sub>  | C <sub>2_1</sub> | C <sub>1_1</sub>  | 123.2(4) |
| N <sub>3</sub>  | C <sub>2</sub> | C <sub>3</sub> | 135.0(4) | N <sub>3_1</sub>  | C <sub>2_1</sub> | C <sub>3_1</sub>  | 134.9(4) |
| C <sub>3</sub>  | C <sub>2</sub> | C <sub>1</sub> | 101.3(3) | C <sub>1_1</sub>  | C <sub>2_1</sub> | C <sub>3_1</sub>  | 101.8(3) |
| N <sub>6</sub>  | C <sub>3</sub> | N <sub>2</sub> | 122.6(3) | N <sub>6_1</sub>  | C <sub>3_1</sub> | N <sub>2_1</sub>  | 121.6(3) |
| N <sub>6</sub>  | C <sub>3</sub> | C <sub>2</sub> | 108.6(3) | N <sub>6_1</sub>  | C <sub>3_1</sub> | C <sub>2_1</sub>  | 108.6(3) |
| C <sub>2</sub>  | C <sub>3</sub> | N <sub>2</sub> | 128.8(4) | C <sub>2_1</sub>  | C <sub>3_1</sub> | N <sub>2_1</sub>  | 129.7(3) |
| N <sub>6</sub>  | C <sub>4</sub> | C <sub>5</sub> | 109.2(3) | N <sub>6_1</sub>  | C <sub>4_1</sub> | C <sub>5_1</sub>  | 111.2(3) |
| N <sub>8</sub>  | C <sub>5</sub> | C <sub>4</sub> | 122.6(3) | N <sub>8_1</sub>  | C <sub>5_1</sub> | C <sub>4_1</sub>  | 123.5(3) |
| N <sub>9</sub>  | C <sub>5</sub> | N <sub>8</sub> | 116.3(4) | N <sub>9_1</sub>  | C <sub>5_1</sub> | N <sub>8_1</sub>  | 115.4(4) |
| N <sub>9</sub>  | C <sub>5</sub> | C <sub>4</sub> | 121.1(3) | N <sub>9_1</sub>  | C <sub>5_1</sub> | C <sub>4_1</sub>  | 121.0(3) |
| N <sub>8</sub>  | C <sub>6</sub> | O <sub>5</sub> | 113.0(3) | N <sub>8_1</sub>  | C <sub>6_1</sub> | O <sub>5_1</sub>  | 112.4(3) |
| N <sub>10</sub> | C <sub>6</sub> | O <sub>5</sub> | 117.1(4) | N <sub>8_1</sub>  | C <sub>6_1</sub> | N <sub>10_1</sub> | 129.4(4) |
| N <sub>10</sub> | C <sub>6</sub> | N <sub>8</sub> | 130.0(4) | N <sub>10_1</sub> | C <sub>6_1</sub> | O <sub>5_1</sub>  | 118.2(4) |

**Table 6: Crystal data and structure refinement for Compound 7.**

|                                             |                                                               |
|---------------------------------------------|---------------------------------------------------------------|
| Identification code                         | AZ_AMS_Rt_Cu                                                  |
| Empirical formula                           | C <sub>6</sub> H <sub>6</sub> N <sub>12</sub> O <sub>7</sub>  |
| Formula weight                              | 358.23                                                        |
| Temperature/K                               | 298.00                                                        |
| Crystal system                              | monoclinic                                                    |
| Space group                                 | P2 <sub>1</sub> /n                                            |
| a/Å                                         | 13.3320(8)                                                    |
| b/Å                                         | 7.5876(3)                                                     |
| c/Å                                         | 14.6125(8)                                                    |
| α/°                                         | 90                                                            |
| β/°                                         | 116.909(7)                                                    |
| γ/°                                         | 90                                                            |
| Volume/Å <sup>3</sup>                       | 1318.12(14)                                                   |
| Z                                           | 4                                                             |
| ρ <sub>calc</sub> /cm <sup>3</sup>          | 1.805                                                         |
| μ/mm <sup>-1</sup>                          | 1.441                                                         |
| F(000)                                      | 728.0                                                         |
| Crystal size/mm <sup>3</sup>                | 0.123 × 0.112 × 0.095                                         |
| Radiation                                   | CuKα (λ = 1.54184)                                            |
| 2θ range for data collection/°              | 7.46 to 137.928                                               |
| Index ranges                                | -16 ≤ h ≤ 15, -9 ≤ k ≤ 7, -17 ≤ l ≤ 17                        |
| Reflections collected                       | 7678                                                          |
| Independent reflections                     | 2424 [R <sub>int</sub> = 0.0306, R <sub>sigma</sub> = 0.0241] |
| Data/restraints/parameters                  | 2424/0/242                                                    |
| Goodness-of-fit on F <sup>2</sup>           | 1.065                                                         |
| Final R indexes [I ≥ 2σ (I)]                | R <sub>1</sub> = 0.0351, wR <sub>2</sub> = 0.0861             |
| Final R indexes [all data]                  | R <sub>1</sub> = 0.0448, wR <sub>2</sub> = 0.0935             |
| Largest diff. peak/hole / e Å <sup>-3</sup> | 0.19/-0.18                                                    |
| CCDC number                                 | 2287541                                                       |

**Table 7: Fractional Atomic Coordinates (×10<sup>4</sup>) and Equivalent Isotropic Displacement Parameters (Å<sup>2</sup>×10<sup>3</sup>) for 7. U<sub>eq</sub> is defined as 1/3 of the trace of the orthogonalised U<sub>ij</sub> tensor.**

| Atom           | x           | y          | z          | U(eq)   |
|----------------|-------------|------------|------------|---------|
| O <sub>1</sub> | 8829.0(14)  | -3323(2)   | 6857.5(11) | 59.6(4) |
| O <sub>2</sub> | 10227.0(13) | -3613(2)   | 6505.6(13) | 63.2(5) |
| O <sub>3</sub> | 8791.9(13)  | 67(2)      | 2825.2(12) | 58.1(4) |
| O <sub>4</sub> | 7205.1(12)  | 1202(2)    | 2593.7(11) | 55.1(4) |
| O <sub>5</sub> | 7050.7(10)  | 5133.4(17) | 4621.4(11) | 45.9(4) |
| O <sub>6</sub> | 3738.6(11)  | 5619.8(19) | 3484.5(12) | 52.6(4) |

|                 |             |             |            |         |
|-----------------|-------------|-------------|------------|---------|
| O <sub>7</sub>  | 4030.9(13)  | 8333.9(18)  | 3950.4(12) | 53.3(4) |
| N <sub>1</sub>  | 9307.1(13)  | -3029(2)    | 6331.1(12) | 39.8(4) |
| N <sub>2</sub>  | 8030.5(13)  | 281(2)      | 3064.3(12) | 37.3(4) |
| N <sub>3</sub>  | 10001.6(13) | -2345(2)    | 4662.9(12) | 44.0(4) |
| N <sub>4</sub>  | 10178.7(12) | -2388(2)    | 3900.5(12) | 39.8(4) |
| N <sub>5</sub>  | 10529.8(16) | -2576(3)    | 3342.8(14) | 62.5(6) |
| N <sub>6</sub>  | 7443.3(12)  | -304.1(18)  | 4396.8(11) | 30.7(3) |
| N <sub>7</sub>  | 7803.0(12)  | -1139.1(18) | 5297.9(11) | 32.5(3) |
| N <sub>8</sub>  | 5506.1(11)  | 3517.3(17)  | 3946.9(10) | 28.5(3) |
| N <sub>9</sub>  | 7396.7(13)  | 3374(2)     | 4586.5(14) | 43.4(4) |
| N <sub>10</sub> | 5504.0(13)  | 6718.1(19)  | 4263.1(12) | 38.6(4) |
| N <sub>11</sub> | 4401.6(14)  | 6849(2)     | 3883.1(12) | 38.3(4) |
| C <sub>1</sub>  | 8744.8(14)  | -1934(2)    | 5433.8(13) | 31.4(4) |
| C <sub>2</sub>  | 9028.3(14)  | -1660(2)    | 4631.2(13) | 31.5(4) |
| C <sub>3</sub>  | 8160.2(14)  | -580(2)     | 3978.0(13) | 31.1(4) |
| C <sub>4</sub>  | 6354.8(14)  | 590(2)      | 4005.9(14) | 32.2(4) |
| C <sub>5</sub>  | 6458.6(13)  | 2531(2)     | 4191.8(13) | 29.8(4) |
| C <sub>6</sub>  | 5919.1(14)  | 5101(2)     | 4230.8(13) | 31.3(4) |
| N <sub>12</sub> | 3342.8(15)  | 11843(2)    | 3234.3(16) | 40.4(4) |

**Table 8: Anisotropic Displacement Parameters ( $\text{\AA}^2 \times 10^3$ ) for 7. The Anisotropic displacement factor exponent takes the form:  $-2\pi^2[h^2a^{*2}U_{11}+2hka^*b^*U_{12}+\dots]$ .**

| Atom            | U <sub>11</sub> | U <sub>22</sub> | U <sub>33</sub> | U <sub>23</sub> | U <sub>13</sub> | U <sub>12</sub> |
|-----------------|-----------------|-----------------|-----------------|-----------------|-----------------|-----------------|
| O <sub>1</sub>  | 67.1(10)        | 72.8(11)        | 47.8(8)         | 18.7(8)         | 33.7(8)         | 24.5(9)         |
| O <sub>2</sub>  | 46.4(9)         | 72.5(11)        | 68.0(10)        | 28.0(9)         | 23.5(8)         | 29.8(8)         |
| O <sub>3</sub>  | 61.4(10)        | 62.6(10)        | 66.2(10)        | 18.8(8)         | 42.7(9)         | 17.9(8)         |
| O <sub>4</sub>  | 47.6(9)         | 58.5(10)        | 54.1(8)         | 21.4(7)         | 18.4(7)         | 19.3(7)         |
| O <sub>5</sub>  | 29.5(7)         | 27.1(7)         | 71.9(9)         | -9.3(6)         | 14.9(7)         | -4.1(5)         |
| O <sub>6</sub>  | 33.2(7)         | 38.6(8)         | 73.3(10)        | 1.4(7)          | 13.0(7)         | 5.9(6)          |
| O <sub>7</sub>  | 74.8(10)        | 31.5(8)         | 68.9(9)         | 12.5(7)         | 45.9(9)         | 25.4(7)         |
| N <sub>1</sub>  | 37.3(9)         | 37.1(9)         | 39.5(8)         | 2.5(7)          | 12.4(7)         | 7.9(7)          |
| N <sub>2</sub>  | 38.2(9)         | 31.1(8)         | 41.7(8)         | 1.6(6)          | 17.3(7)         | 1.9(7)          |
| N <sub>3</sub>  | 36.1(9)         | 54.2(11)        | 45.3(9)         | 5.8(8)          | 21.7(8)         | 14.8(8)         |
| N <sub>4</sub>  | 29.5(8)         | 41.9(10)        | 42.8(9)         | -3.6(7)         | 11.9(7)         | 6.1(7)          |
| N <sub>5</sub>  | 55.3(12)        | 85.5(16)        | 50.8(11)        | 4.7(10)         | 27.6(10)        | 22.9(11)        |
| N <sub>6</sub>  | 27.0(7)         | 24.4(7)         | 37.2(7)         | 0.2(6)          | 11.5(6)         | 3.6(6)          |
| N <sub>7</sub>  | 32.9(8)         | 25.4(8)         | 36.5(7)         | 0.3(6)          | 13.3(7)         | 3.6(6)          |
| N <sub>8</sub>  | 25.9(7)         | 22.2(7)         | 35.7(7)         | 0.7(5)          | 12.3(6)         | 1.8(5)          |
| N <sub>9</sub>  | 28.8(8)         | 29.6(9)         | 65.2(11)        | -6.3(7)         | 15.5(8)         | 1.6(6)          |
| N <sub>10</sub> | 39.0(9)         | 24.5(8)         | 51.3(9)         | -2.7(6)         | 19.5(7)         | 2.4(6)          |
| N <sub>11</sub> | 46.8(9)         | 28.4(8)         | 43.4(8)         | 8.3(6)          | 23.7(8)         | 11.0(7)         |
| C <sub>1</sub>  | 28.8(9)         | 24.6(8)         | 35.2(8)         | -0.2(7)         | 9.5(7)          | 3.5(7)          |
| C <sub>2</sub>  | 26.4(9)         | 25.0(9)         | 39.6(9)         | -4.2(7)         | 11.9(7)         | 0.6(7)          |

|                 |         |         |          |         |         |         |
|-----------------|---------|---------|----------|---------|---------|---------|
| C <sub>3</sub>  | 29.7(9) | 25.3(8) | 35.8(8)  | -2.2(7) | 12.8(7) | 0.7(7)  |
| C <sub>4</sub>  | 24.0(8) | 25.4(9) | 43.8(9)  | 0.8(7)  | 12.3(7) | 4.6(7)  |
| C <sub>5</sub>  | 24.9(8) | 26.4(9) | 35.3(8)  | 0.0(7)  | 11.2(7) | 1.6(7)  |
| C <sub>6</sub>  | 28.9(9) | 25.5(9) | 36.6(9)  | -1.7(7) | 12.4(8) | -0.1(7) |
| N <sub>12</sub> | 31.1(9) | 33.3(9) | 54.4(11) | 1.0(8)  | 17.2(9) | -1.0(7) |

**Table 9: Bond Lengths for 7.**

| Atom           | Atom            | Length/Å   | Atom            | Atom            | Length/Å |
|----------------|-----------------|------------|-----------------|-----------------|----------|
| O <sub>1</sub> | N <sub>1</sub>  | 1.221(2)   | N <sub>6</sub>  | N <sub>7</sub>  | 1.339(2) |
| O <sub>3</sub> | N <sub>2</sub>  | 1.225(2)   | N <sub>6</sub>  | C <sub>3</sub>  | 1.364(2) |
| O <sub>4</sub> | N <sub>2</sub>  | 1.220(2)   | N <sub>6</sub>  | C <sub>4</sub>  | 1.463(2) |
| O <sub>5</sub> | N <sub>9</sub>  | 1.4206(19) | N <sub>7</sub>  | C <sub>1</sub>  | 1.324(2) |
| O <sub>5</sub> | C <sub>6</sub>  | 1.350(2)   | N <sub>8</sub>  | C <sub>5</sub>  | 1.375(2) |
| O <sub>6</sub> | N <sub>11</sub> | 1.235(2)   | N <sub>8</sub>  | C <sub>6</sub>  | 1.308(2) |
| O <sub>7</sub> | N <sub>11</sub> | 1.2517(19) | N <sub>9</sub>  | C <sub>5</sub>  | 1.286(2) |
| N <sub>1</sub> | O <sub>2</sub>  | 1.218(2)   | N <sub>10</sub> | C <sub>6</sub>  | 1.356(2) |
| N <sub>1</sub> | C <sub>1</sub>  | 1.443(2)   | N <sub>11</sub> | N <sub>10</sub> | 1.319(2) |
| N <sub>2</sub> | C <sub>3</sub>  | 1.425(2)   | C <sub>2</sub>  | C <sub>1</sub>  | 1.401(2) |
| N <sub>3</sub> | C <sub>2</sub>  | 1.379(2)   | C <sub>2</sub>  | C <sub>3</sub>  | 1.387(2) |
| N <sub>4</sub> | N <sub>3</sub>  | 1.239(2)   | C <sub>5</sub>  | C <sub>4</sub>  | 1.493(2) |
| N <sub>4</sub> | N <sub>5</sub>  | 1.117(2)   |                 |                 |          |

**Table 10: Bond Angles for 7.**

| Atom            | Atom            | Atom            | Angle/°    | Atom           | Atom            | Atom            | Angle/°    |
|-----------------|-----------------|-----------------|------------|----------------|-----------------|-----------------|------------|
| C <sub>6</sub>  | O <sub>5</sub>  | N <sub>9</sub>  | 106.63(13) | O <sub>7</sub> | N <sub>11</sub> | N <sub>10</sub> | 116.05(17) |
| O <sub>1</sub>  | N <sub>1</sub>  | C <sub>1</sub>  | 118.23(15) | N <sub>7</sub> | C <sub>1</sub>  | N <sub>1</sub>  | 117.77(16) |
| O <sub>2</sub>  | N <sub>1</sub>  | O <sub>1</sub>  | 124.38(17) | N <sub>7</sub> | C <sub>1</sub>  | C <sub>2</sub>  | 113.80(15) |
| O <sub>2</sub>  | N <sub>1</sub>  | C <sub>1</sub>  | 117.38(16) | C <sub>2</sub> | C <sub>1</sub>  | N <sub>1</sub>  | 128.33(16) |
| O <sub>3</sub>  | N <sub>2</sub>  | C <sub>3</sub>  | 116.24(15) | N <sub>3</sub> | C <sub>2</sub>  | C <sub>1</sub>  | 121.49(16) |
| O <sub>4</sub>  | N <sub>2</sub>  | O <sub>3</sub>  | 124.59(16) | N <sub>3</sub> | C <sub>2</sub>  | C <sub>3</sub>  | 136.51(17) |
| O <sub>4</sub>  | N <sub>2</sub>  | C <sub>3</sub>  | 119.14(16) | C <sub>3</sub> | C <sub>2</sub>  | C <sub>1</sub>  | 101.92(15) |
| N <sub>4</sub>  | N <sub>3</sub>  | C <sub>2</sub>  | 122.62(16) | N <sub>6</sub> | C <sub>3</sub>  | N <sub>2</sub>  | 122.52(15) |
| N <sub>5</sub>  | N <sub>4</sub>  | N <sub>3</sub>  | 166.41(19) | N <sub>6</sub> | C <sub>3</sub>  | C <sub>2</sub>  | 108.53(15) |
| N <sub>7</sub>  | N <sub>6</sub>  | C <sub>3</sub>  | 110.90(13) | C <sub>2</sub> | C <sub>3</sub>  | N <sub>2</sub>  | 128.71(16) |
| N <sub>7</sub>  | N <sub>6</sub>  | C <sub>4</sub>  | 116.97(14) | N <sub>6</sub> | C <sub>4</sub>  | C <sub>5</sub>  | 113.10(14) |
| C <sub>3</sub>  | N <sub>6</sub>  | C <sub>4</sub>  | 131.93(14) | N <sub>8</sub> | C <sub>5</sub>  | C <sub>4</sub>  | 119.43(14) |
| C <sub>1</sub>  | N <sub>7</sub>  | N <sub>6</sub>  | 104.84(14) | N <sub>9</sub> | C <sub>5</sub>  | N <sub>8</sub>  | 116.24(15) |
| C <sub>6</sub>  | N <sub>8</sub>  | C <sub>5</sub>  | 102.17(14) | N <sub>9</sub> | C <sub>5</sub>  | C <sub>4</sub>  | 124.33(15) |
| C <sub>5</sub>  | N <sub>9</sub>  | O <sub>5</sub>  | 102.60(13) | O <sub>5</sub> | C <sub>6</sub>  | N <sub>10</sub> | 111.36(15) |
| N <sub>11</sub> | N <sub>10</sub> | C <sub>6</sub>  | 116.63(15) | N <sub>8</sub> | C <sub>6</sub>  | O <sub>5</sub>  | 112.36(15) |
| O <sub>6</sub>  | N <sub>11</sub> | O <sub>7</sub>  | 119.55(16) | N <sub>8</sub> | C <sub>6</sub>  | N <sub>10</sub> | 136.25(16) |
| O <sub>6</sub>  | N <sub>11</sub> | N <sub>10</sub> | 124.40(15) |                |                 |                 |            |



**Table 11: Crystal data and structure refinement for Compound 9.**

|                                             |                                                               |
|---------------------------------------------|---------------------------------------------------------------|
| Identification code                         | tatotdk_0m_a                                                  |
| Empirical formula                           | C <sub>9</sub> H <sub>9</sub> N <sub>19</sub> O <sub>7</sub>  |
| Formula weight                              | 495.35                                                        |
| Temperature/K                               | 310(2)                                                        |
| Crystal system                              | triclinic                                                     |
| Space group                                 | P-1                                                           |
| a/Å                                         | 5.9663(7)                                                     |
| b/Å                                         | 12.5080(15)                                                   |
| c/Å                                         | 13.4585(17)                                                   |
| α/°                                         | 75.226(4)                                                     |
| β/°                                         | 80.633(4)                                                     |
| γ/°                                         | 77.189(4)                                                     |
| Volume/Å <sup>3</sup>                       | 941.0(2)                                                      |
| Z                                           | 2                                                             |
| ρ <sub>calc</sub> /cm <sup>3</sup>          | 1.748                                                         |
| μ/mm <sup>-1</sup>                          | 0.151                                                         |
| F(000)                                      | 504.0                                                         |
| Crystal size/mm <sup>3</sup>                | 0.16 × 0.14 × 0.12                                            |
| Radiation                                   | MoKα (λ = 0.71073)                                            |
| 2θ range for data collection/°              | 3.43 to 51.384                                                |
| Index ranges                                | -7 ≤ h ≤ 7, -15 ≤ k ≤ 15, -16 ≤ l ≤ 16                        |
| Reflections collected                       | 27517                                                         |
| Independent reflections                     | 3580 [R <sub>int</sub> = 0.0661, R <sub>sigma</sub> = 0.0379] |
| Data/restraints/parameters                  | 3580/0/316                                                    |
| Goodness-of-fit on F <sup>2</sup>           | 0.877                                                         |
| Final R indexes [I >= 2σ (I)]               | R <sub>1</sub> = 0.0532, wR <sub>2</sub> = 0.1429             |
| Final R indexes [all data]                  | R <sub>1</sub> = 0.0954, wR <sub>2</sub> = 0.1784             |
| Largest diff. peak/hole / e Å <sup>-3</sup> | 0.26/-0.31                                                    |
| CCDC number                                 | 2287542                                                       |

**Table 12: Fractional Atomic Coordinates (×104) and Equivalent Isotropic Displacement Parameters (Å<sup>2</sup>×103) for Compound 9. U<sub>eq</sub> is defined as 1/3 of of the trace of the orthogonalised UIJ tensor.**

| Atom | x       | y          | z          | U(eq)   |
|------|---------|------------|------------|---------|
| O5   | 1121(4) | 7454.3(18) | 2508.7(17) | 68.4(6) |
| N15  | 6526(4) | 2266.1(19) | 984.9(19)  | 55.5(6) |

|     |          |            |            |           |
|-----|----------|------------|------------|-----------|
| N6  | 637(4)   | 3867(2)    | 3858.2(19) | 57.3(7)   |
| N11 | 6345(5)  | 6818(2)    | 1068.9(19) | 58.2(7)   |
| O7  | 7864(5)  | 7351(2)    | 578(2)     | 86.4(8)   |
| O6  | 6637(4)  | 5798.7(18) | 1117(2)    | 84.8(8)   |
| N7  | 2202(4)  | 4036(2)    | 4376(2)    | 59.3(7)   |
| N13 | 4597(4)  | 3751(2)    | 1406.5(19) | 58.5(7)   |
| N8  | 2550(5)  | 5759(2)    | 2219.4(19) | 58.3(7)   |
| O1  | 5493(5)  | 3730(2)    | 5611(2)    | 89.7(8)   |
| N19 | 7947(5)  | 1310(2)    | 686(2)     | 62.8(7)   |
| O4  | -2627(6) | 2953(3)    | 3246(2)    | 93.6(9)   |
| N10 | 4531(5)  | 7387(2)    | 1518(2)    | 64.8(7)   |
| N1  | 5005(5)  | 2895(3)    | 5466(2)    | 66.7(7)   |
| N16 | 4402(5)  | 1007(2)    | 1442(2)    | 70.6(8)   |
| N14 | 3133(5)  | 2956(2)    | 1767(2)    | 64.6(7)   |
| N12 | 8379(5)  | 3841(2)    | 510(2)     | 71.6(8)   |
| N2  | -919(6)  | 2319(3)    | 3576(2)    | 75.3(8)   |
| N9  | -469(5)  | 6768(2)    | 3037(2)    | 71.5(8)   |
| O2  | 6058(5)  | 1938(2)    | 5755(2)    | 97.4(9)   |
| N3  | 2575(7)  | 961(3)     | 5058(3)    | 86.2(10)  |
| C1  | 3118(5)  | 3016(3)    | 4879(2)    | 55.2(7)   |
| C6  | 2875(6)  | 6798(2)    | 2051(2)    | 56.3(8)   |
| O3  | -377(6)  | 1322(3)    | 3557(3)    | 112.9(11) |
| C7  | 6639(5)  | 3339(2)    | 938(2)     | 53.2(7)   |
| C2  | 2173(6)  | 2161(3)    | 4700(2)    | 60.5(8)   |
| C3  | 581(6)   | 2757(3)    | 4033(2)    | 58.4(8)   |
| N18 | 7037(6)  | -476(2)    | 895(3)     | 94.7(11)  |
| C8  | 4432(6)  | 2088(3)    | 1465(3)    | 60.0(8)   |
| C5  | 480(6)   | 5796(3)    | 2836(2)    | 61.0(8)   |
| N17 | 2640(6)  | 384(3)     | 1812(3)    | 100.1(12) |
| C9  | 6551(6)  | 581(3)     | 985(3)     | 66.1(9)   |
| C4  | -729(6)  | 4828(3)    | 3202(3)    | 71.4(9)   |
| N4  | 2948(8)  | 643(3)     | 5880(4)    | 106.7(13) |
| N5  | 3368(14) | 131(5)     | 6710(4)    | 187(3)    |

**Table 13: Anisotropic Displacement Parameters ( $\text{\AA}^2 \times 10^3$ ) for 9. The Anisotropic displacement factor exponent takes the form:  $-2\pi^2[h^2a^{*2}U_{11}+2hka^*b^*U_{12}+\dots]$ .**

| Atom | U <sub>11</sub> | U <sub>22</sub> | U <sub>33</sub> | U <sub>12</sub> | U <sub>13</sub> | U <sub>23</sub> |
|------|-----------------|-----------------|-----------------|-----------------|-----------------|-----------------|
| O5   | 72.5(16)        | 52.2(13)        | 72.5(15)        | 5.4(11)         | 6.9(12)         | -23.7(11)       |
| N15  | 53.6(16)        | 44.6(14)        | 67.6(17)        | 1.4(11)         | -3.6(13)        | -22.5(12)       |
| N6   | 54.8(16)        | 56.9(16)        | 60.8(16)        | -9.6(13)        | 2.2(13)         | -20.3(13)       |
| N11  | 75.1(19)        | 42.0(14)        | 54.6(15)        | -2.9(13)        | 2.1(14)         | -18.0(12)       |
| O7   | 101(2)          | 54.3(14)        | 94.5(19)        | -14.2(14)       | 32.8(16)        | -27.8(13)       |

|     |          |          |          |           |           |           |
|-----|----------|----------|----------|-----------|-----------|-----------|
| O6  | 87.3(18) | 45.6(14) | 119(2)   | -8.6(12)  | 23.7(16)  | -38.7(13) |
| N7  | 57.4(16) | 55.8(16) | 68.3(17) | -10.2(13) | -4.2(14)  | -22.5(13) |
| N13 | 60.2(16) | 50.2(15) | 65.3(16) | 2.7(13)   | -3.2(13)  | -26.2(12) |
| N8  | 63.8(17) | 49.7(15) | 58.7(15) | -0.4(12)  | -3.7(13)  | -17.8(12) |
| O1  | 89(2)    | 78.4(18) | 115(2)   | -28.3(15) | -30.4(17) | -22.6(16) |
| N19 | 57.3(16) | 46.5(14) | 83.2(19) | 2.8(12)   | -0.5(14)  | -27.0(13) |
| O4  | 84(2)    | 122(3)   | 86(2)    | -39.0(19) | -15.0(16) | -23.1(17) |
| N10 | 77.9(19) | 42.9(14) | 66.5(17) | 1.4(14)   | 9.2(15)   | -20.7(13) |
| N1  | 59.3(18) | 64.8(19) | 73.8(19) | -10.0(15) | -3.6(15)  | -15.2(15) |
| N16 | 57.4(18) | 55.7(17) | 100(2)   | -5.9(14)  | 0.3(16)   | -29.5(15) |
| N14 | 56.5(16) | 63.5(17) | 78.4(19) | -3.5(14)  | -3.5(14)  | -33.0(14) |
| N12 | 68.2(19) | 49.7(16) | 94(2)    | -4.9(14)  | 13.6(16)  | -30.1(14) |
| N2  | 81(2)    | 90(3)    | 66.5(19) | -35(2)    | 4.8(17)   | -30.7(17) |
| N9  | 67.4(19) | 63.6(18) | 74.6(19) | 2.0(15)   | 3.9(15)   | -18.9(15) |
| O2  | 90(2)    | 77(2)    | 120(2)   | 0.0(16)   | -35.0(18) | -12.8(17) |
| N3  | 122(3)   | 57(2)    | 85(2)    | -16.7(19) | -20(2)    | -20.7(18) |
| C1  | 53.1(18) | 53.2(19) | 59.3(18) | -9.5(15)  | 2.8(15)   | -18.7(14) |
| C6  | 67(2)    | 46.8(18) | 51.1(17) | 6.8(15)   | -3.9(15)  | -20.4(14) |
| O3  | 144(3)   | 95(2)    | 126(3)   | -50(2)    | -7(2)     | -54(2)    |
| C7  | 56.7(19) | 45.8(17) | 56.2(18) | 2.4(14)   | -6.1(15)  | -20.0(14) |
| C2  | 68(2)    | 54.6(19) | 59.4(19) | -14.0(16) | 8.0(17)   | -20.6(15) |
| C3  | 62(2)    | 62(2)    | 56.9(19) | -19.2(16) | 4.9(16)   | -24.8(15) |
| N18 | 77(2)    | 50.5(17) | 157(3)   | -7.1(15)  | 10(2)     | -44.0(19) |
| C8  | 53.9(19) | 53.3(19) | 74(2)    | -0.7(15)  | -3.3(16)  | -26.6(16) |
| C5  | 61(2)    | 57(2)    | 60(2)    | 2.8(16)   | -7.2(16)  | -15.9(15) |
| N17 | 68(2)    | 74(2)    | 170(4)   | -22.1(18) | 17(2)     | -55(2)    |
| C9  | 59(2)    | 47.0(18) | 92(3)    | -0.9(16)  | -6.4(18)  | -24.4(17) |
| C4  | 63(2)    | 68(2)    | 81(2)    | -6.0(18)  | -10.7(18) | -16.3(18) |
| N4  | 150(4)   | 65(2)    | 112(3)   | -43(2)    | -21(3)    | -8(2)     |
| N5  | 300(9)   | 147(5)   | 129(5)   | -111(5)   | -78(5)    | 33(4)     |

**Table 14: Table containing bond lengths of 9.**

| Atom | Atom | Length/Å | Atom | Atom | Length/Å |
|------|------|----------|------|------|----------|
| O5   | C6   | 1.347(3) | N10  | C6   | 1.362(4) |
| O5   | N9   | 1.404(4) | N1   | O2   | 1.220(4) |
| N15  | C7   | 1.344(4) | N1   | C1   | 1.438(4) |
| N15  | C8   | 1.347(4) | N16  | C8   | 1.365(4) |
| N15  | N19  | 1.413(3) | N16  | C9   | 1.383(4) |
| N6   | N7   | 1.333(4) | N16  | N17  | 1.398(4) |
| N6   | C3   | 1.354(4) | N14  | C8   | 1.302(4) |
| N6   | C4   | 1.465(4) | N12  | C7   | 1.309(4) |
| N11  | O6   | 1.233(3) | N2   | O3   | 1.223(4) |
| N11  | O7   | 1.245(3) | N2   | C3   | 1.430(4) |

|     |     |          |     |    |          |
|-----|-----|----------|-----|----|----------|
| N11 | N10 | 1.307(3) | N9  | C5 | 1.298(4) |
| N7  | C1  | 1.325(4) | N3  | N4 | 1.118(5) |
| N13 | C7  | 1.336(4) | N3  | C2 | 1.433(4) |
| N13 | N14 | 1.410(4) | C1  | C2 | 1.401(4) |
| N8  | C6  | 1.313(4) | C2  | C3 | 1.373(5) |
| N8  | C5  | 1.370(4) | N18 | C9 | 1.322(4) |
| O1  | N1  | 1.212(4) | C5  | C4 | 1.482(5) |
| N19 | C9  | 1.314(4) | N4  | N5 | 1.173(6) |
| O4  | N2  | 1.214(4) |     |    |          |

**Table 15: Table containing bond angles of compound 9.**

| Atom | Atom | Atom | Angle/°  | Atom | Atom | Atom | Angle/°  |
|------|------|------|----------|------|------|------|----------|
| C6   | O5   | N9   | 106.9(2) | N7   | C1   | C2   | 113.2(3) |
| C7   | N15  | C8   | 107.8(2) | N7   | C1   | N1   | 118.8(3) |
| C7   | N15  | N19  | 138.4(3) | C2   | C1   | N1   | 127.8(3) |
| C8   | N15  | N19  | 113.7(2) | N8   | C6   | O5   | 112.4(3) |
| N7   | N6   | C3   | 111.2(3) | N8   | C6   | N10  | 136.1(3) |
| N7   | N6   | C4   | 119.8(3) | O5   | C6   | N10  | 111.6(3) |
| C3   | N6   | C4   | 129.0(3) | N12  | C7   | N13  | 129.4(3) |
| O6   | N11  | O7   | 119.2(3) | N12  | C7   | N15  | 126.3(3) |
| O6   | N11  | N10  | 124.0(3) | N13  | C7   | N15  | 104.3(3) |
| O7   | N11  | N10  | 116.8(2) | C3   | C2   | C1   | 102.2(3) |
| C1   | N7   | N6   | 104.7(2) | C3   | C2   | N3   | 123.9(3) |
| C7   | N13  | N14  | 113.3(2) | C1   | C2   | N3   | 133.9(3) |
| C6   | N8   | C5   | 102.1(2) | N6   | C3   | C2   | 108.7(3) |
| C9   | N19  | N15  | 100.9(2) | N6   | C3   | N2   | 123.9(3) |
| N11  | N10  | C6   | 116.4(2) | C2   | C3   | N2   | 127.5(3) |
| O1   | N1   | O2   | 124.6(3) | N14  | C8   | N15  | 114.2(3) |
| O1   | N1   | C1   | 119.2(3) | N14  | C8   | N16  | 141.2(3) |
| O2   | N1   | C1   | 116.1(3) | N15  | C8   | N16  | 104.6(3) |
| C8   | N16  | C9   | 106.8(3) | N9   | C5   | N8   | 115.7(3) |
| C8   | N16  | N17  | 129.5(3) | N9   | C5   | C4   | 120.7(3) |
| C9   | N16  | N17  | 123.7(3) | N8   | C5   | C4   | 123.5(3) |
| C8   | N14  | N13  | 100.4(2) | N19  | C9   | N18  | 126.3(3) |
| O4   | N2   | O3   | 125.0(3) | N19  | C9   | N16  | 113.9(3) |
| O4   | N2   | C3   | 118.2(3) | N18  | C9   | N16  | 119.8(3) |
| O3   | N2   | C3   | 116.8(4) | N6   | C4   | C5   | 112.0(3) |
| C5   | N9   | O5   | 103.0(2) | N3   | N4   | N5   | 168.5(5) |
| N4   | N3   | C2   | 115.0(3) |      |      |      |          |

### Isodesmic reactions:

#### Compound 4:

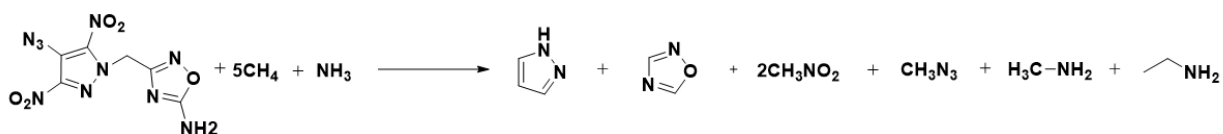

#### Compound 6:

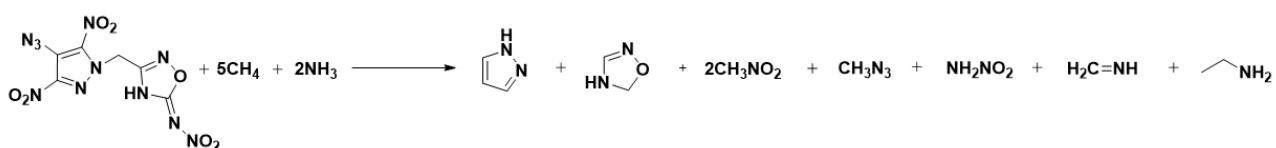

#### Compound 7-17:

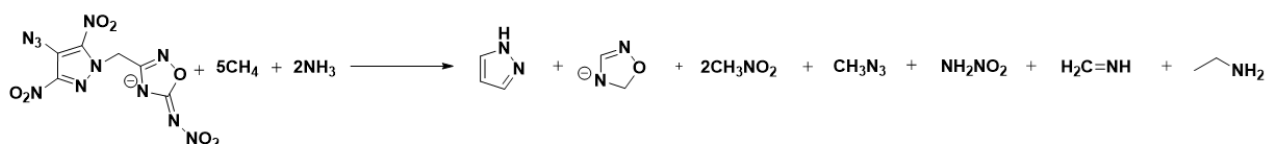

### NMR Spectra:

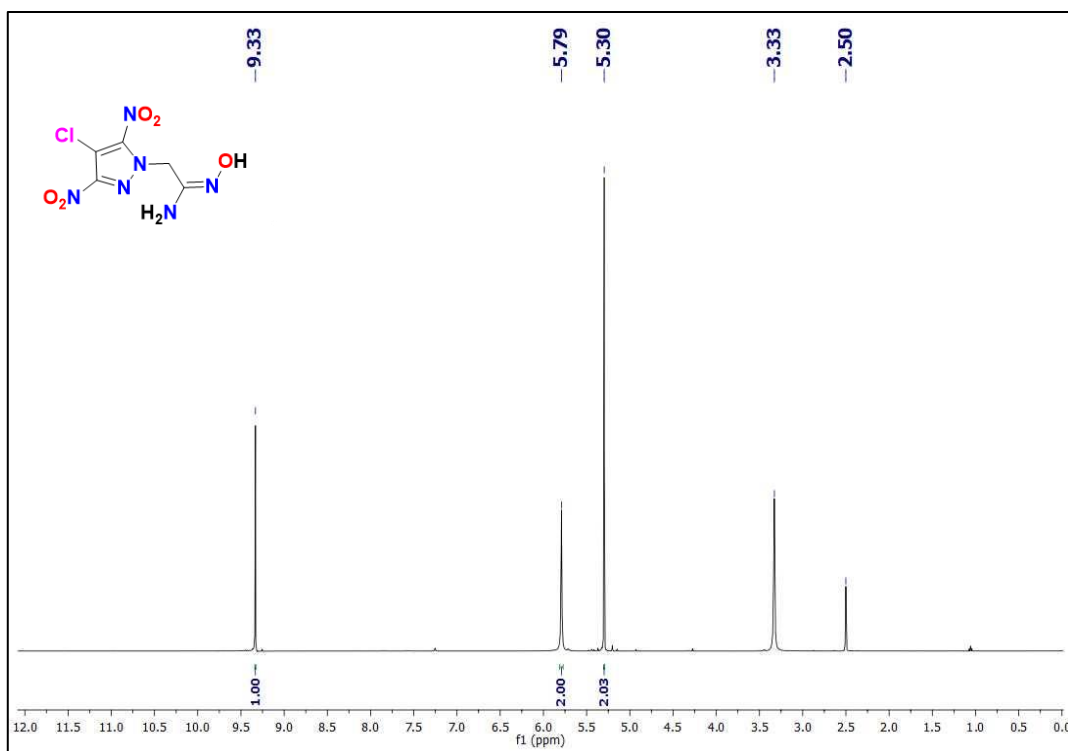

Fig.S1: <sup>1</sup>H NMR Spectra of compound 2

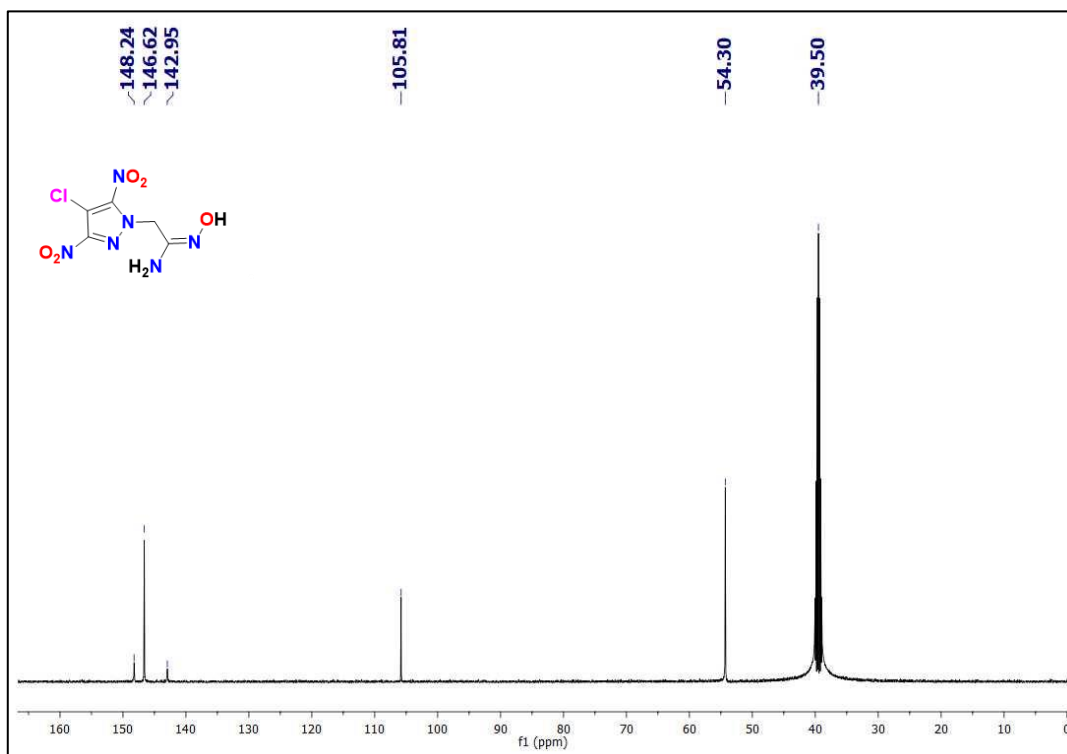

Fig.S2: <sup>13</sup>C{<sup>1</sup>H} NMR Spectra of compound 2

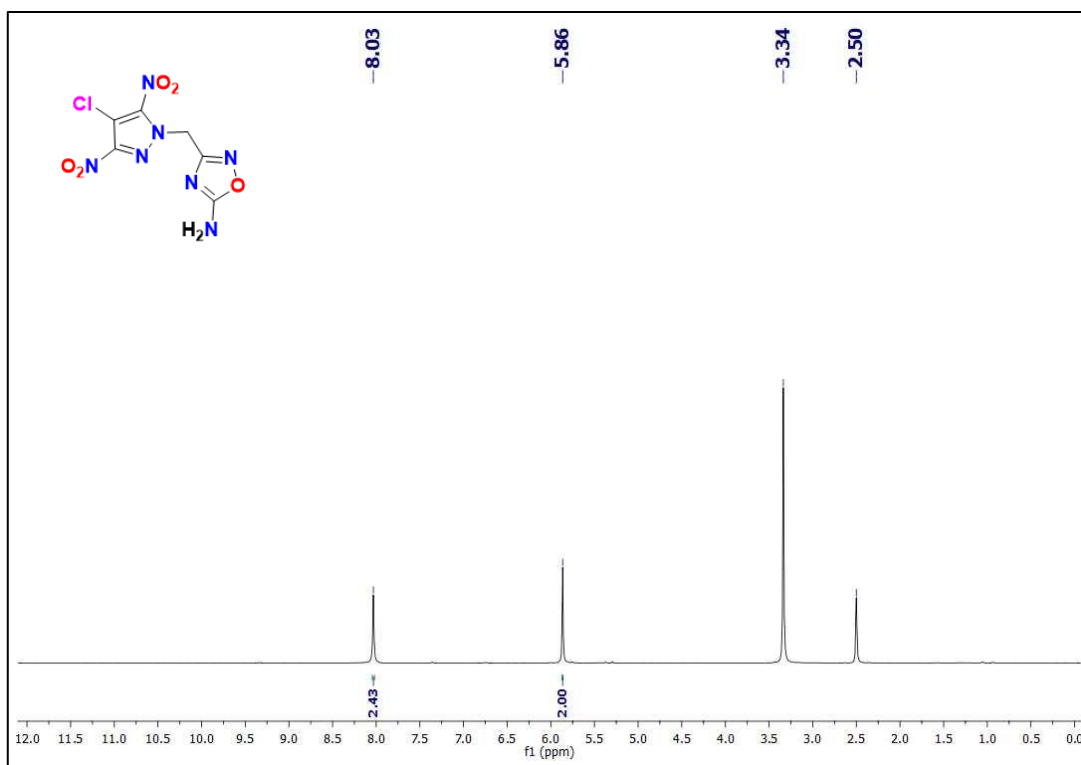

Fig.S3:  $^1\text{H}$  NMR Spectra of compound 3

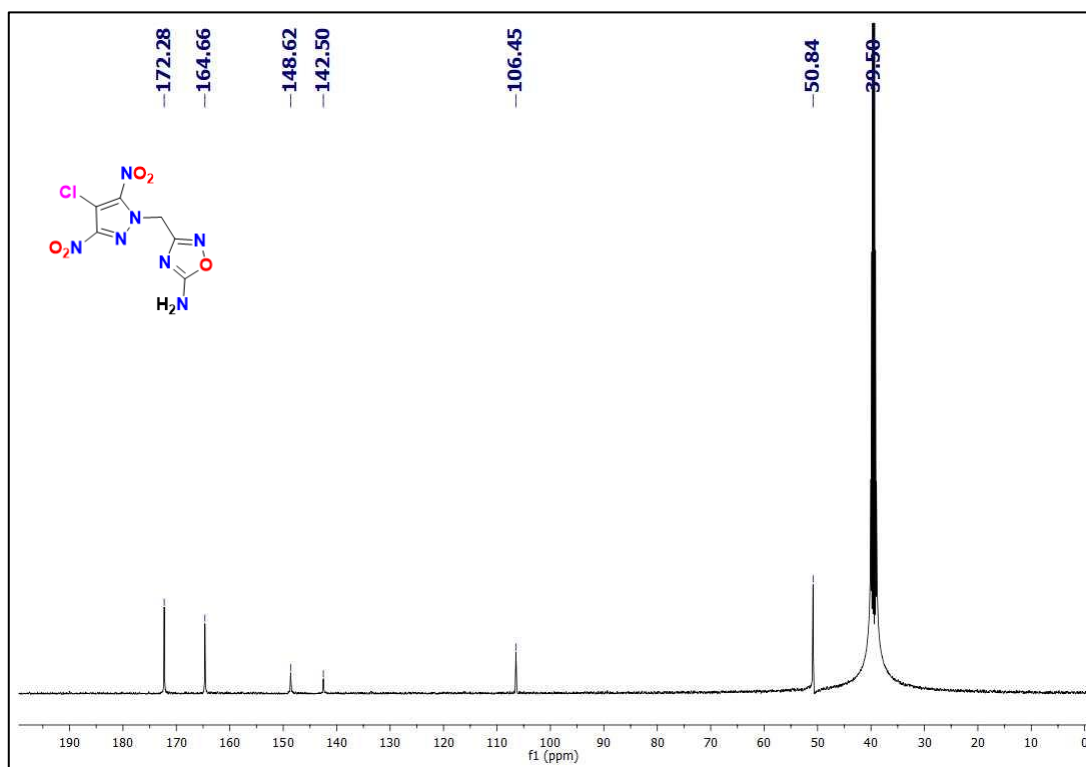

Fig.S4:  $^{13}\text{C}\{^1\text{H}\}$  NMR Spectra of compound 3

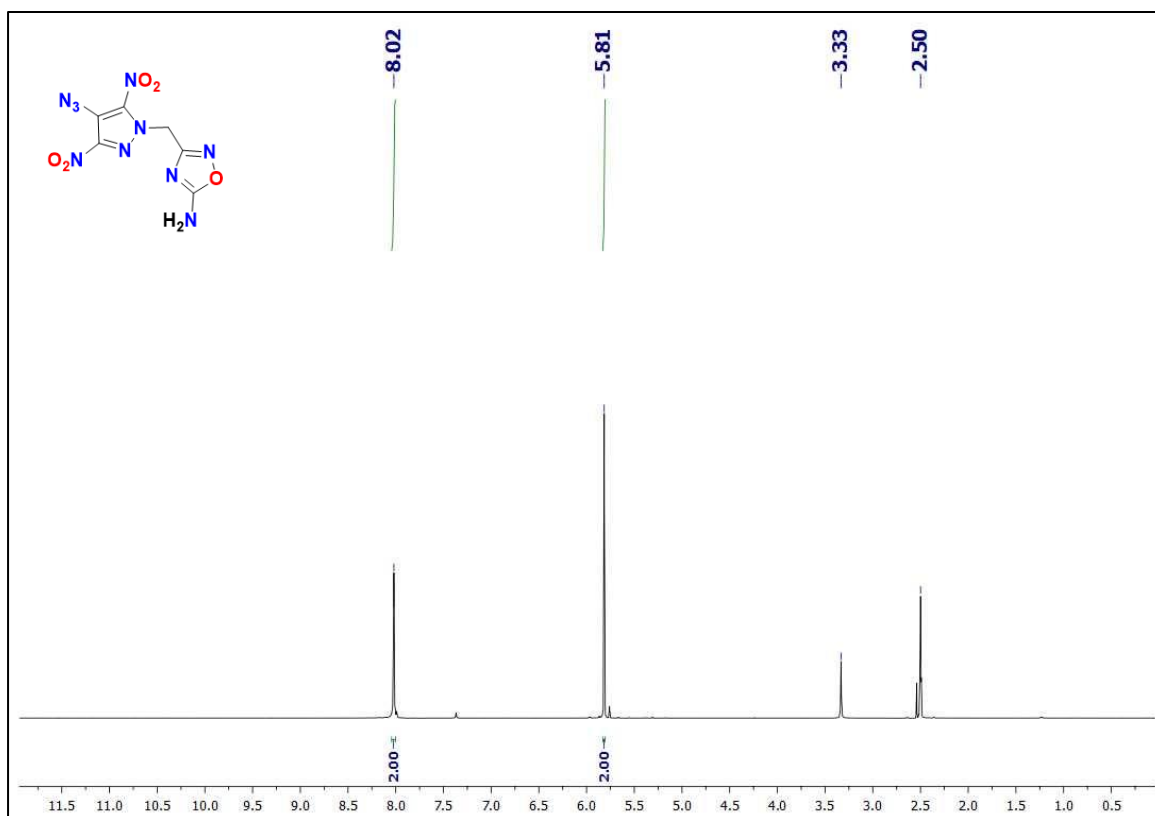

Fig.S5:  $^1\text{H NMR}$  Spectra of compound 4

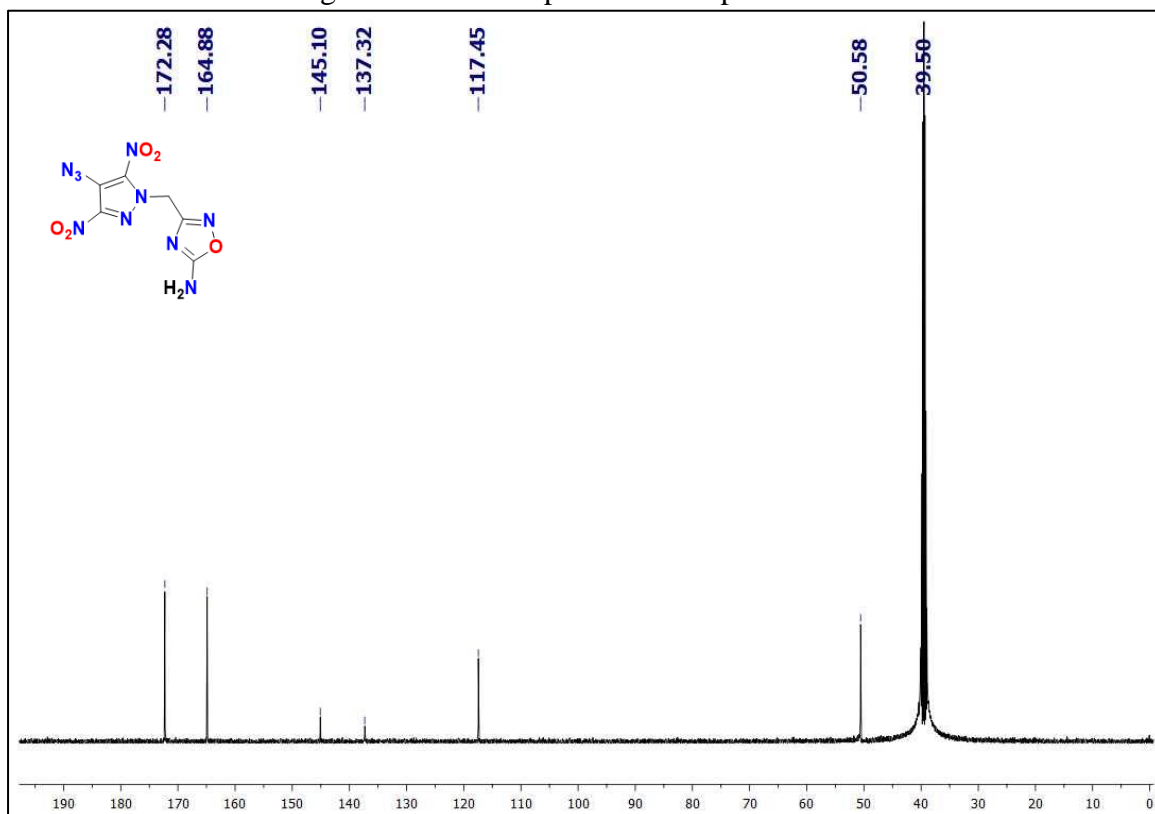

Fig.S6:  $^{13}\text{C}\{^1\text{H}\}$  NMR Spectra of compound 4



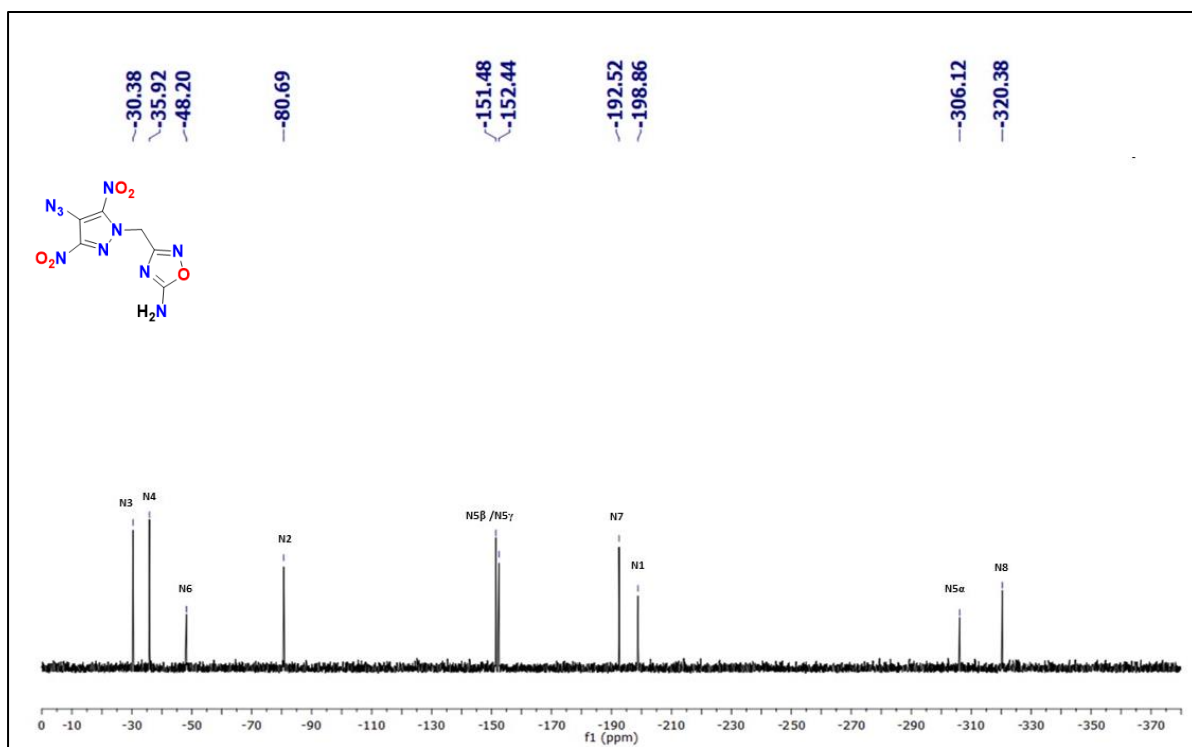

Fig.S7: <sup>15</sup>N NMR Spectra of compound 4

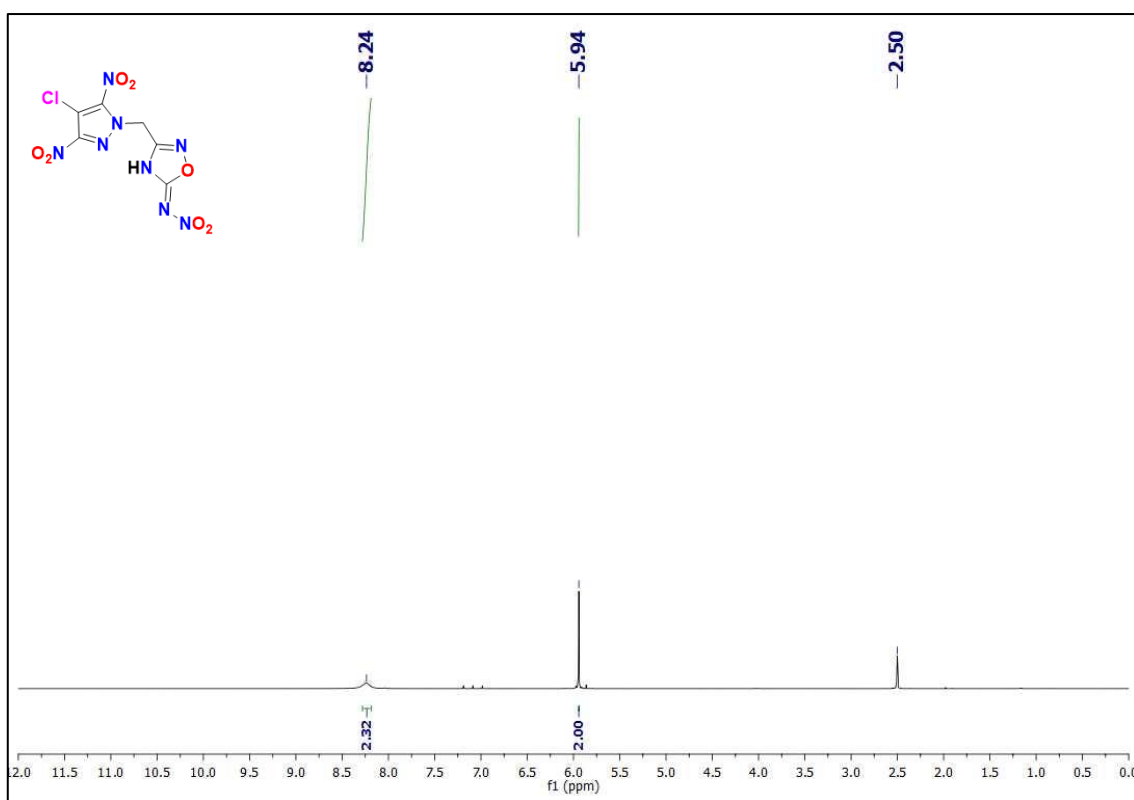

Fig.S8: <sup>1</sup>H NMR Spectra of compound 5

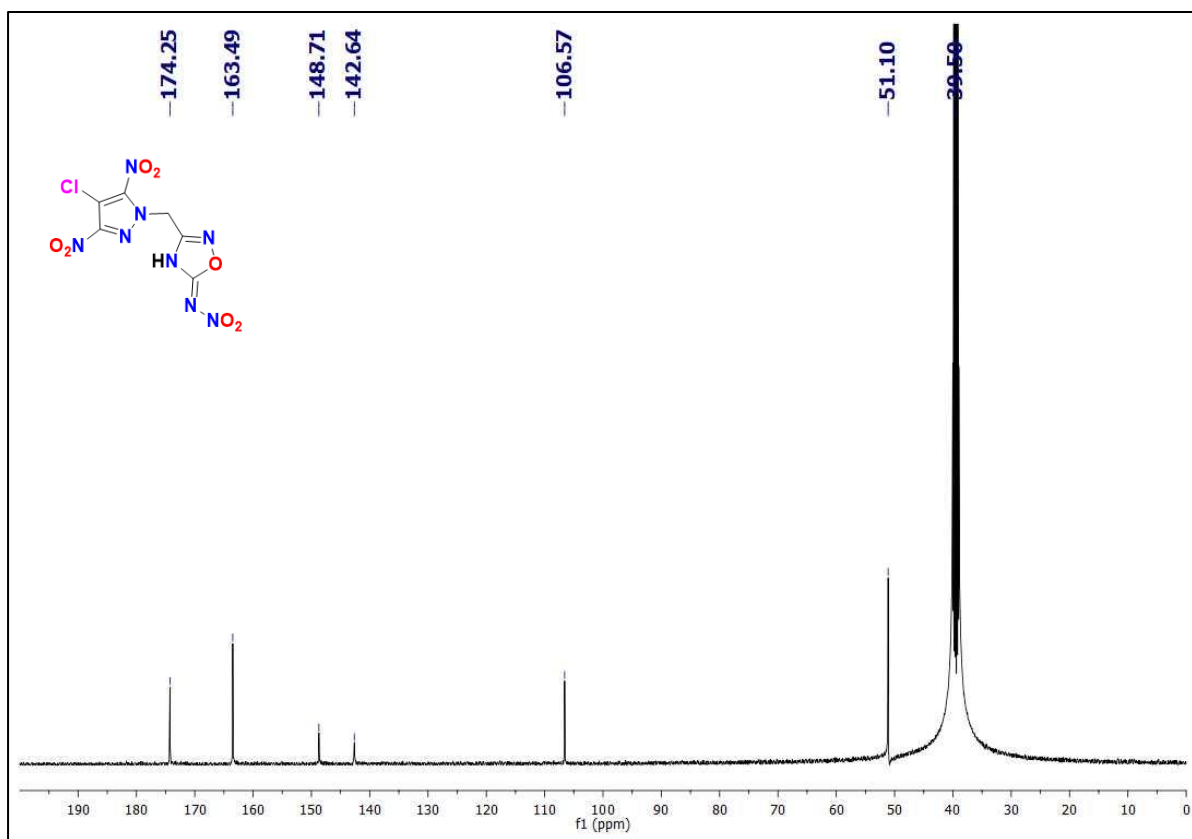

Fig.S9:  $^{13}\text{C}\{^1\text{H}\}$  NMR Spectra of compound 5

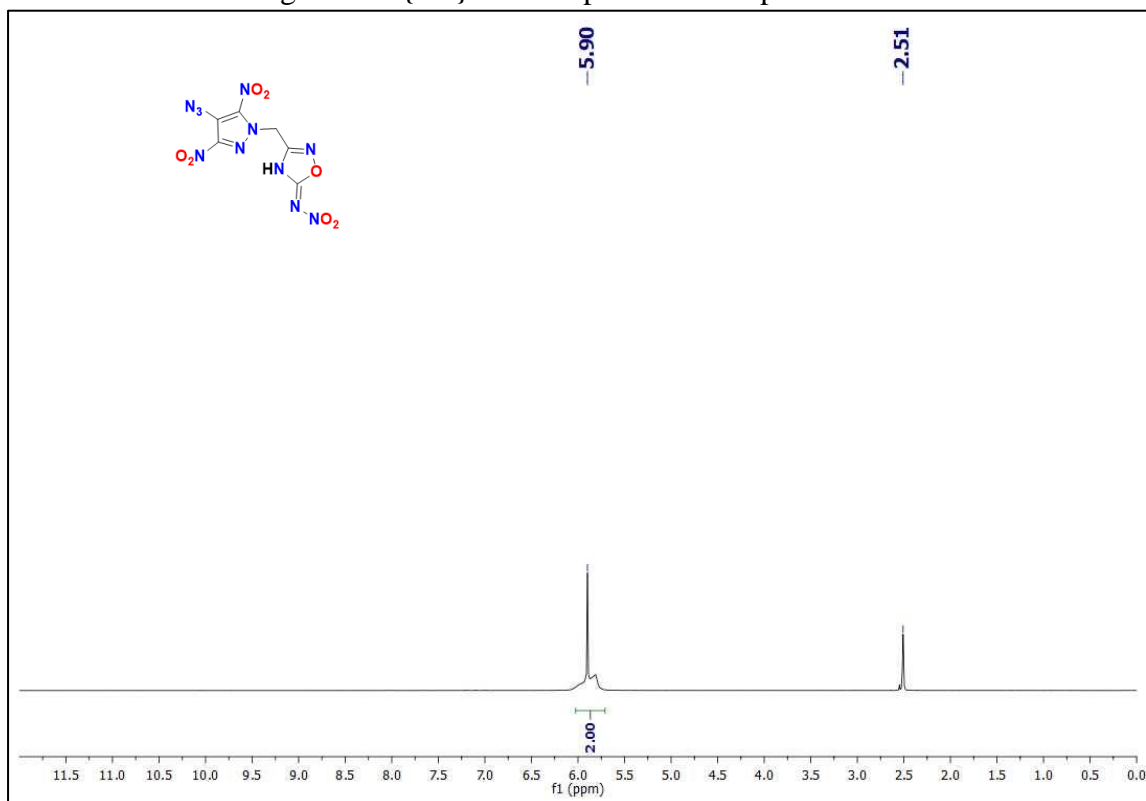

Fig.S10:  $^1\text{H}$  NMR Spectra of compound 6

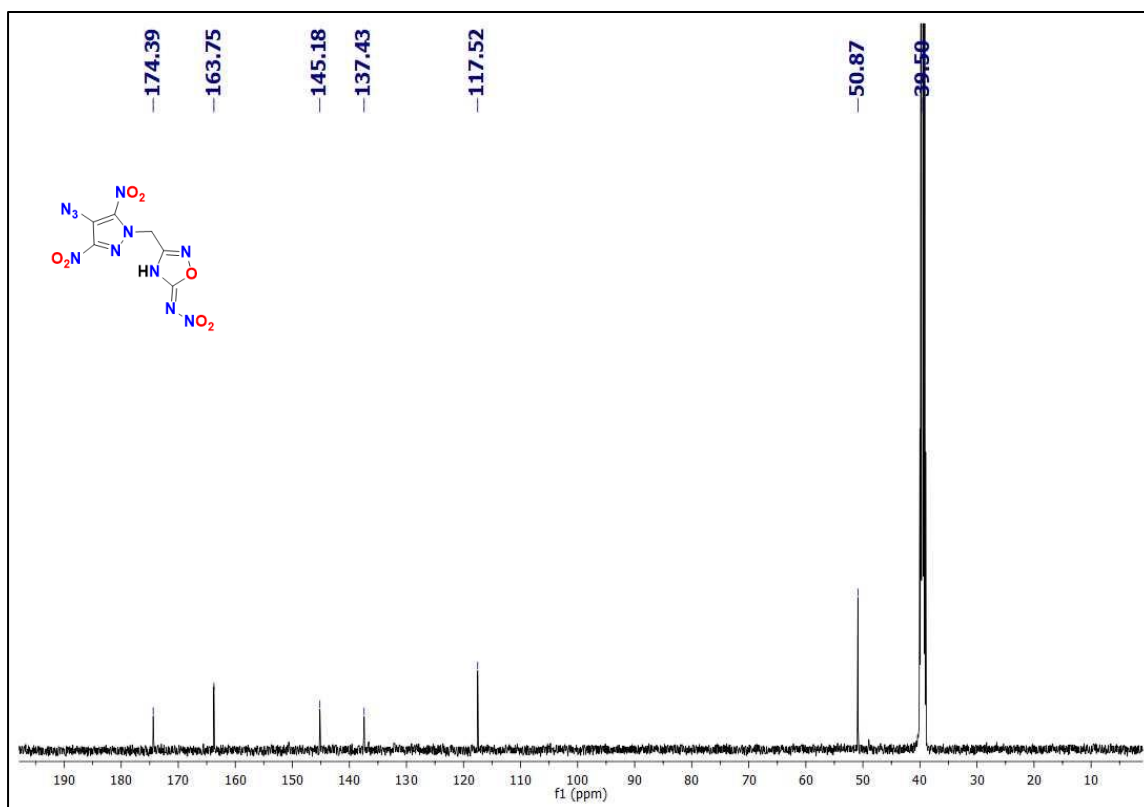

Fig.S11:  $^{13}\text{C}\{^1\text{H}\}$  NMR Spectra of compound 6

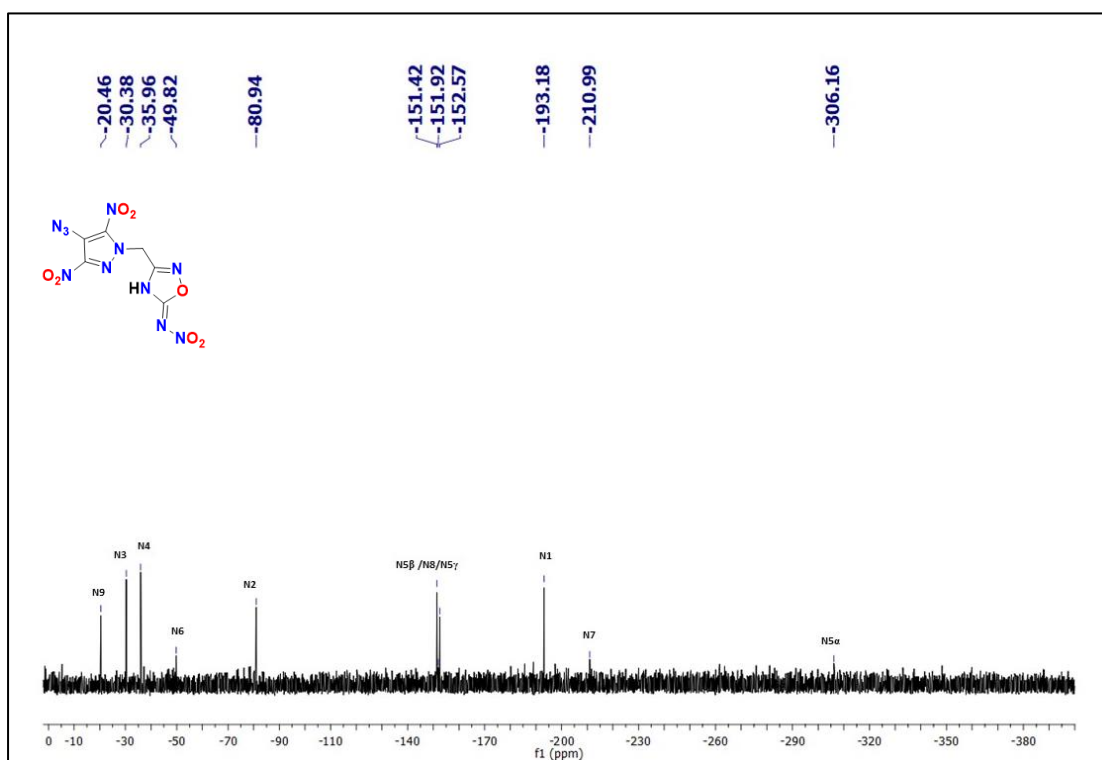

Fig.S12:  $^{15}\text{N}$  NMR Spectra of compound 6

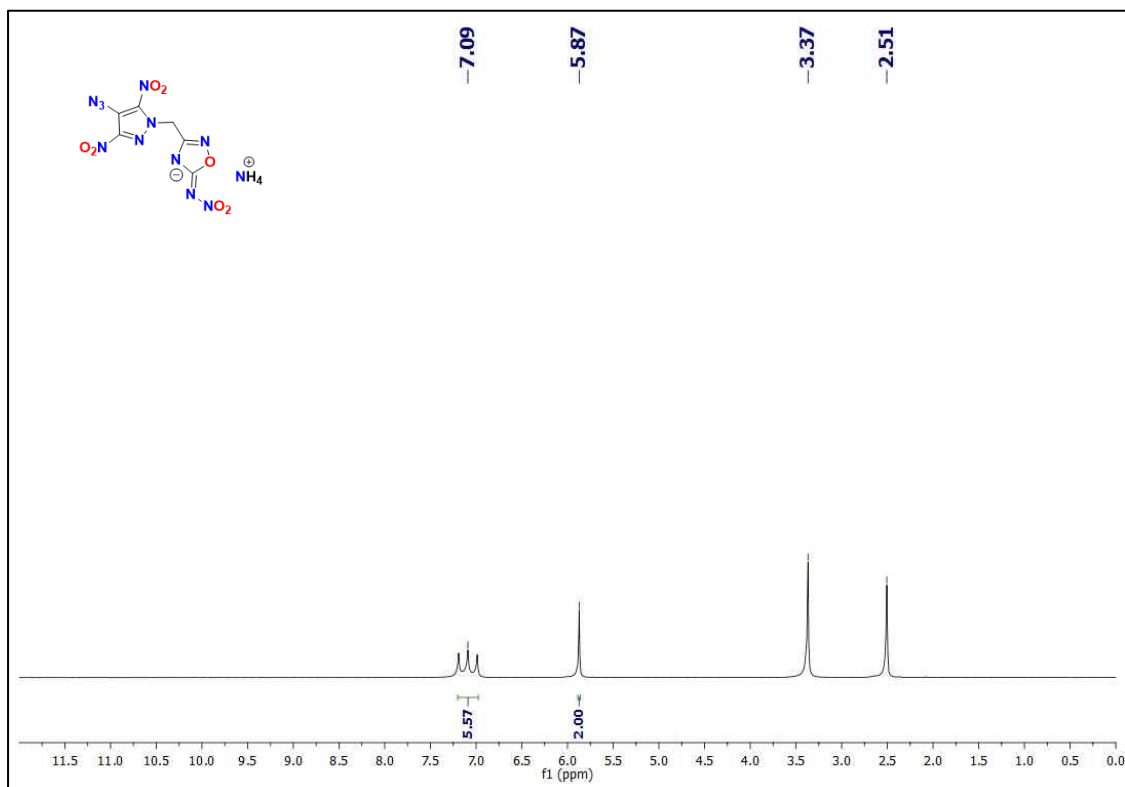

Fig.S13:  $^1\text{H}$  NMR Spectra of compound 7

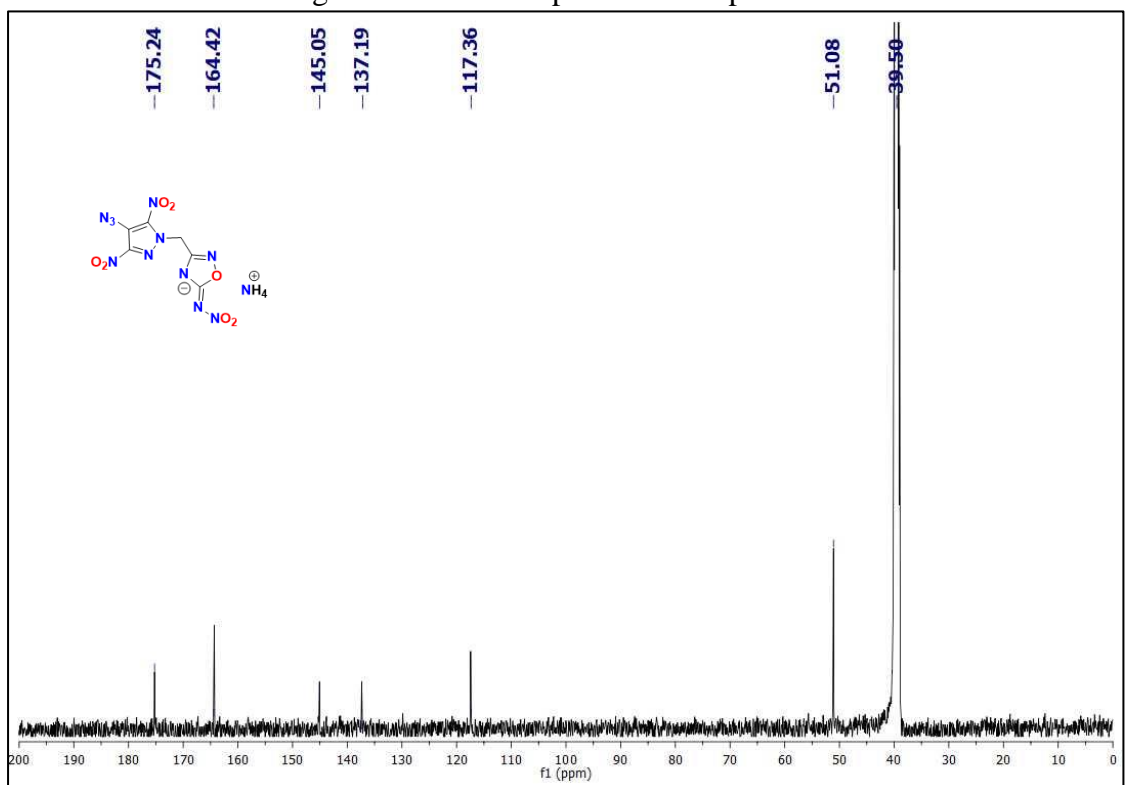

Fig.S14:  $^{13}\text{C}\{^1\text{H}\}$  NMR Spectra of compound 7

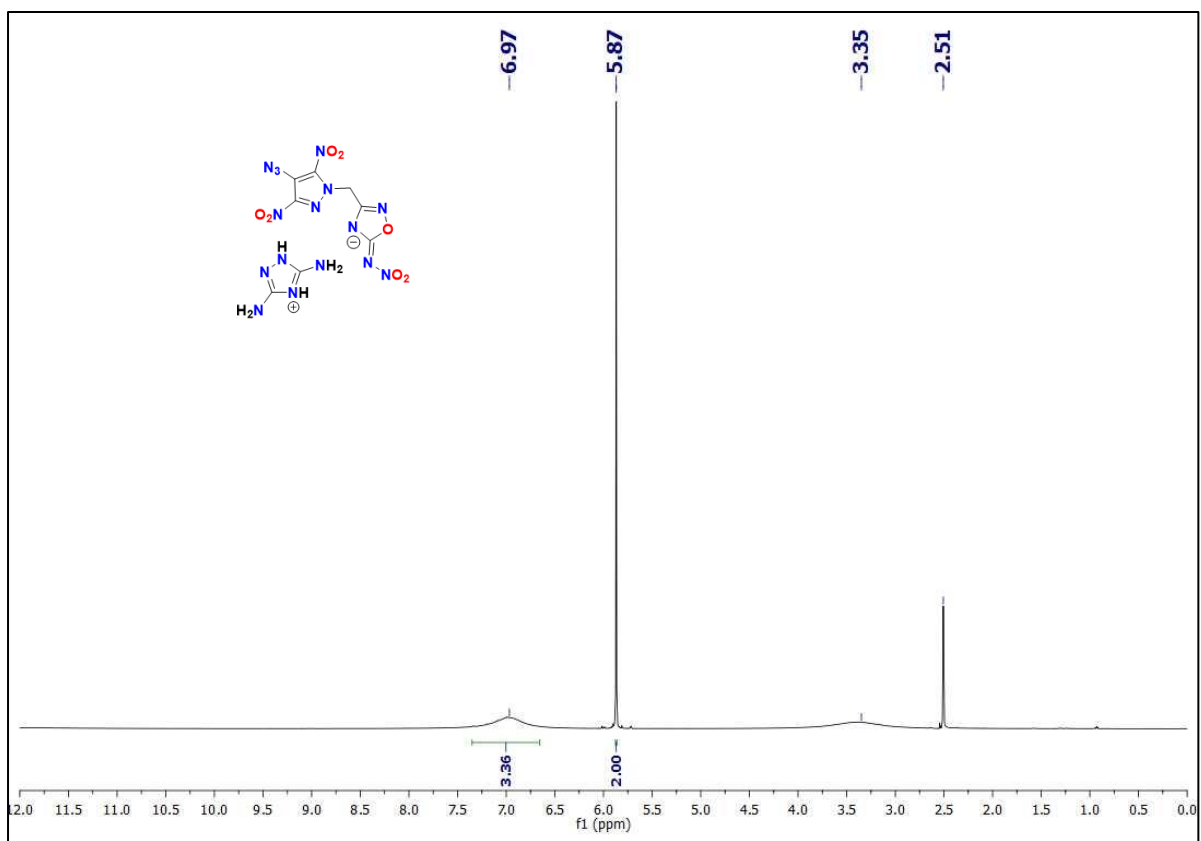

Fig.S15:  $^1\text{H}$  NMR Spectra of compound 8

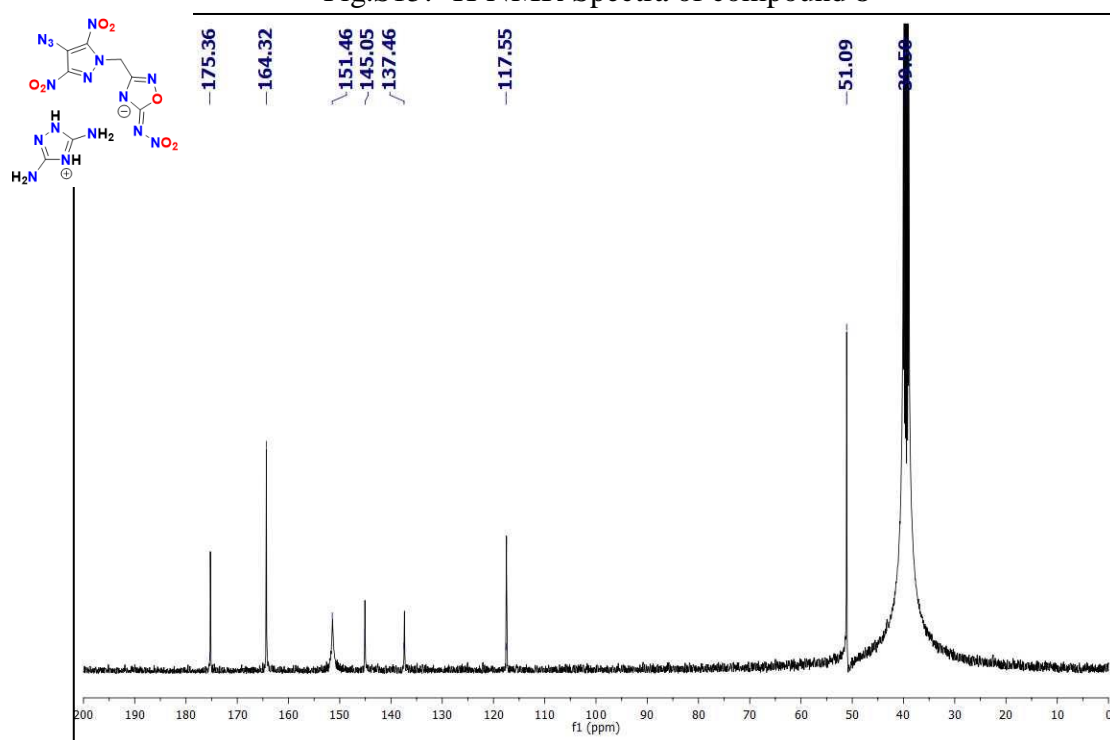

Fig.S16:  $^{13}\text{C}\{^1\text{H}\}$  NMR Spectra of compound 8

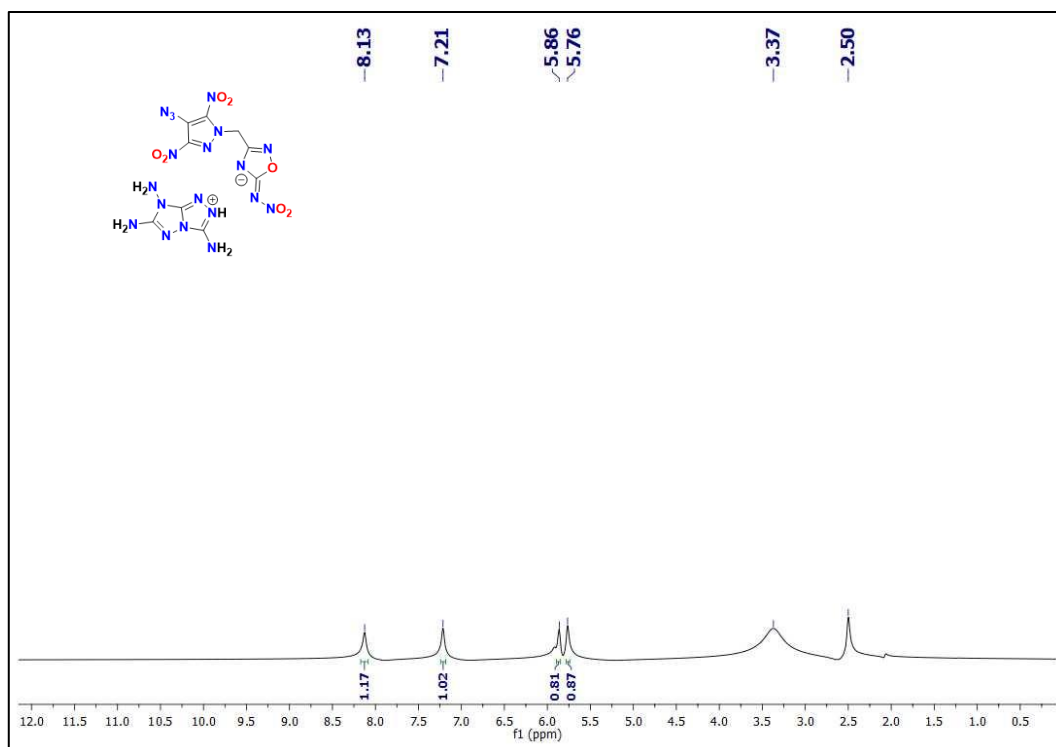

Fig.S17:  $^1\text{H}$  NMR Spectra of compound 9

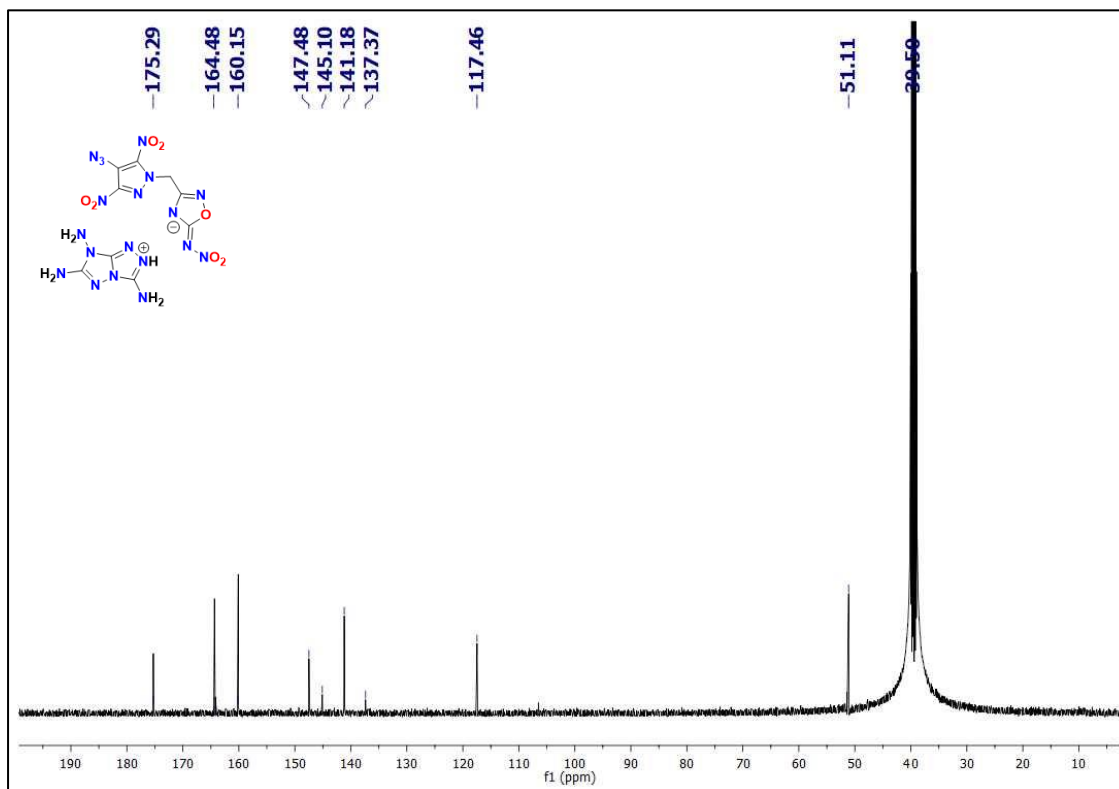

Fig.S18:  $^{13}\text{C}\{^1\text{H}\}$  NMR Spectra of compound 9

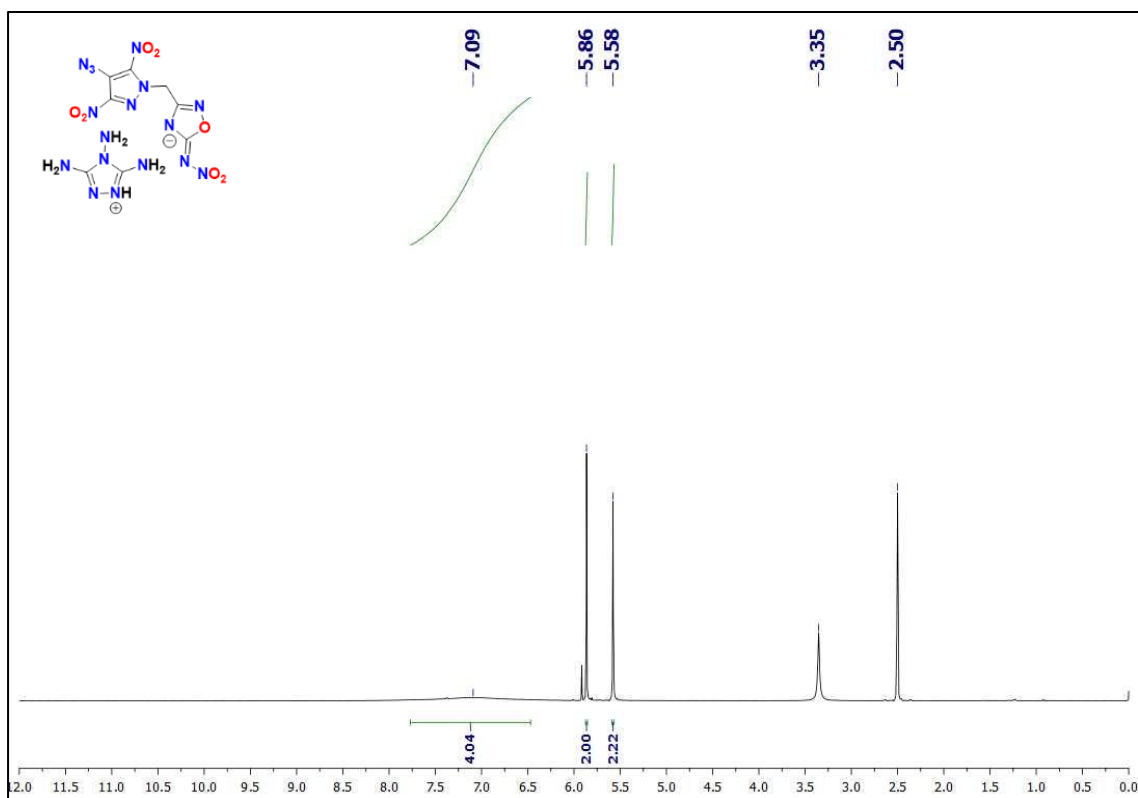

Fig.S19:  $^1\text{H}$  NMR Spectra of compound **10**

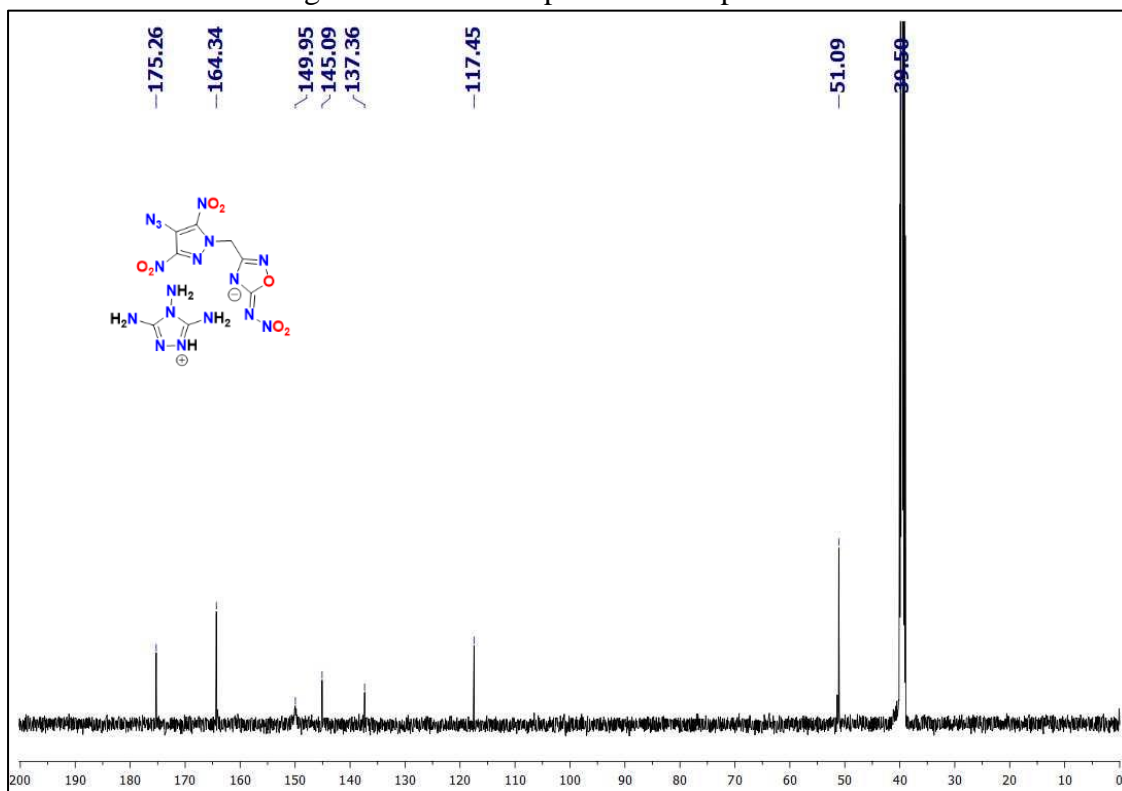

Fig.S20:  $^{13}\text{C}\{^1\text{H}\}$  NMR Spectra of compound **10**

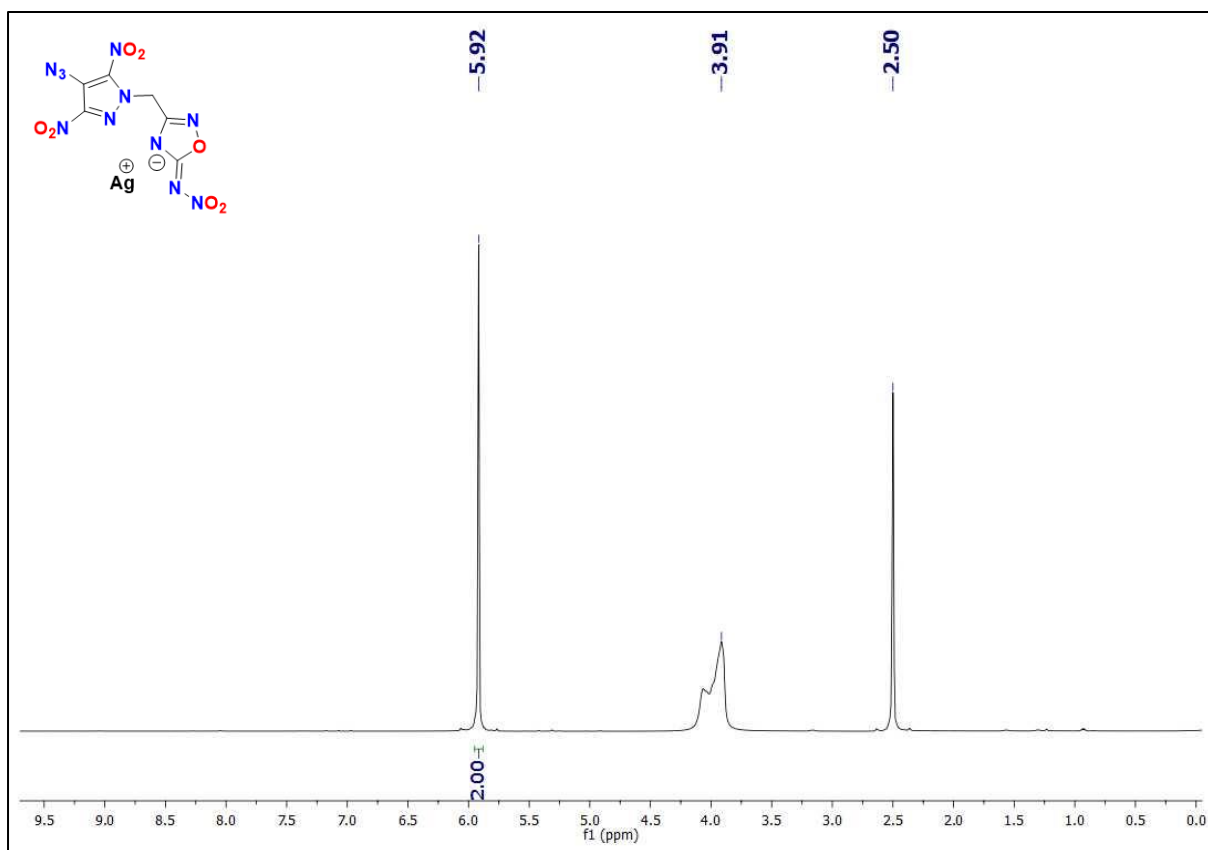

Fig.S21:  $^1\text{H}$  NMR Spectra of compound 11

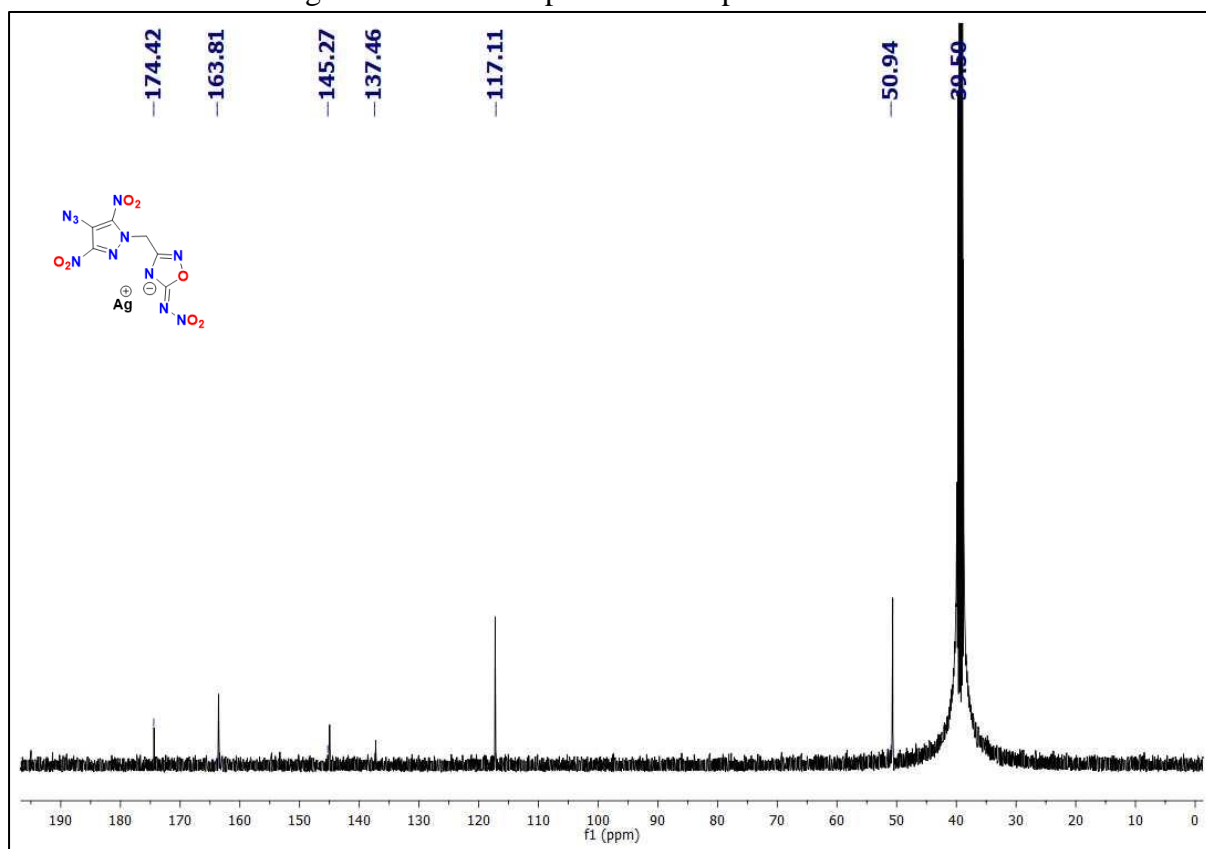

Fig.S22:  $^{13}\text{C}\{^1\text{H}\}$  NMR Spectra of compound 11



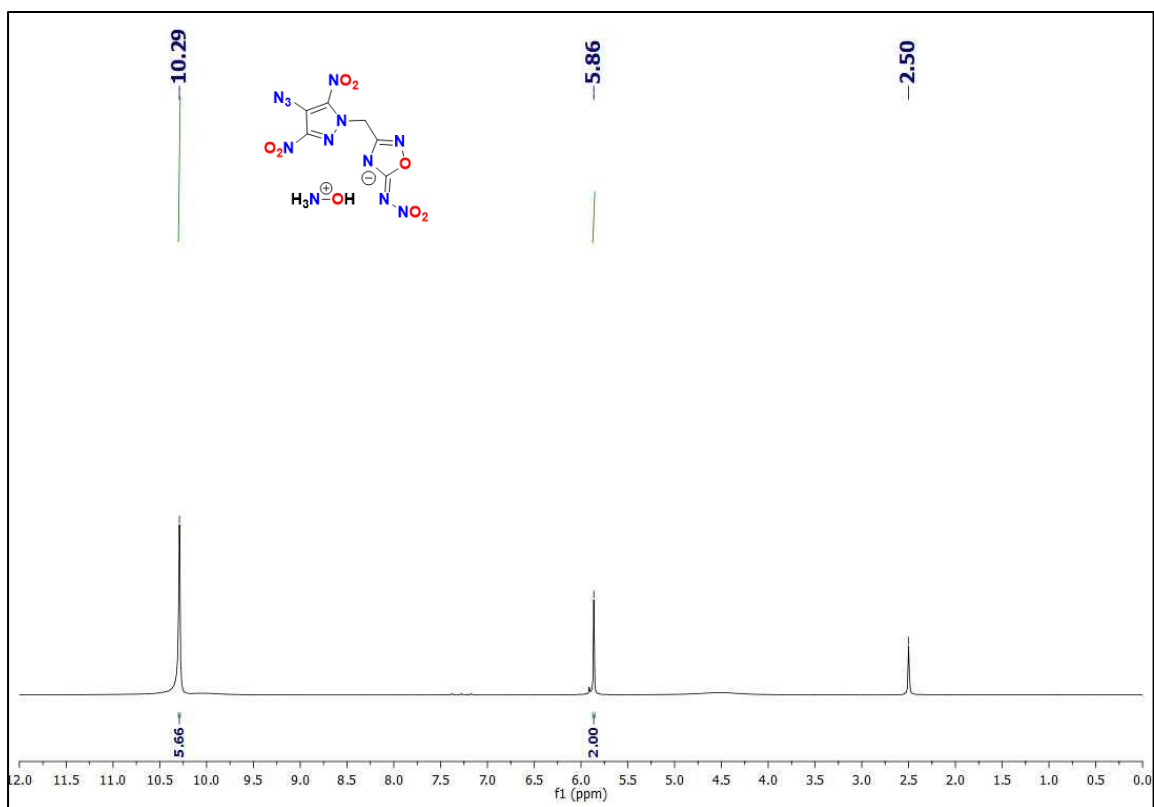

Fig.S23:  $^1\text{H}$  NMR Spectra of compound 12

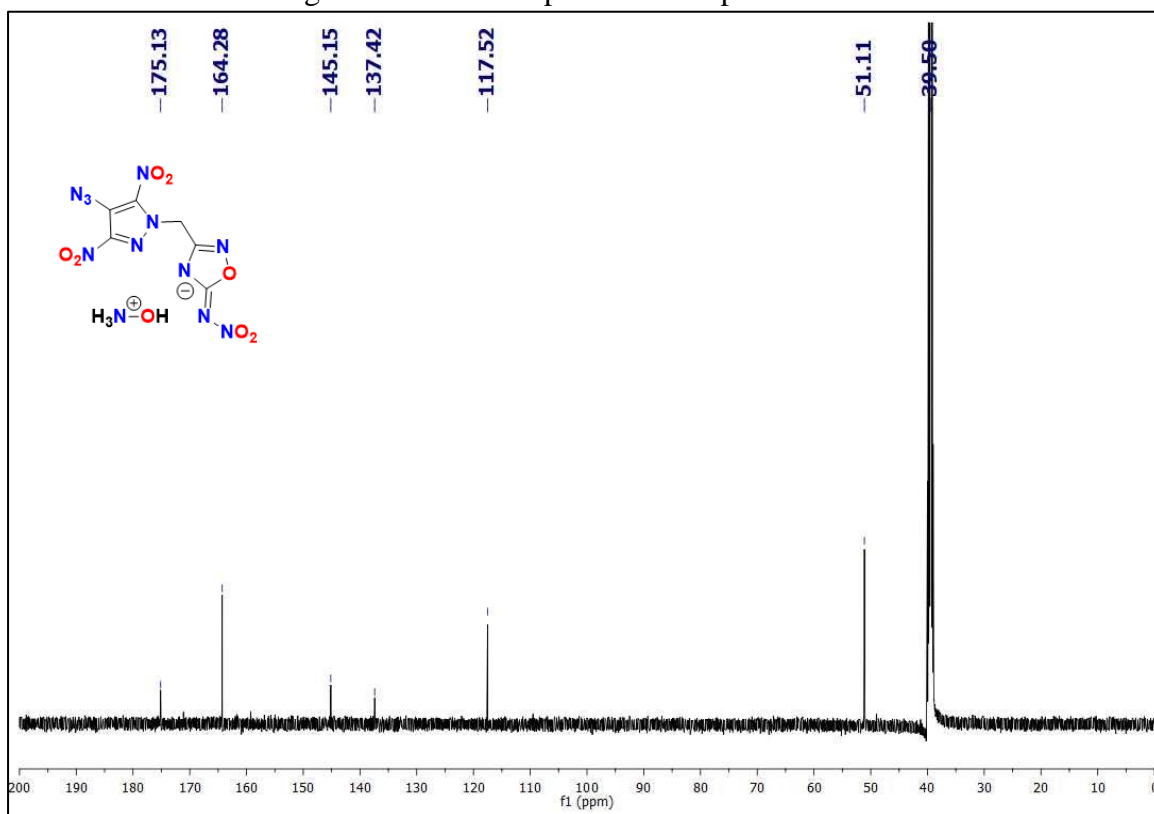

Fig.S24:  $^{13}\text{C}\{^1\text{H}\}$  NMR Spectra of compound 12

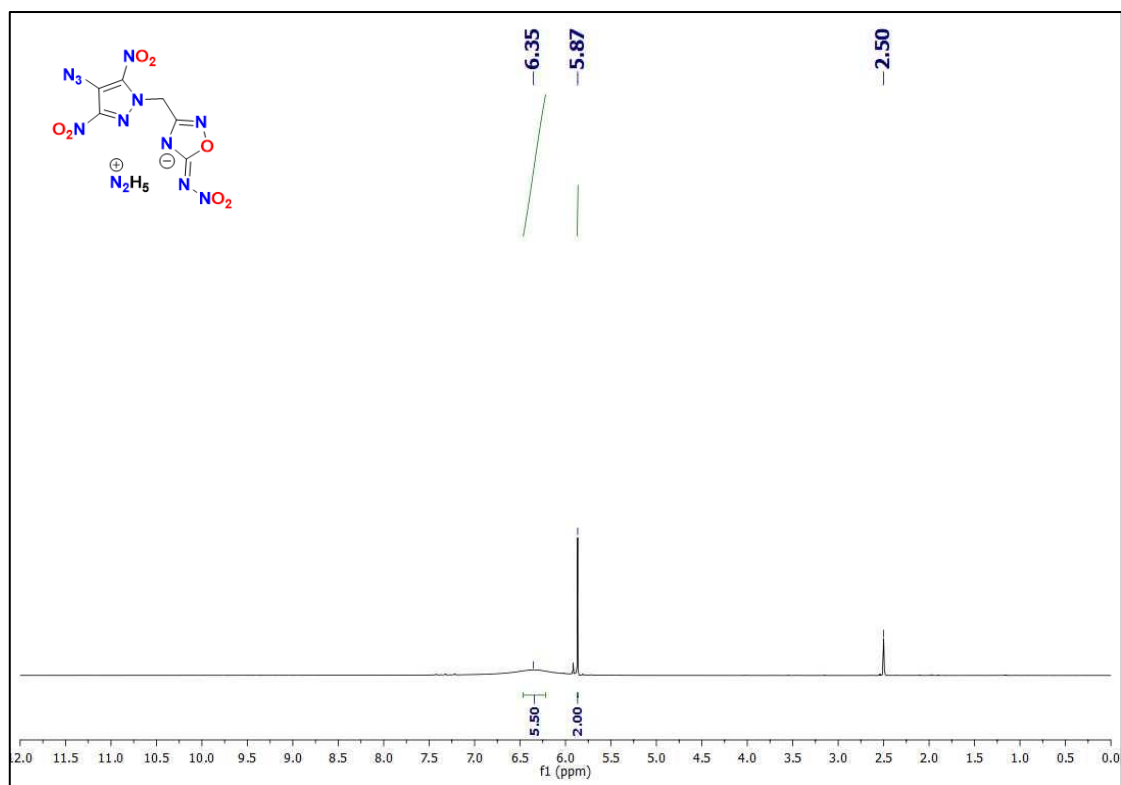

Fig.S25:  $^1\text{H}$  NMR Spectra of compound 13

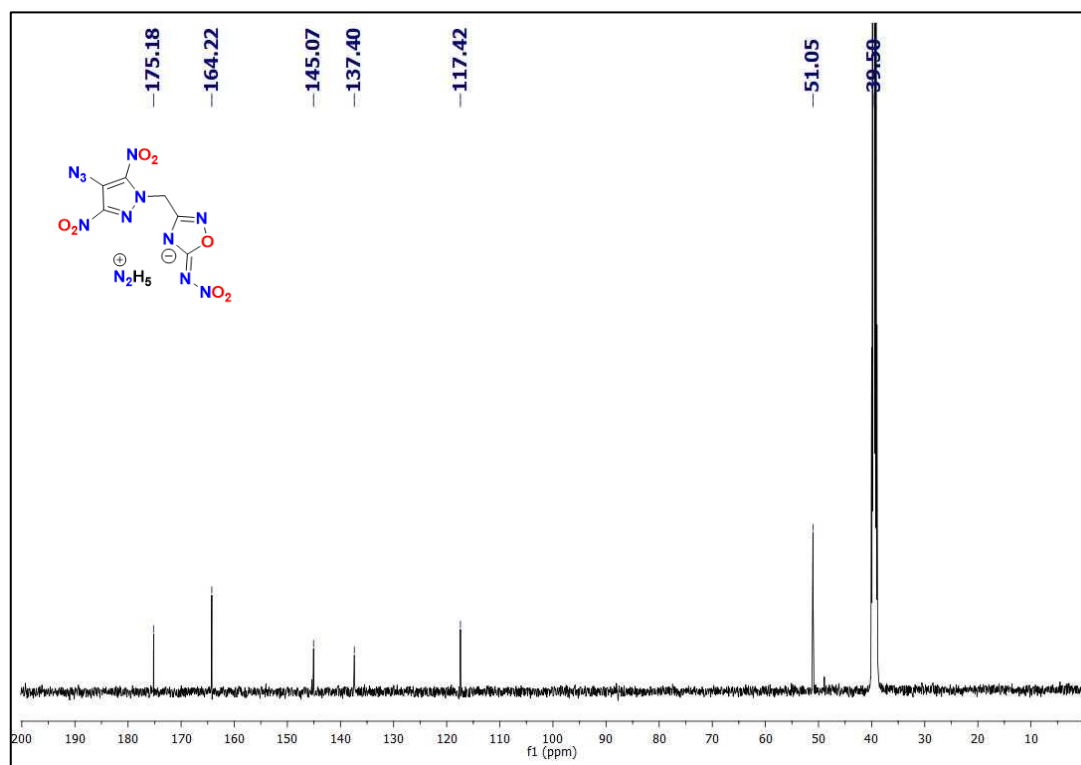

Fig.S26:  $^{13}\text{C}\{^1\text{H}\}$  NMR Spectra of compound 13

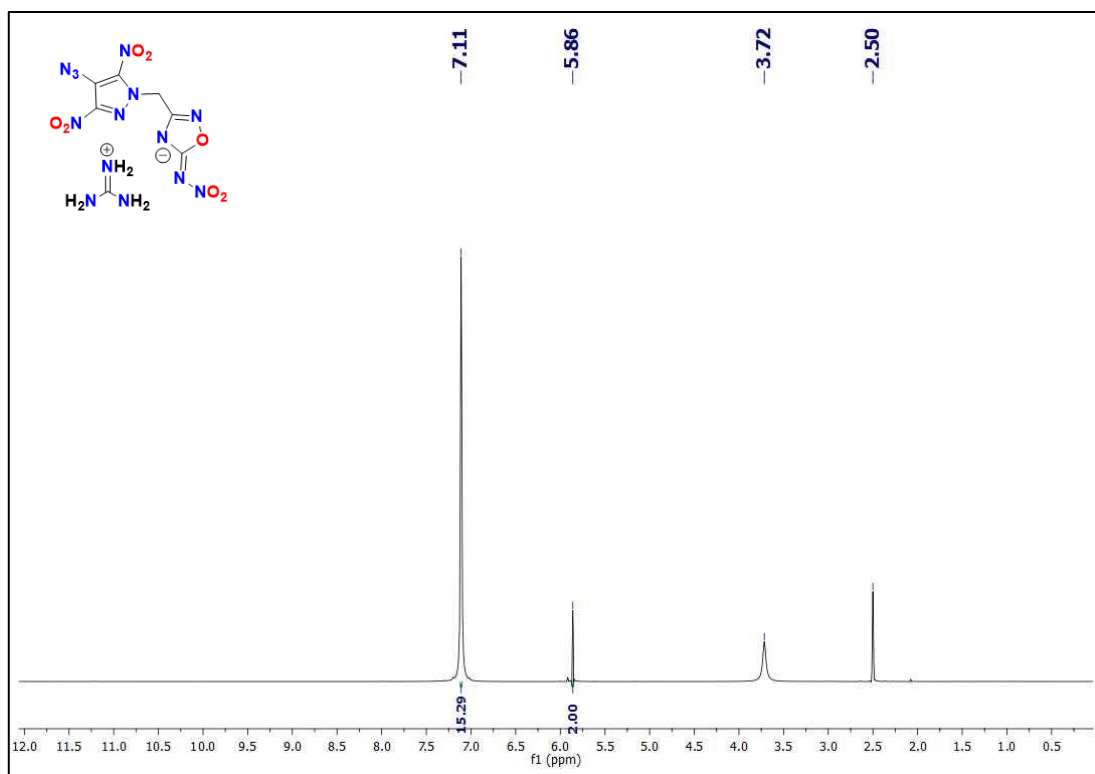

Fig.S27:  $^1\text{H}$  NMR Spectra of compound **14**

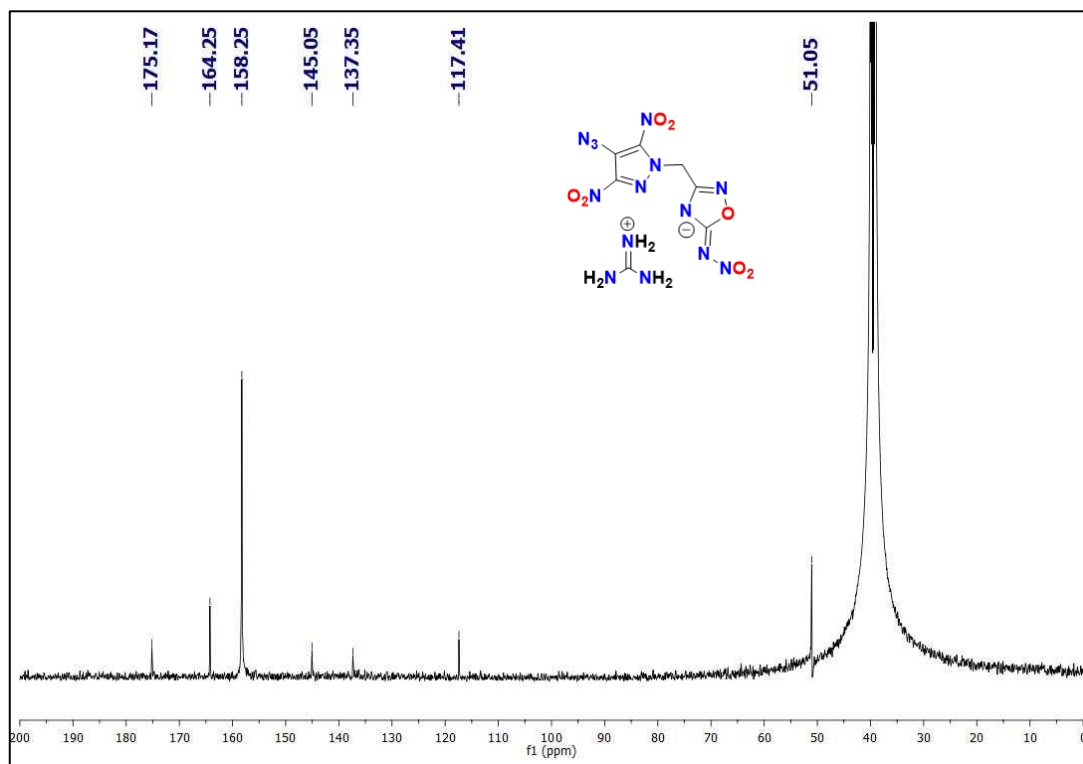

Fig.S28:  $^{13}\text{C}\{^1\text{H}\}$  NMR Spectra of compound **14**

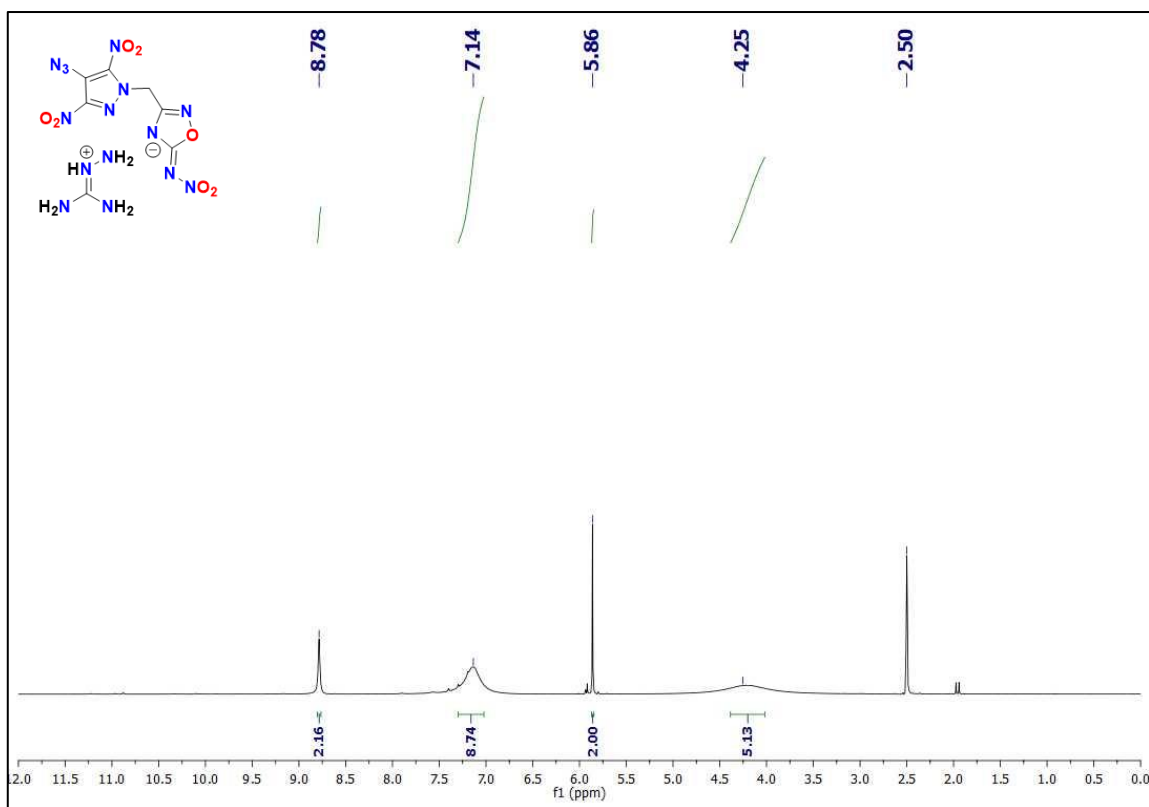

Fig.S29:  $^1\text{H}$  NMR Spectra of compound 15

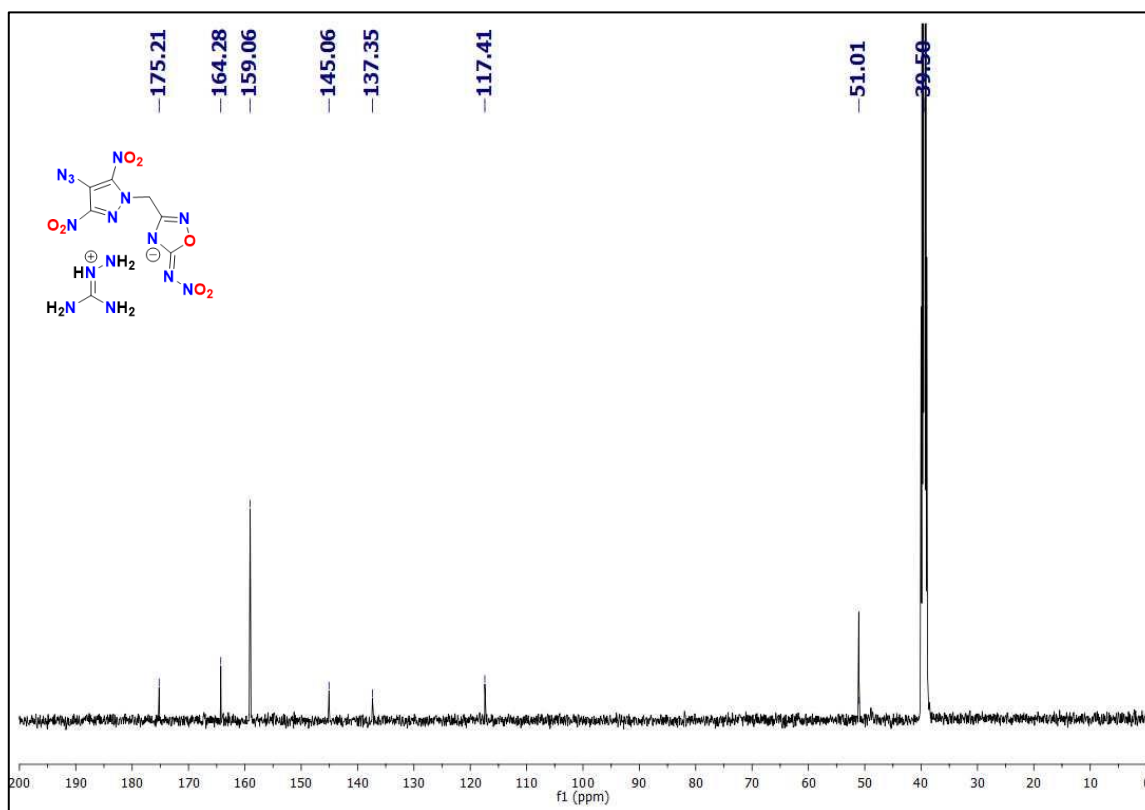

Fig.S30:  $^{13}\text{C}\{^1\text{H}\}$  NMR Spectra of compound 15

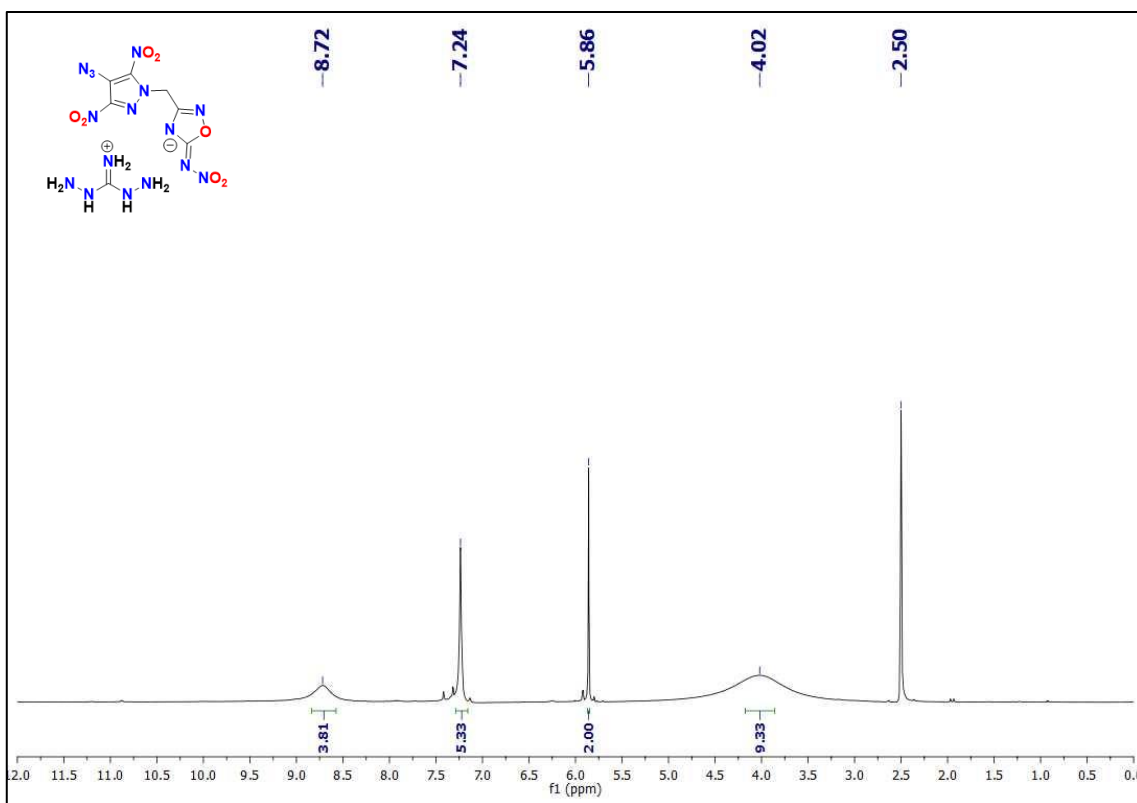

Fig.S31:  $^1\text{H}$  NMR Spectra of compound 16

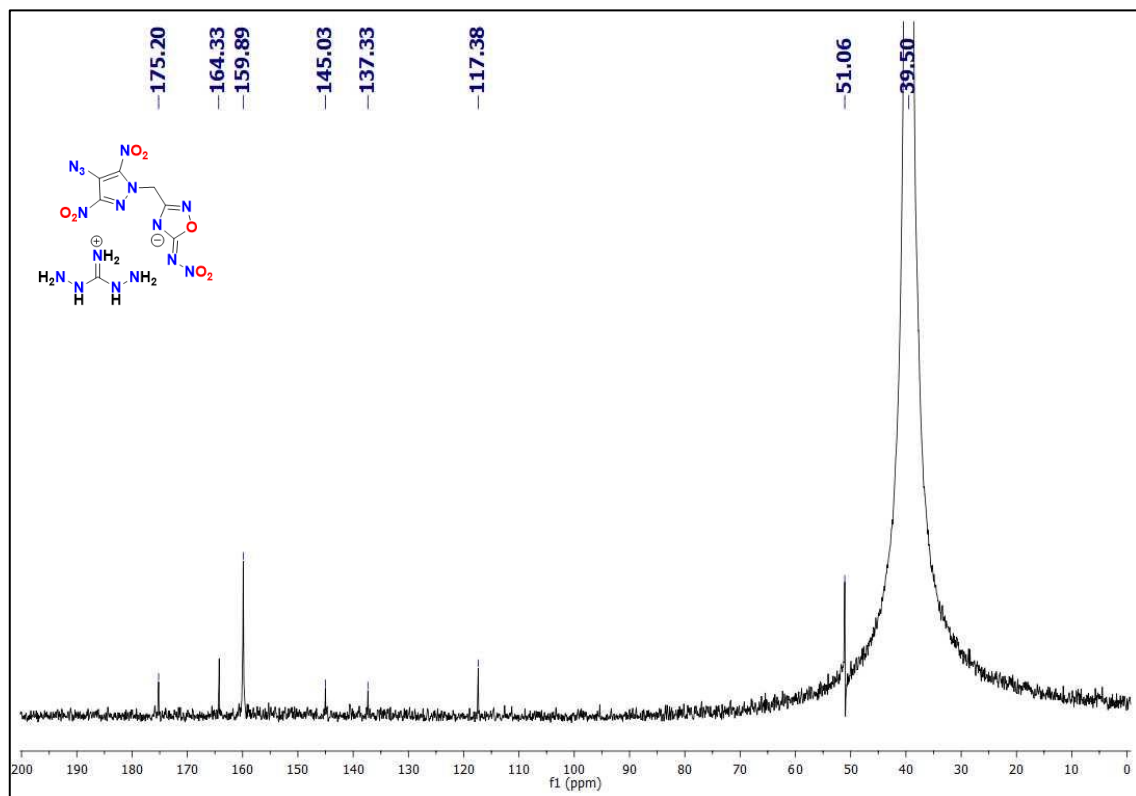

Fig.S32:  $^{13}\text{C}\{^1\text{H}\}$  NMR Spectra of compound 16

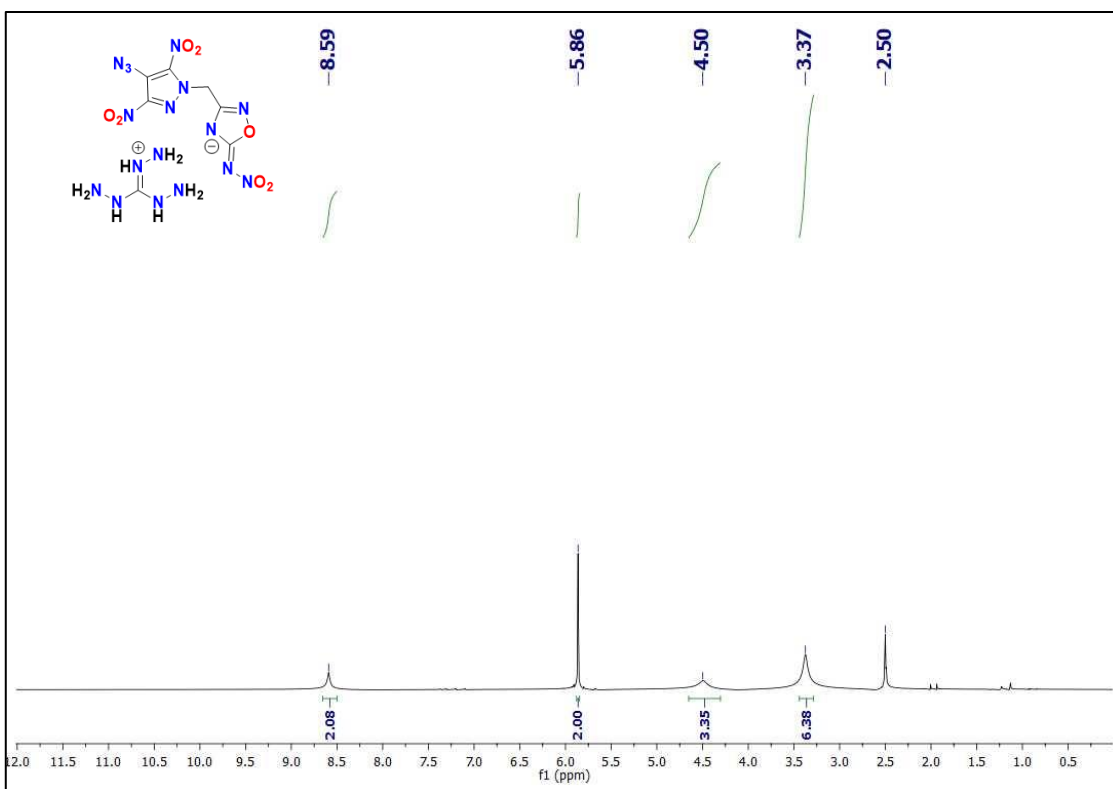

Fig.S33:  $^1\text{H}$  NMR Spectra of compound 17

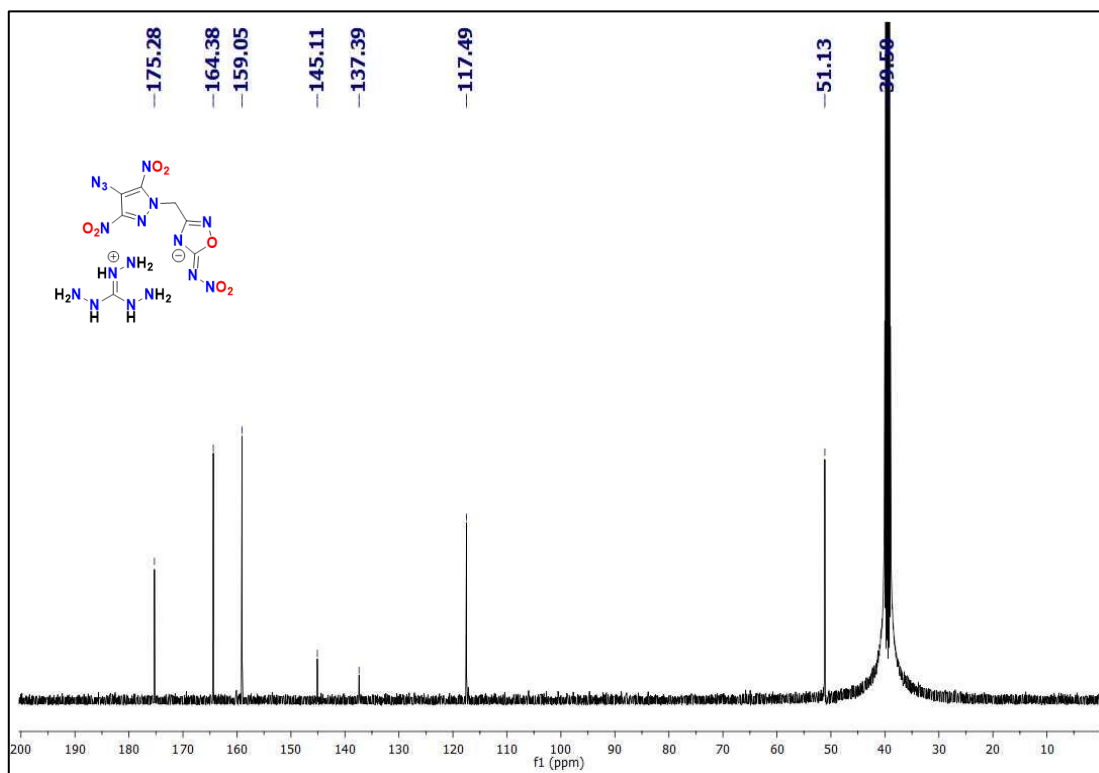

Fig.S34:  $^{13}\text{C}\{^1\text{H}\}$  NMR Spectra of compound 17

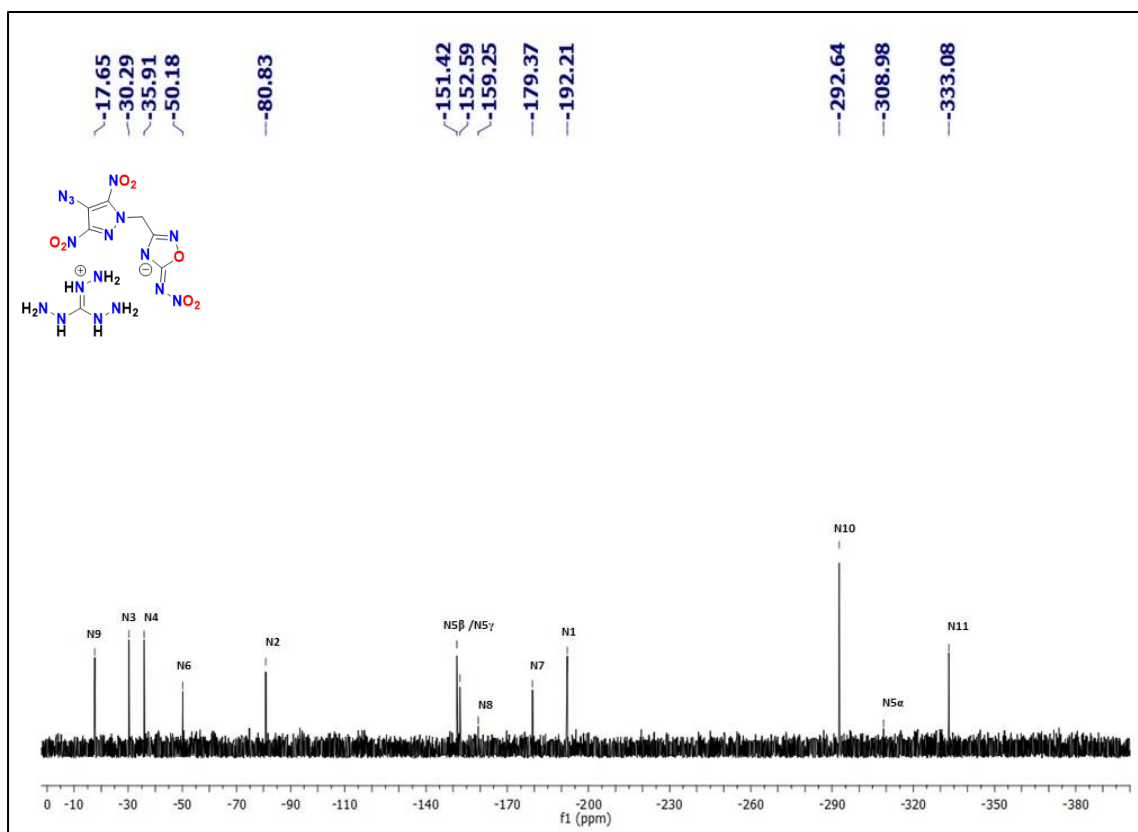

Fig.S35:  $^{15}\text{N}$  NMR Spectra of compound **17**

### IR Spectra:

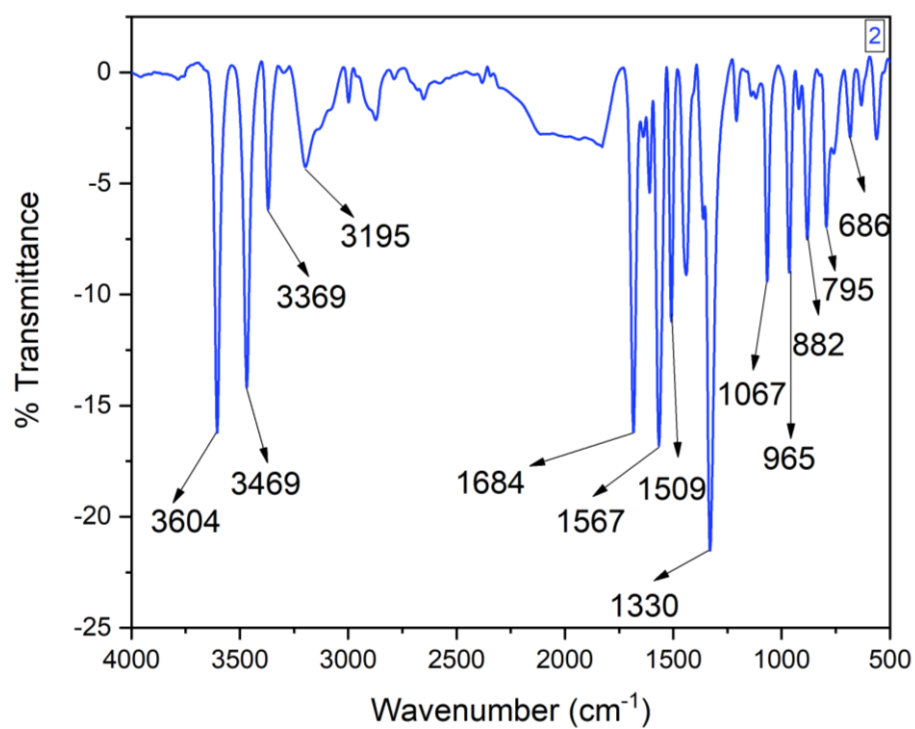

Fig.S36: FTIR Spectra of compound 2

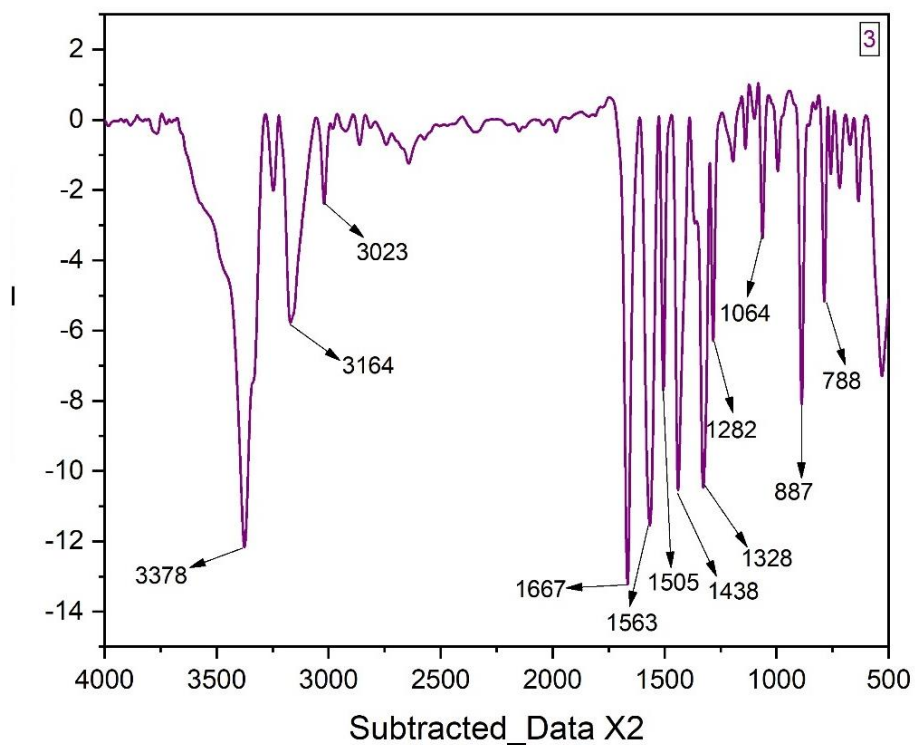

Fig.S37: FTIR Spectra of compound 3

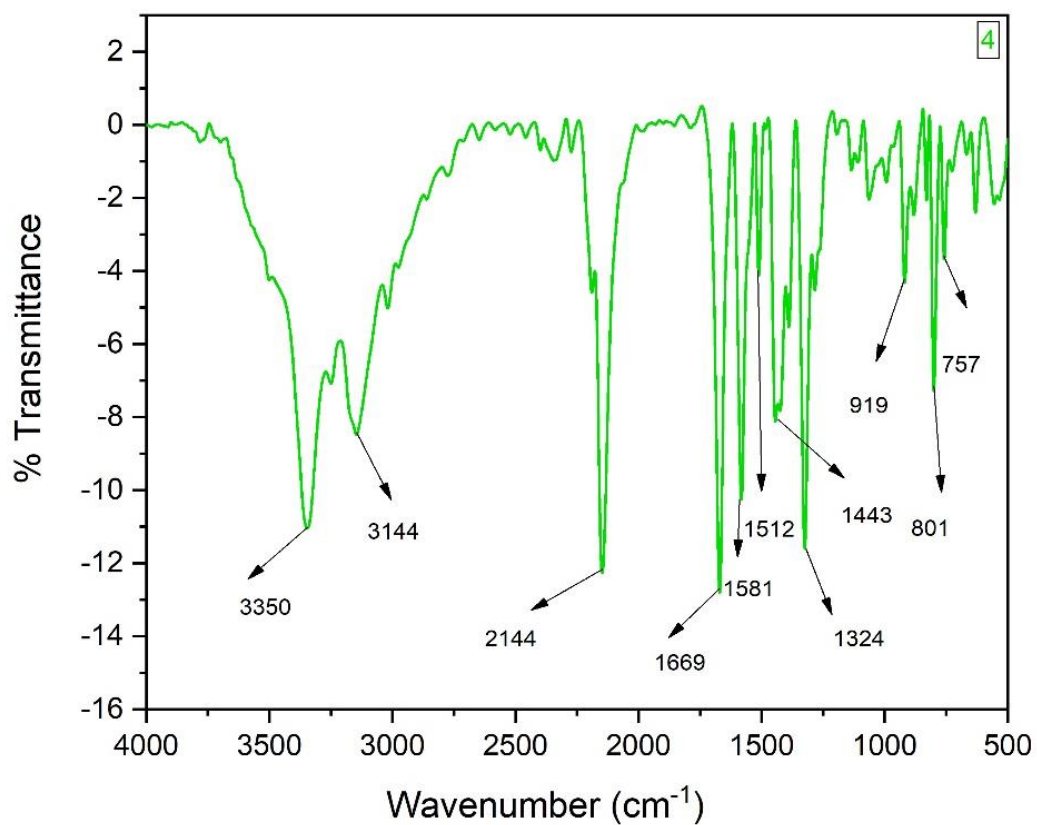

Fig.S38: FTIR Spectra of compound 4



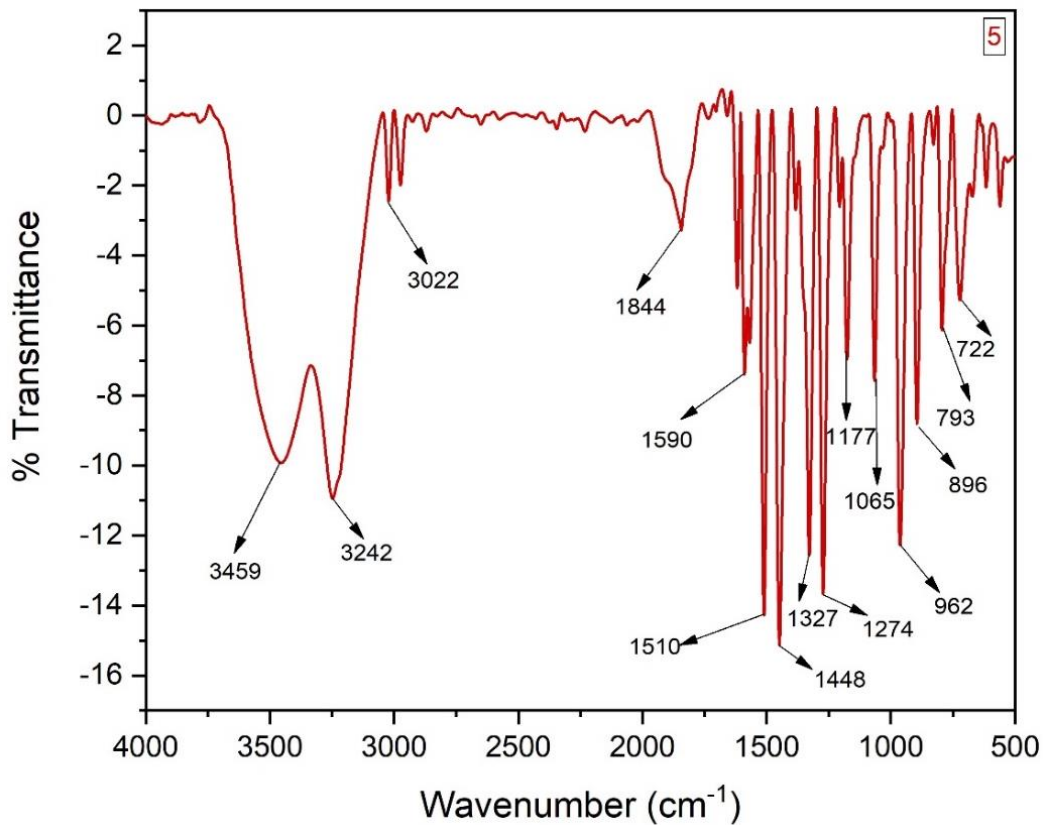

Fig.S39: FTIR Spectra of compound 5

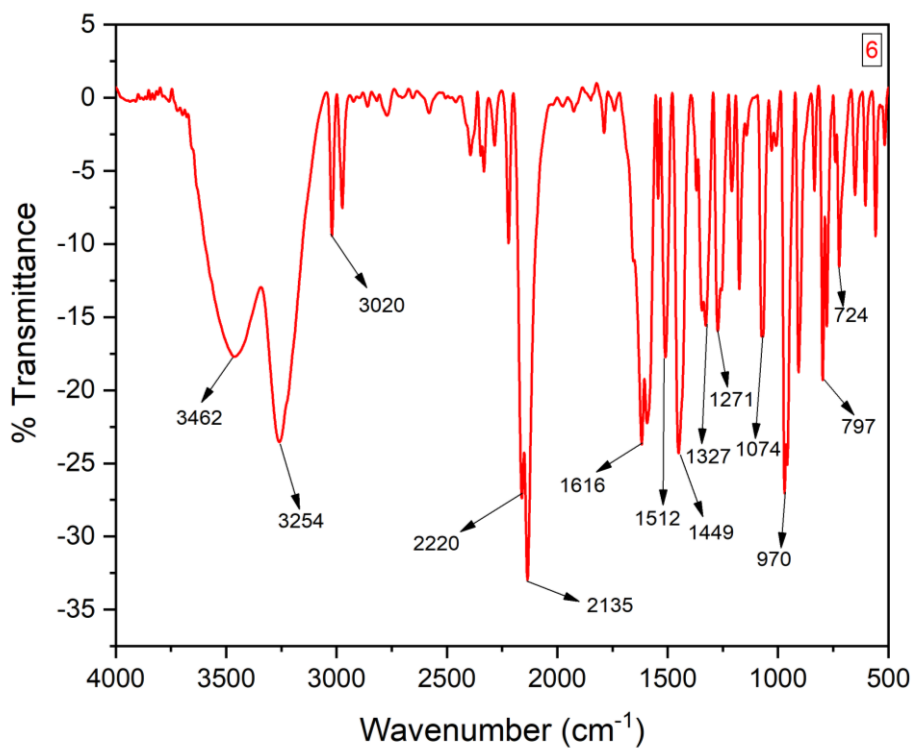

Fig.S40: FTIR Spectra of compound 6

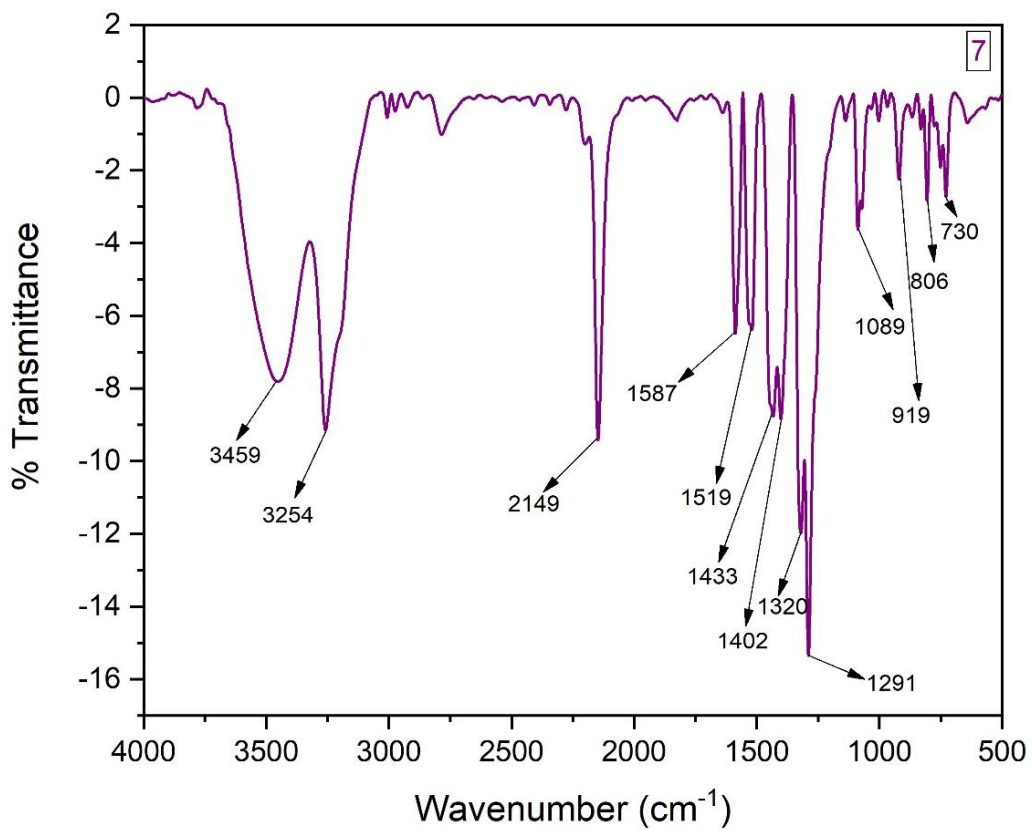

Fig.S41: FTIR Spectra of compound 7

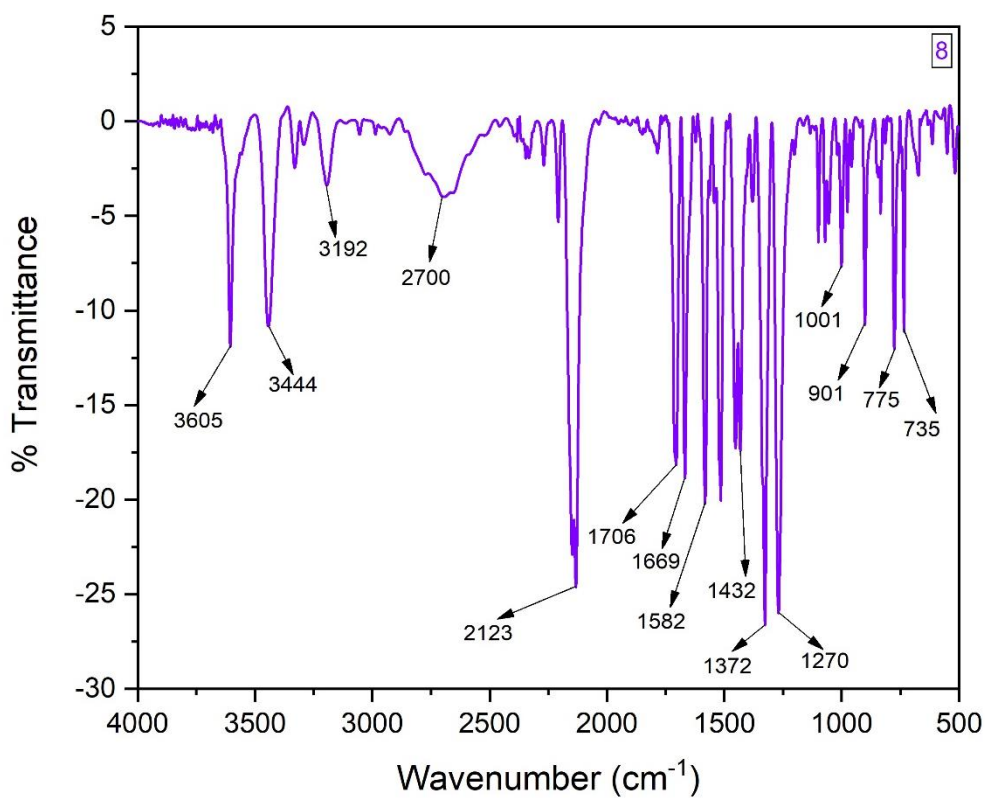

Fig.S42: FTIR Spectra of compound 8

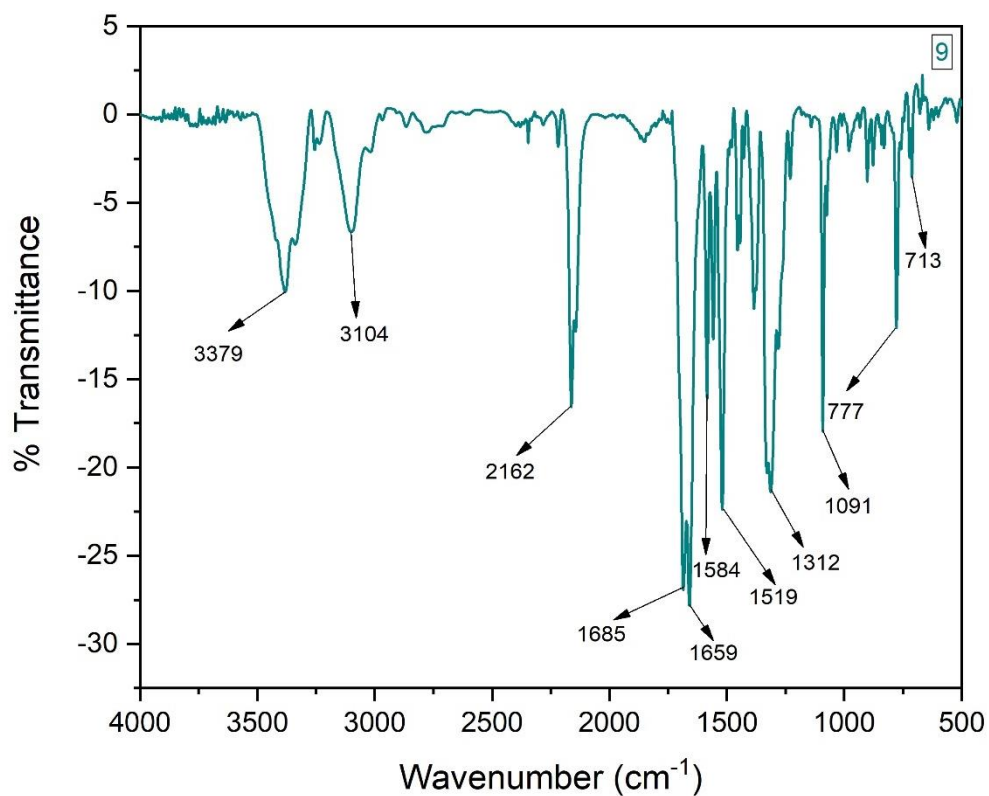

Fig.S43: FTIR Spectra of compound **9**

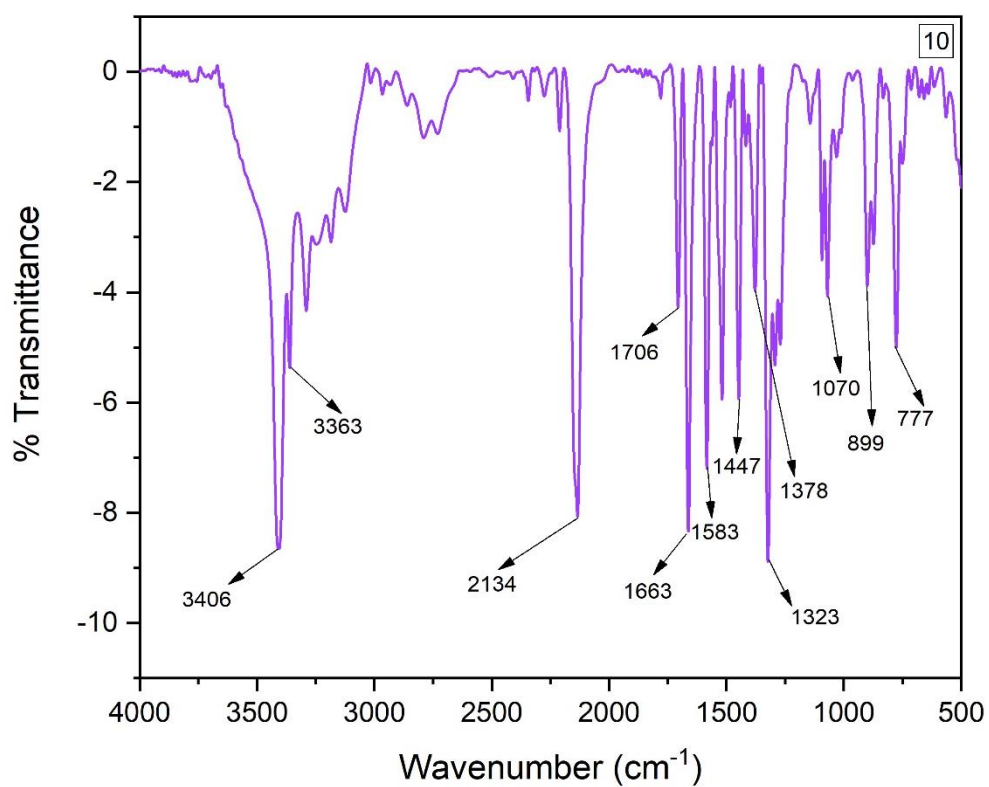

Fig.S44: FTIR Spectra of compound **10**

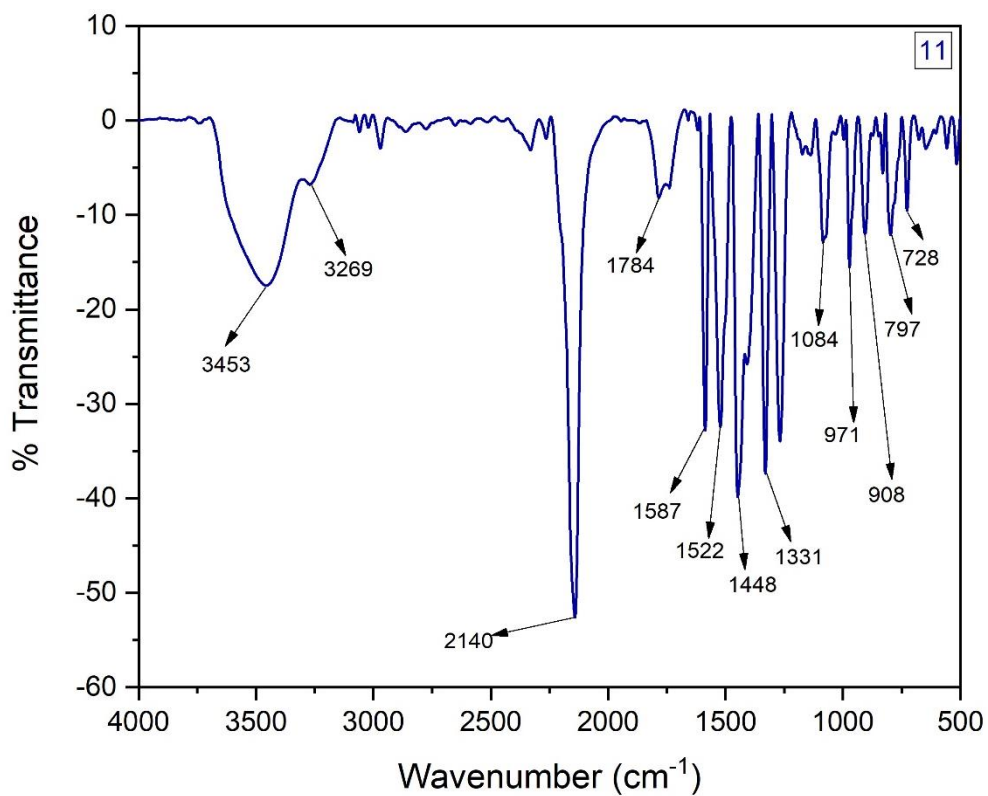

Fig.S45: FTIR Spectra of compound **11**

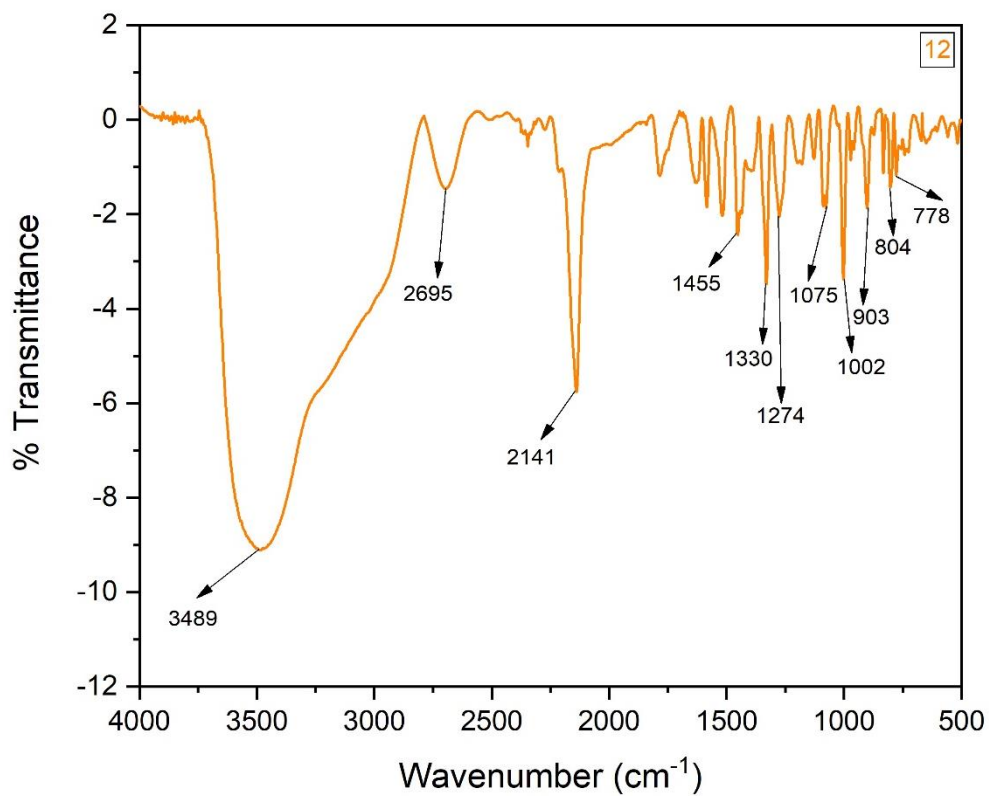

Fig.S46: FTIR Spectra of compound **12**

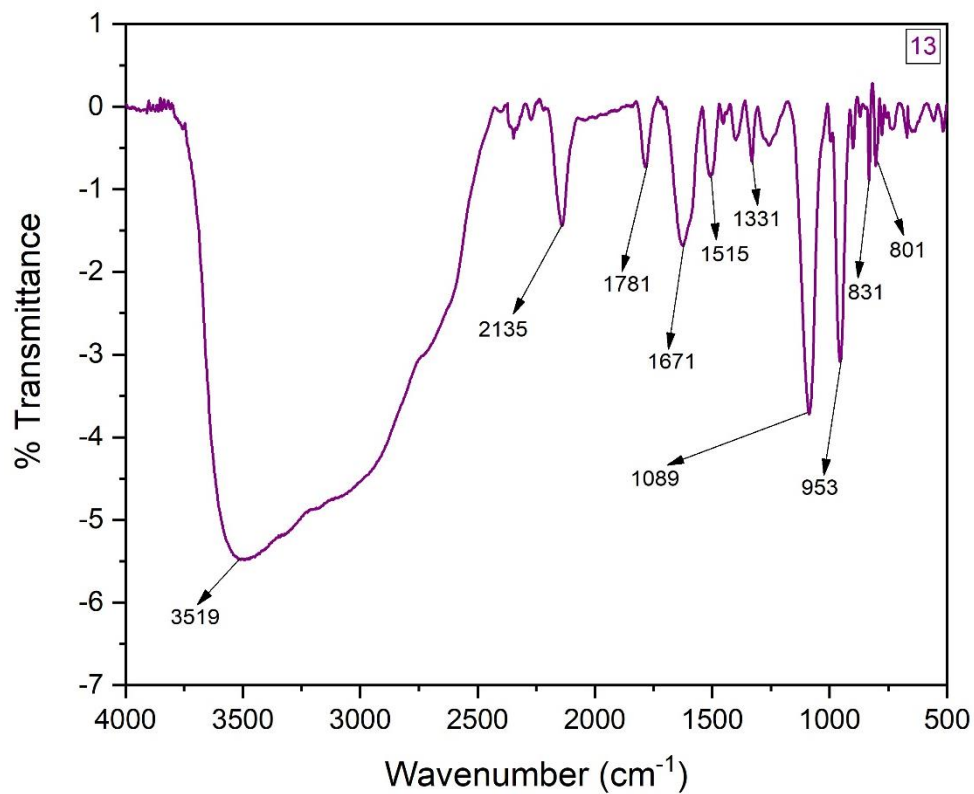

Fig.S47: FTIR Spectra of compound **13**

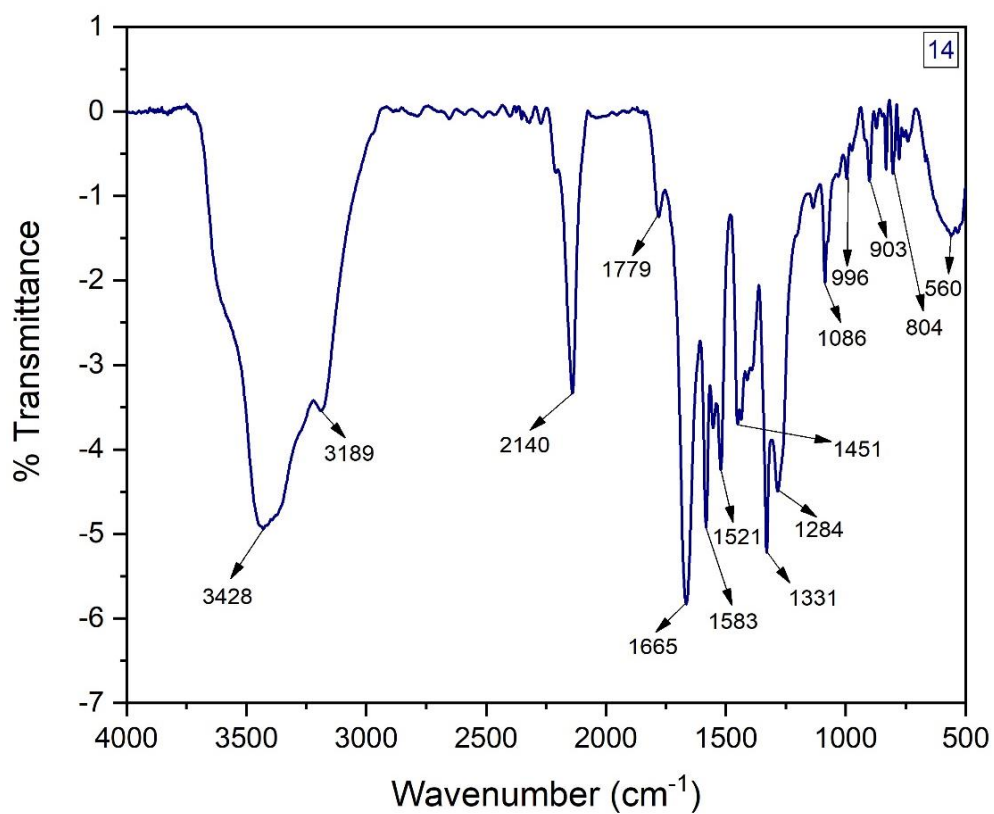

Fig.S48: FTIR Spectra of compound **14**

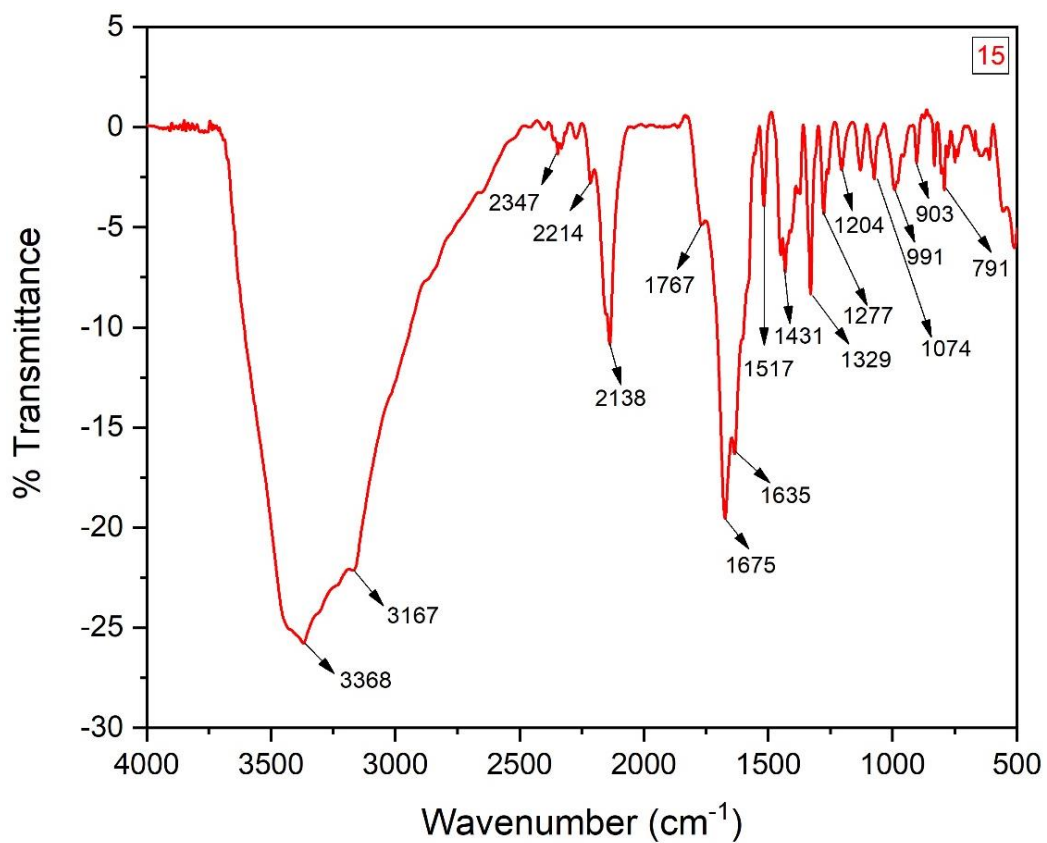

Fig.S49: FTIR Spectra of compound **15**

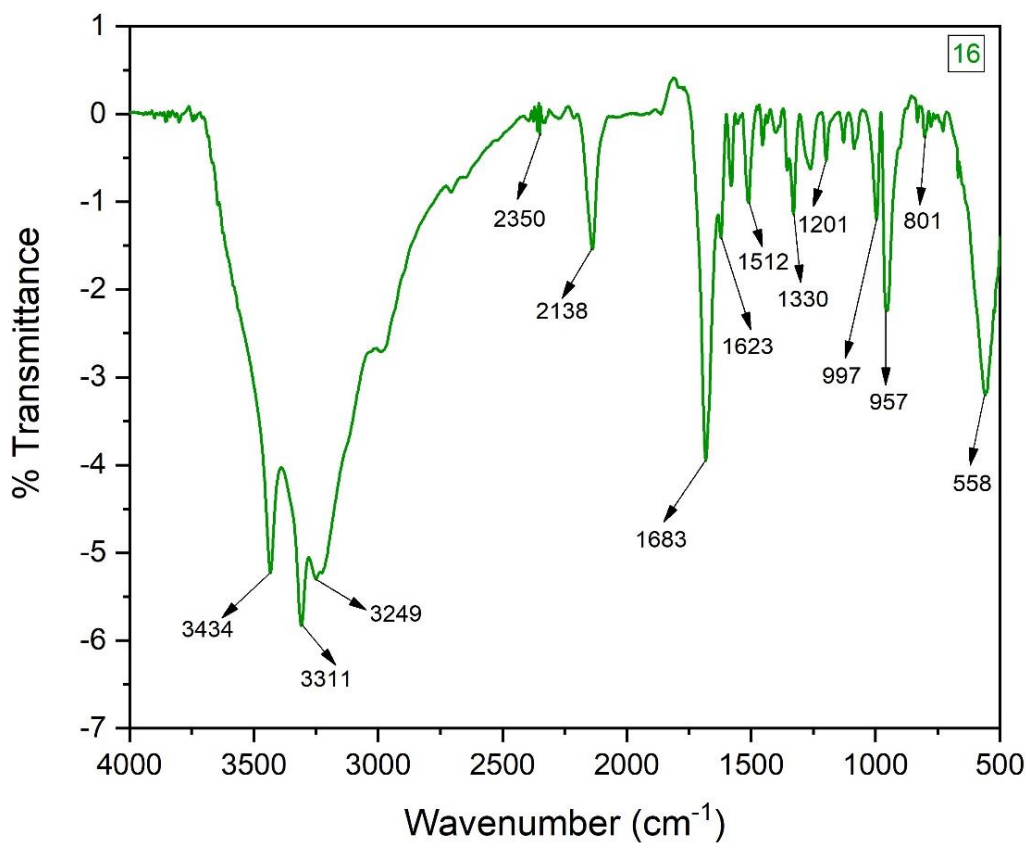

Fig.S50: FTIR Spectra of compound **16**

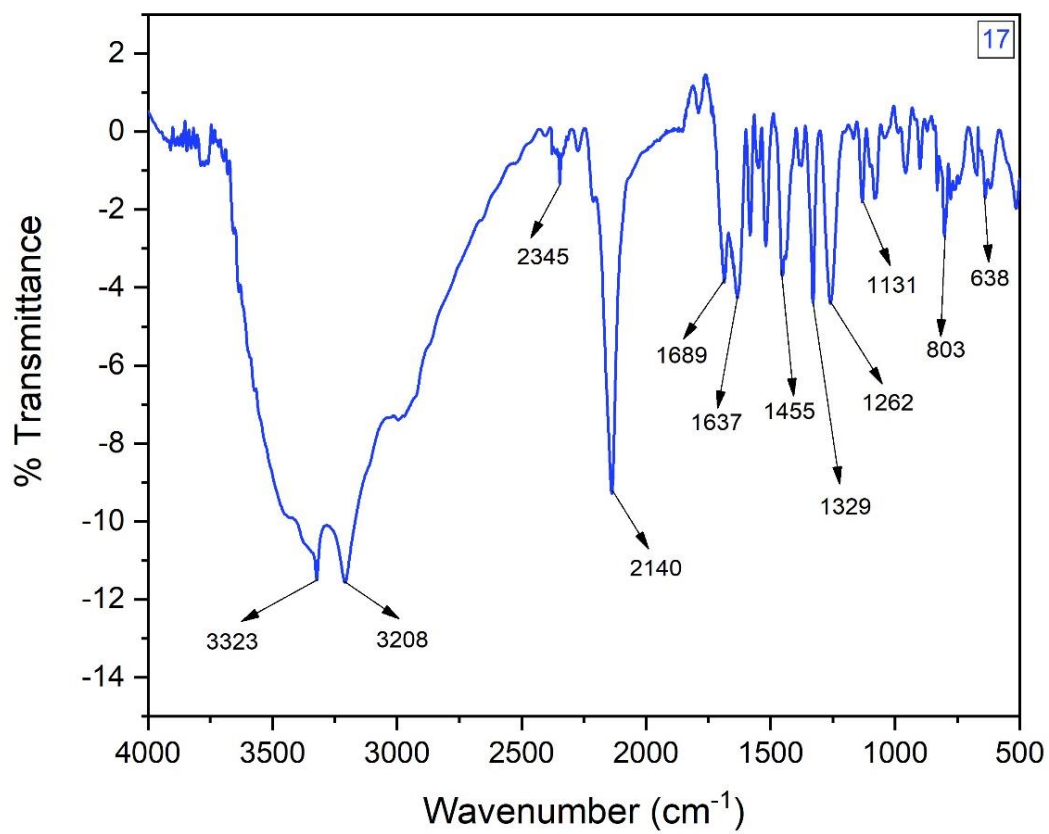

Fig.S51: FTIR Spectra of compound **17**

## Mass Spectra:

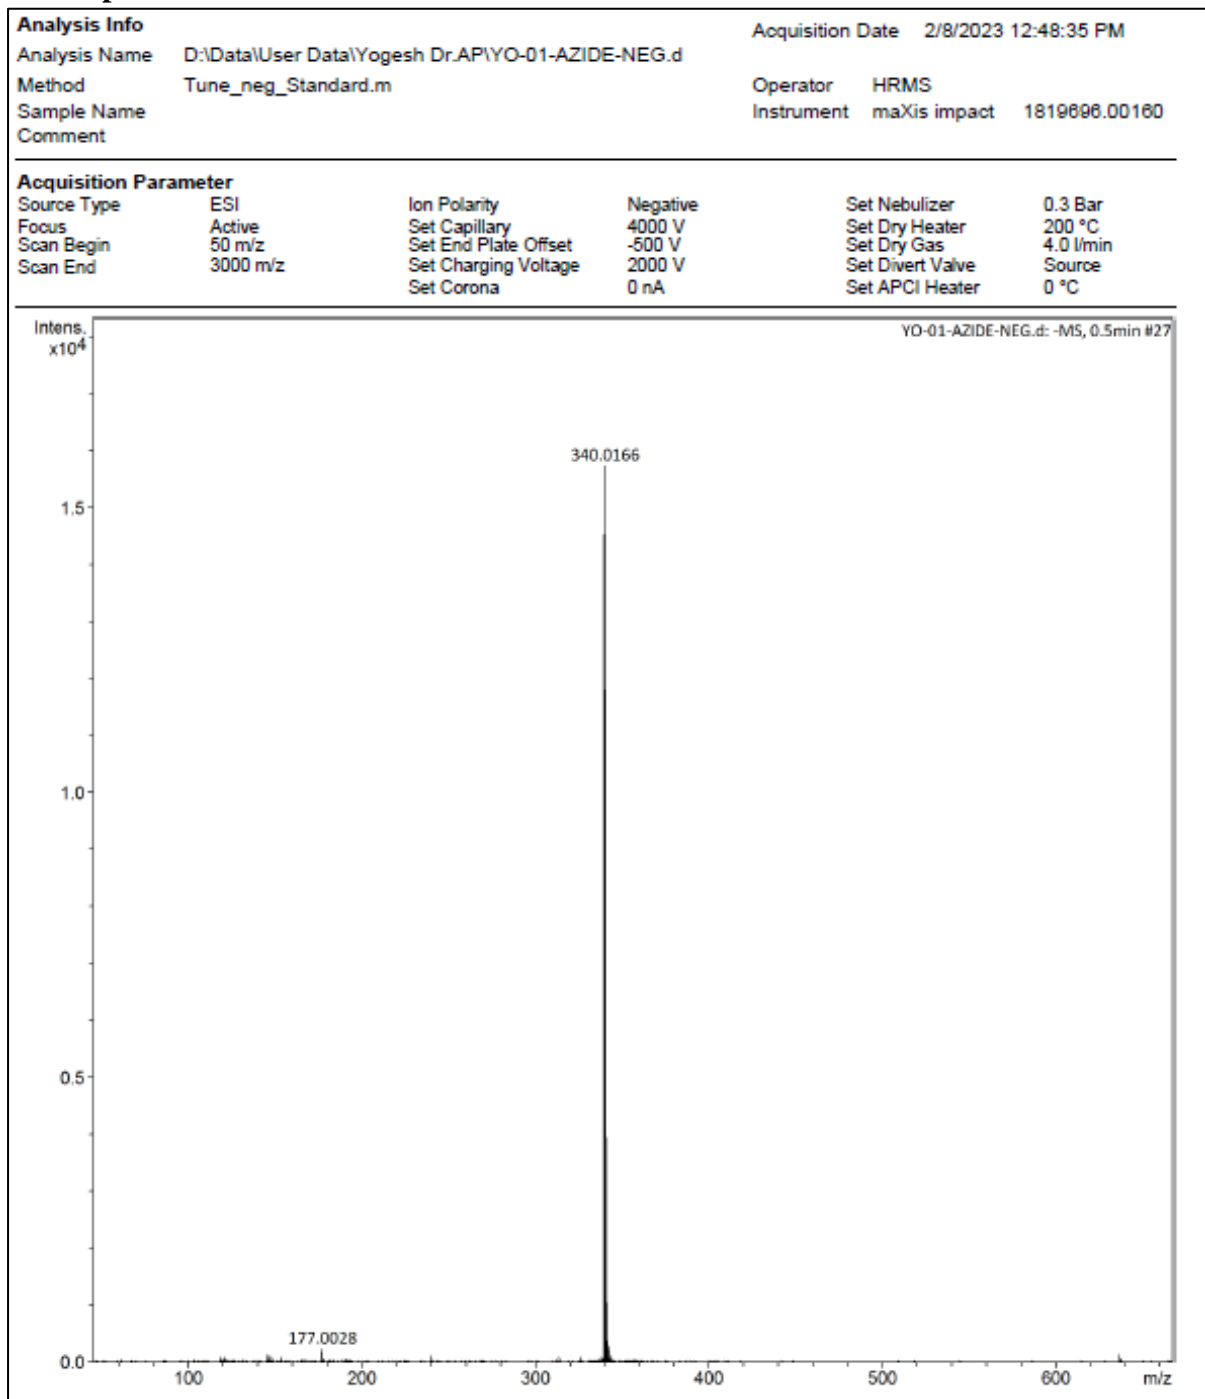

Fig.S52: Mass spectrum of compound **6**



## Thermal Analysis

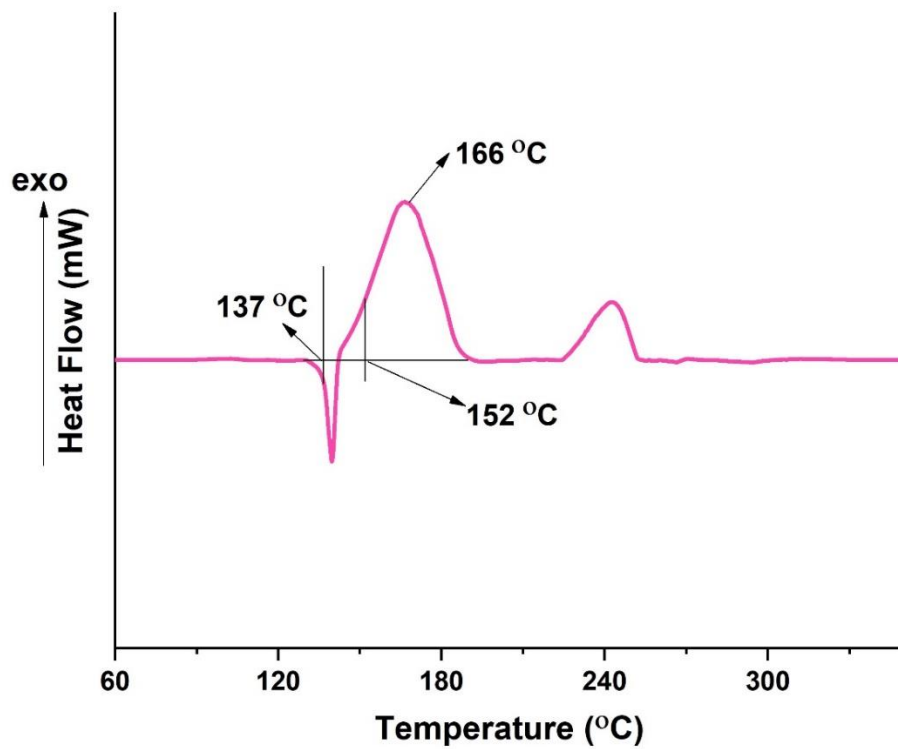

Fig.S53: DSC curve of compound 4

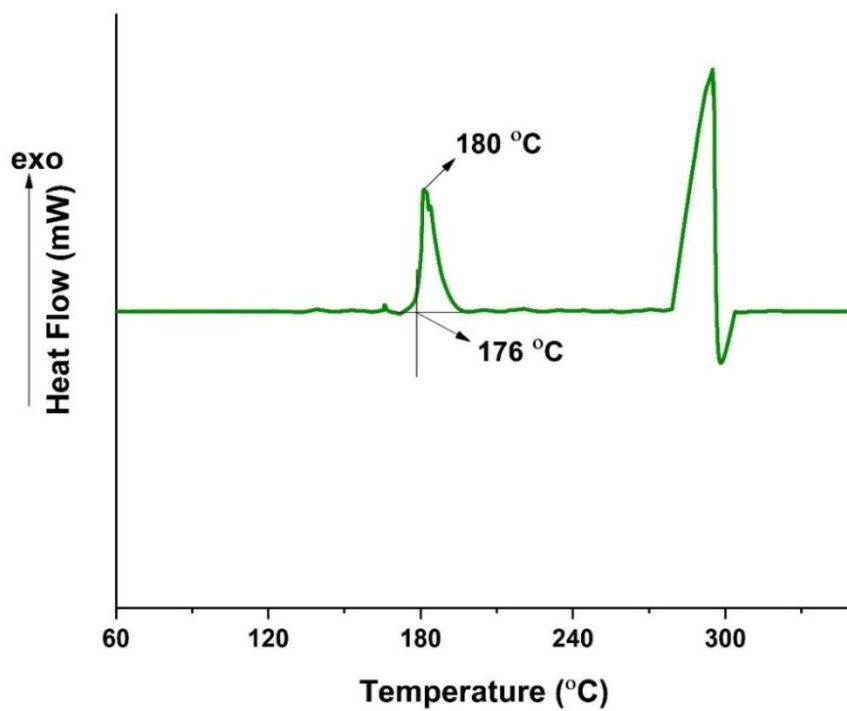

Fig.S54: DSC curve of compound 5

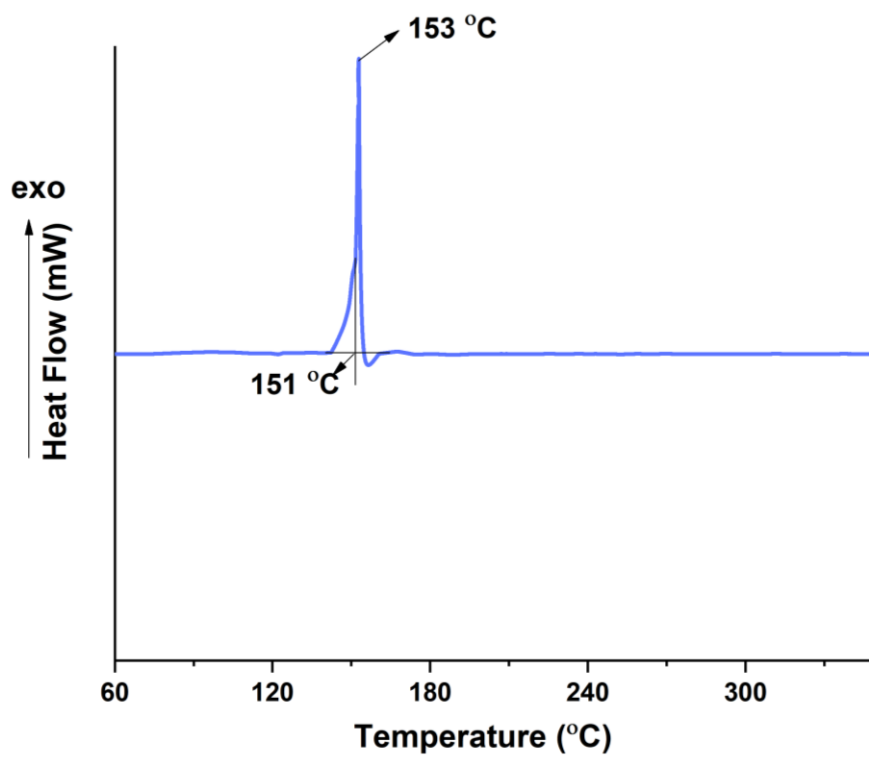

Fig.S55: DSC curve of compound 6

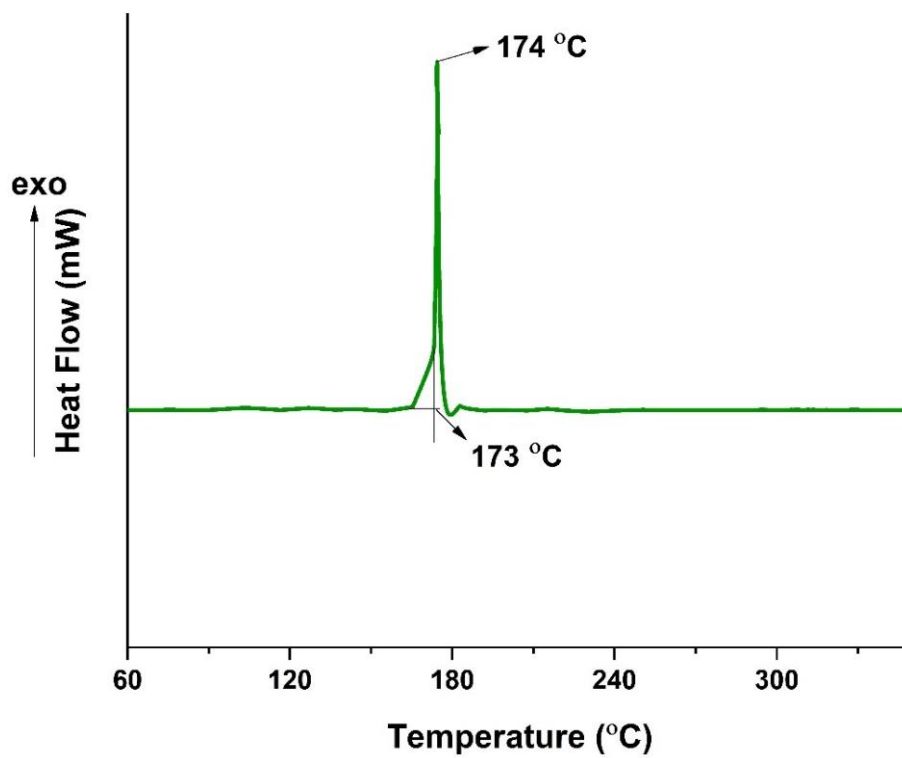

Fig.S56: DSC curve of compound 7

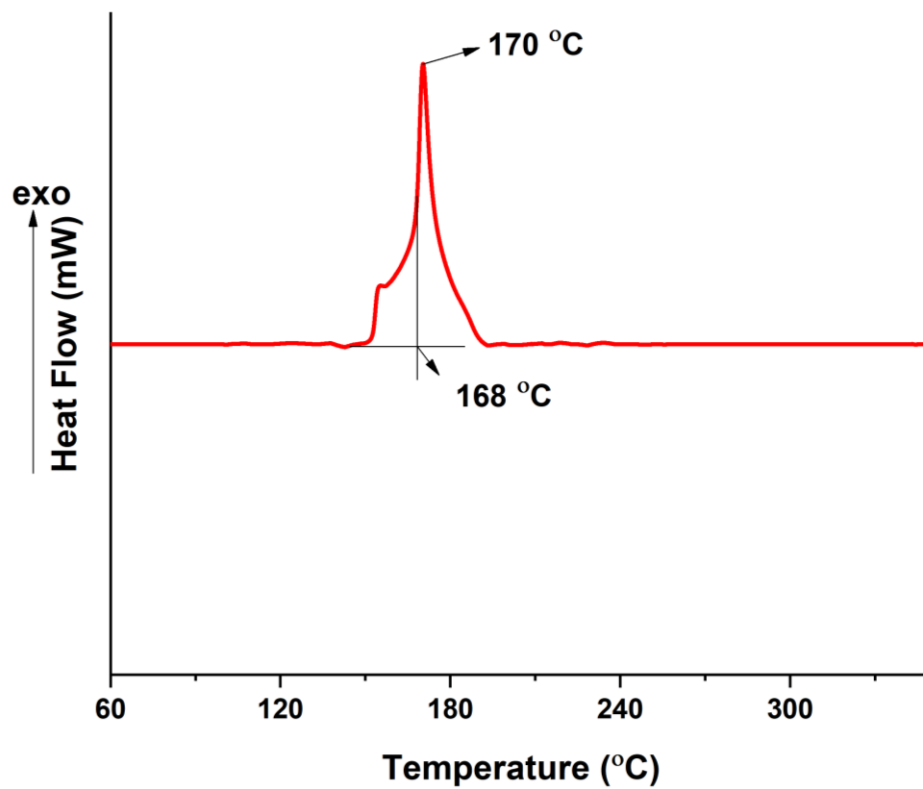

Fig.S57: DSC curve of compound 8

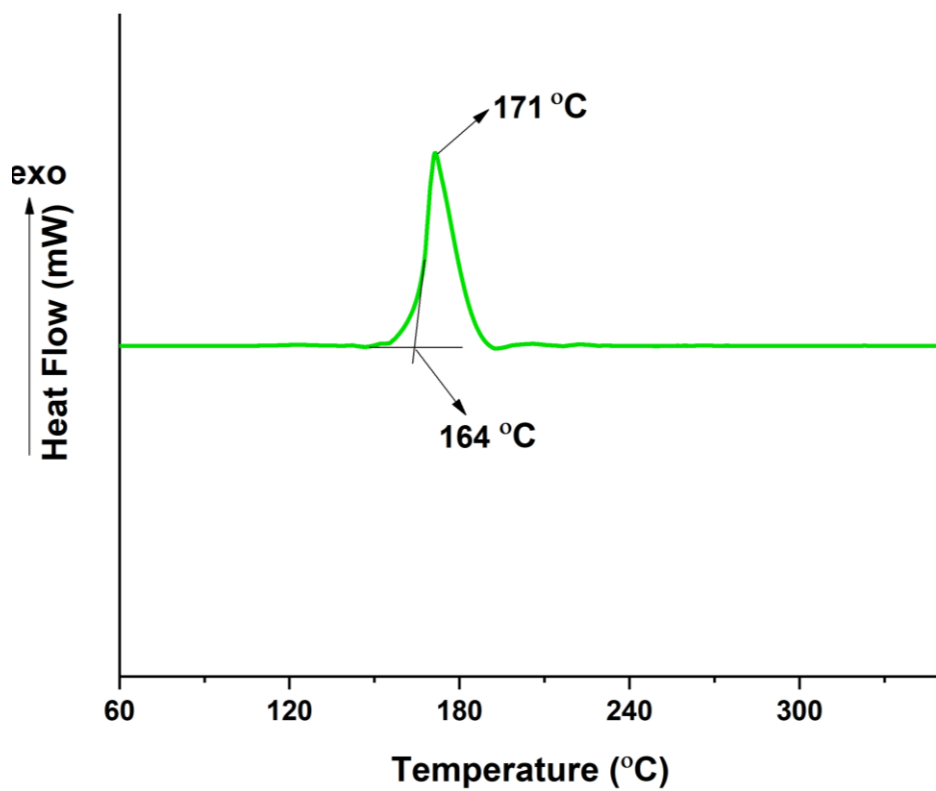

Fig.S58: DSC curve of compound 9

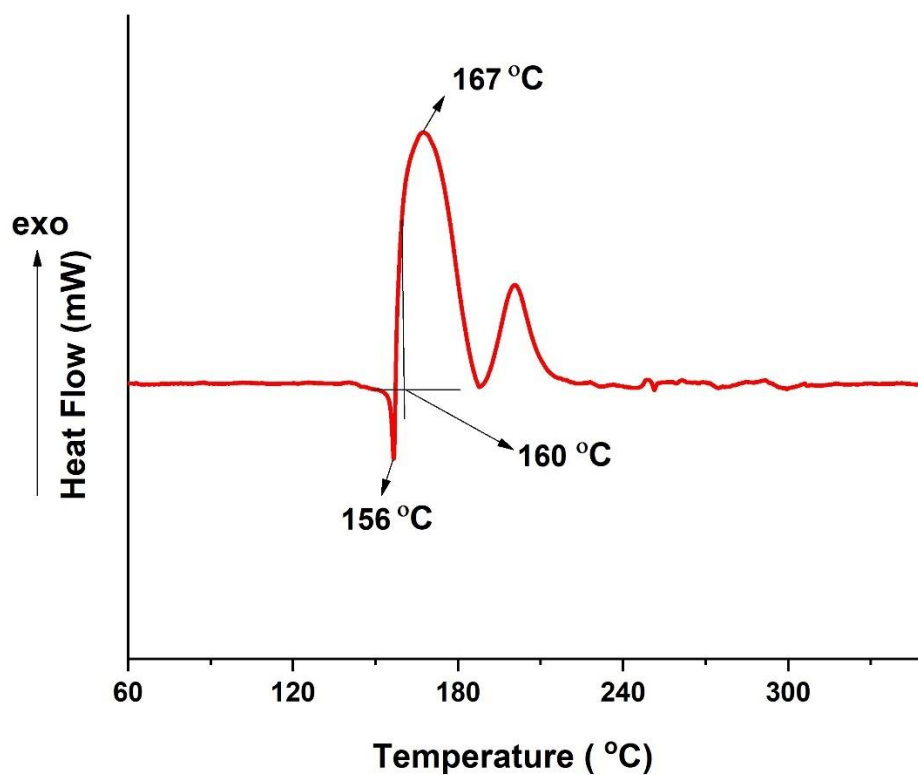

Fig.S59: DSC curve of compound 10

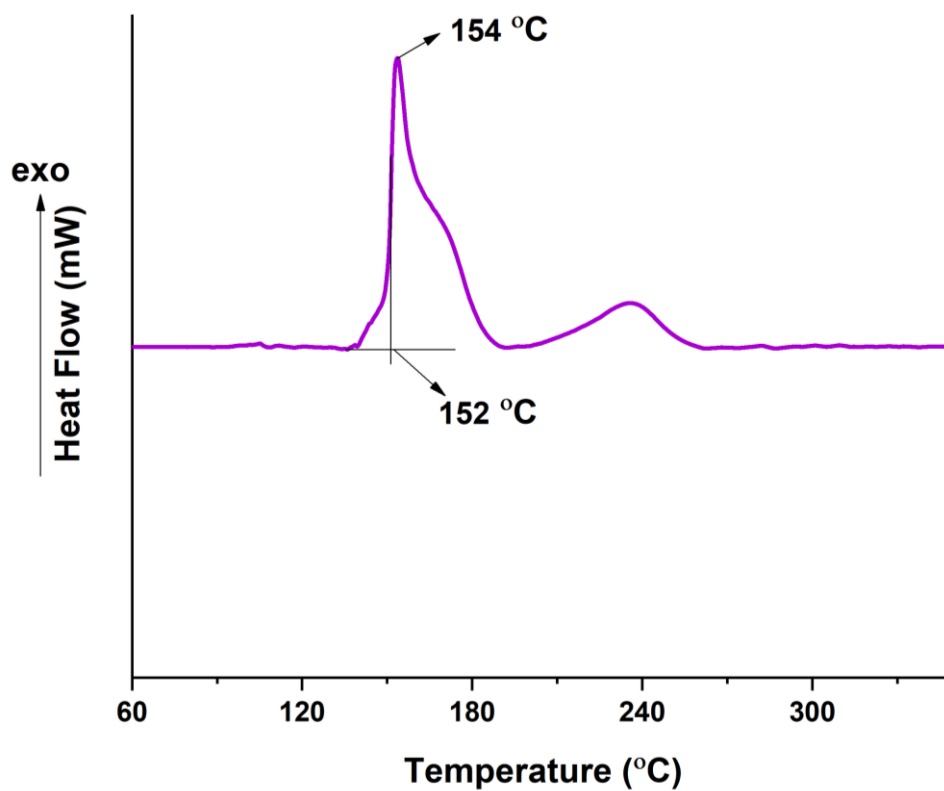

Fig.S60: DSC curve of compound 12

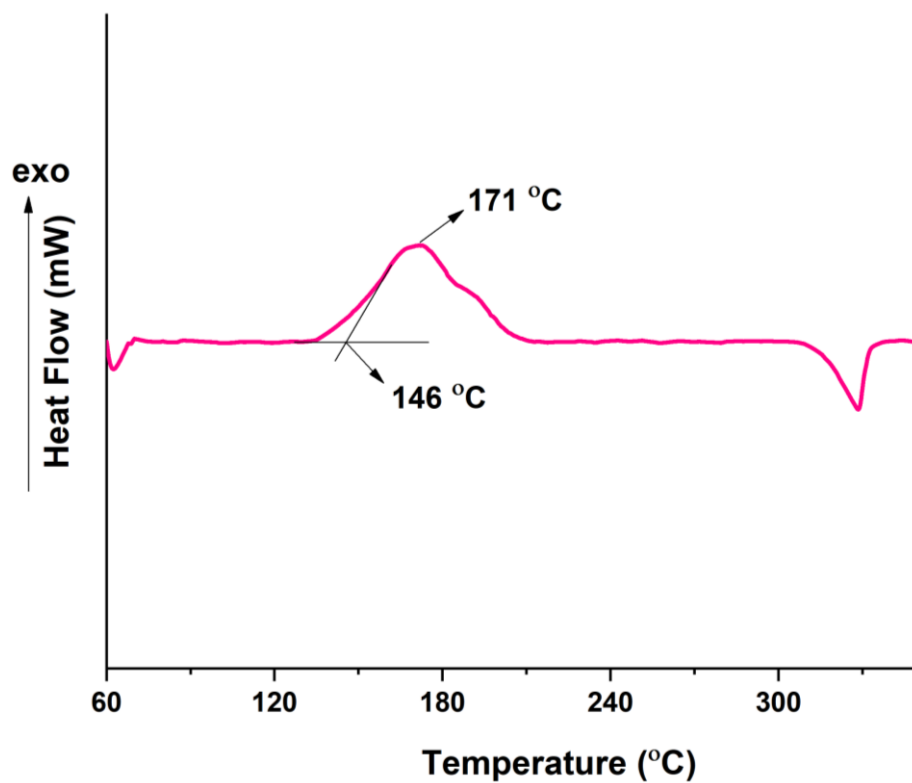

Fig.S61: DSC curve of compound 13

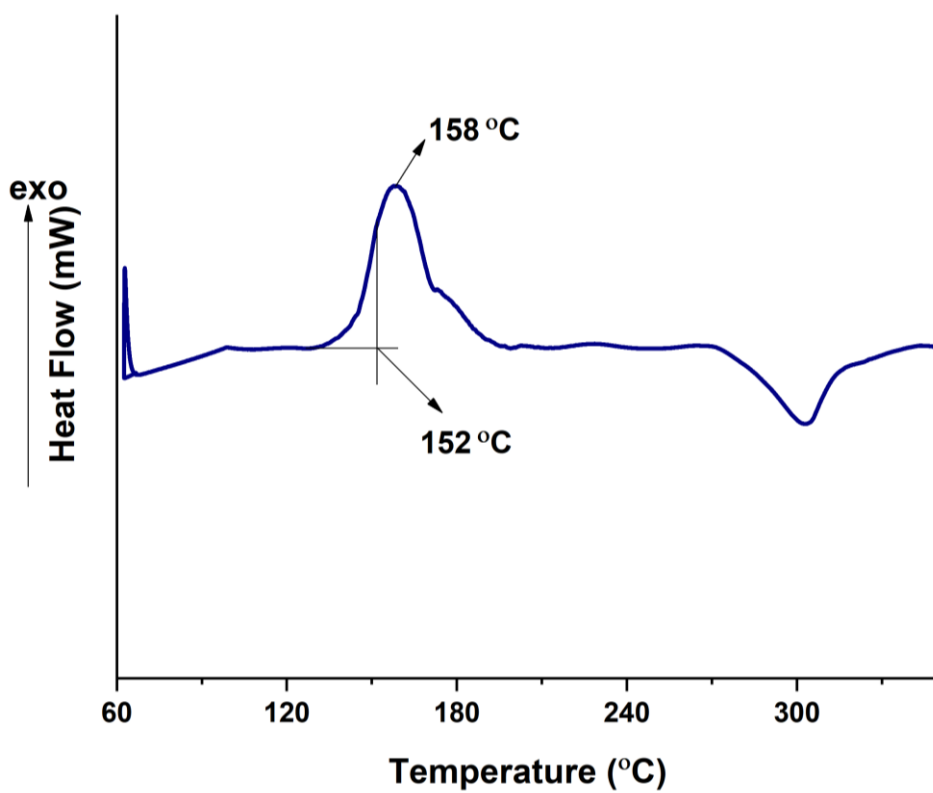

Fig.S63: DSC curve of compound 15

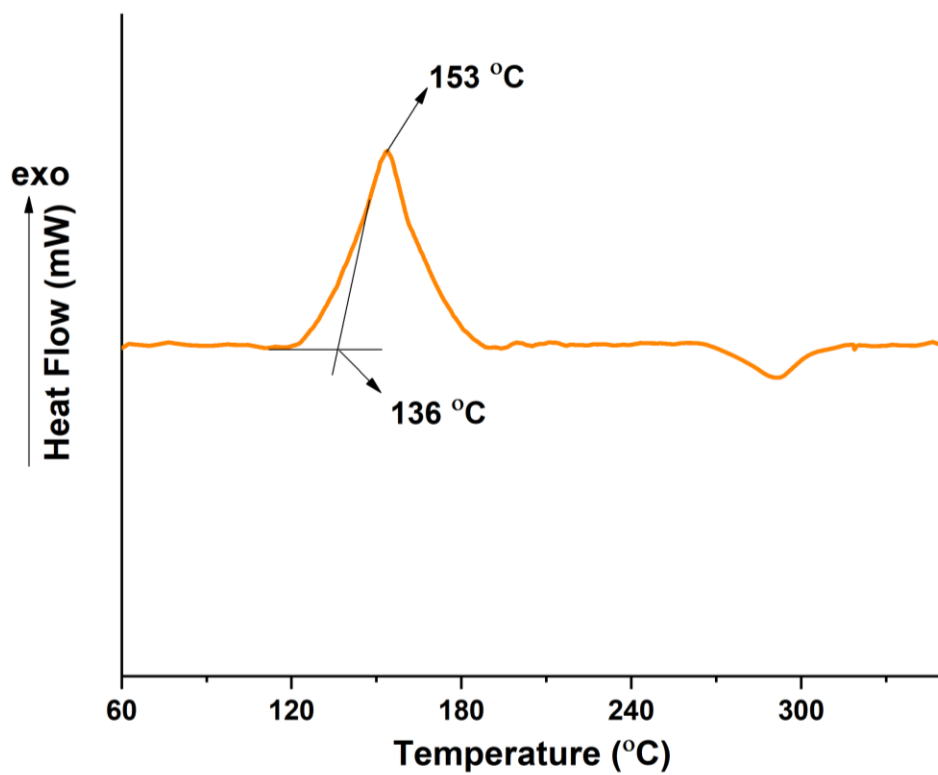

Fig.S64: DSC curve of compound 16

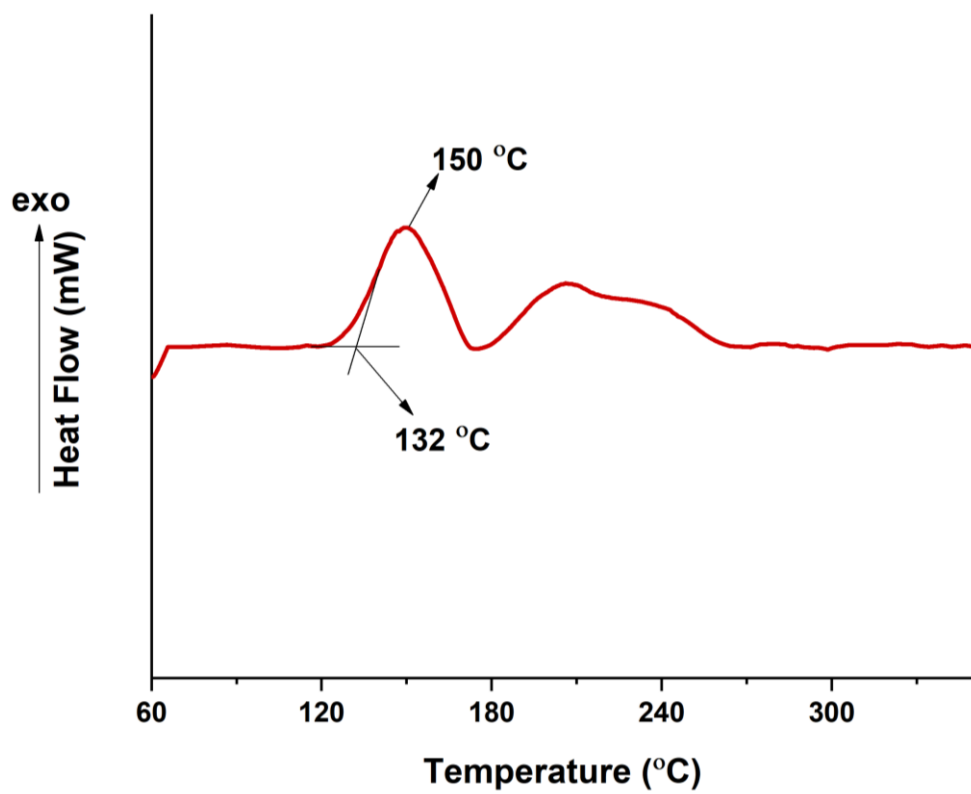

Fig.S65: DSC curve of compound 17
